Laranjeira et al. 2023

1     **Nutritional vitamin B12 regulates RAS/MAPK-mediated cell**  
2             **fate decisions through the one-carbon metabolism**

3  
4     Ana Cristina Laranjeira<sup>1,3</sup>, Simon Berger<sup>1,2</sup>, Tea Kohlbrenner<sup>1,3</sup>, Nadja R. Greter<sup>1,3</sup> and Alex Hajnal<sup>1\*</sup>

5  
6     <sup>1</sup> Institute of Molecular Life Sciences, University of Zurich, Winterthurerstrasse 190, Zurich, Switzerland

7     <sup>2</sup> Institute for Chemical and Bioengineering, ETH Zurich, Vladimir-Prelog-Weg 1-5/10, Zurich, Switzerland

8     <sup>3</sup> PhD program in Molecular Life Science

9  
10    \*Corresponding author: [alex.hajnal@mls.uzh.ch](mailto:alex.hajnal@mls.uzh.ch)

11  
12    **Keywords:** RAS/MAPK, one-carbon metabolism, vitamin B12, methionine cycle, choline, H3K4me3, fatty acids,  
13    cell fate decision

15 **Abstract**

16 **Vitamin B12 is an essential nutritional co-factor for the folate and methionine cycles, which together**  
17 **constitute the one-carbon metabolism. Here, we show that dietary uptake of vitamin B12 modulates cell**  
18 **fate decisions controlled by the conserved RAS/MAPK signaling pathway in *C. elegans*. A bacterial diet**  
19 **rich in vitamin B12 increases vulval induction, germ cell apoptosis and oocyte differentiation. These effects**  
20 **are mediated by different one-carbon metabolites in a tissue-specific manner. Vitamin B12 enhances via the**  
21 **choline/phosphatidylcholine metabolism vulval induction by down-regulating fat biosynthesis genes and**  
22 **increasing H3K4 tri-methylation, which results in increased expression of RAS/MAPK target genes.**  
23 **Furthermore, the nucleotide metabolism and H3K4 tri-methylation positively regulate germ cell apoptosis**  
24 **and oocyte production. Using mammalian cells carrying different activated KRAS and BRAF alleles, we**  
25 **show that the effects of methionine on RAS/MAPK-regulated phenotype are conserved in mammals. Our**  
26 **findings suggest that the vitamin B12-dependent one-carbon metabolism is a limiting factor for diverse**  
27 **RAS/MAPK-induced cellular responses.**

28

## 29 Introduction

30 The cell metabolism regulates physiological processes and cancer cell growth by controlling catabolic and  
31 anabolic reactions and transcriptional activity (Bose et al., 2020; Hanahan and Weinberg, 2011). Diet influences  
32 metabolism directly and, as a result, cells must constantly adapt to variations in diet. One example is vitamin B12  
33 (cobalamin), an essential micronutrient that requires dietary intake. Vitamin B12 is an important metabolic co-  
34 factor in two metabolic pathways, the mitochondrial propionate breakdown pathway and the one-carbon  
35 metabolism formed by the methionine and folate cycles (**Figure 1A**). In the canonical propionate breakdown  
36 pathway, vitamin B12 acts as a co-factor for methyl malonyl-CoA mutase (MUT, MMCM-1 in *C. elegans*) (Bito  
37 and Watanabe, 2016; Green et al., 2017; Watson et al., 2014, 2016), and in the methionine cycle, it serves as a co-  
38 factor for methionine synthase (MS, METR-1 in *C. elegans*) (**Figure 1A**) (Froese et al., 2019; Green et al., 2017).

39 The one-carbon metabolism transfers single carbon units necessary for nucleotide biosynthesis through the  
40 folate cycle and produces S-adenosyl-methionine (SAM), the main methyl donor in cells. In the methionine cycle,  
41 homocysteine is methylated by MS to form methionine, which is then converted into SAM (Ducker and  
42 Rabinowitz, 2017; Newman and Maddocks, 2017; Ye et al., 2017). SAM is required for phosphatidylcholine (PC)  
43 synthesis (**Figure 1A**) (Ducker and Rabinowitz, 2017; Froese et al., 2019; Newman and Maddocks, 2017). PC is  
44 a polyunsaturated fatty acid that can be produced via the Kennedy/CDP-choline pathway using choline as a  
45 precursor, or by the sequential methylation pathway, which depends on SAM-methyl groups (**Figure 1A**)  
46 (Brendza et al., 2007; Cui and Houweling, 2002; Lochnit and Geyer, 2003). In addition, SAM provides the methyl  
47 donors necessary for DNA, RNA, histone and protein methylation. Histone methylation, especially histone H3  
48 tri-methylation at lysine 4 (H3K4me3), which is associated with active gene expression, is particularly sensitive  
49 to SAM levels (Ding et al., 2015; Mentch et al., 2015; Shyh-Chang et al., 2013).

50 In this study, we have used the nematode *C. elegans* to investigate the nutritional impact of a bacterial diet  
51 on development. *E. coli* OP50 is the commonly used bacterial diet, which is low in vitamin B12. *Comamonas*  
52 *aquosa* DA1877, on the other hand, is a vitamin B12-rich diet (Watson et al., 2014). A DA1877 diet affects  
53 different aspects of *C. elegans* behavior by modulating gene expression, reproduction and longevity (MacNeil et  
54 al., 2013; Watson et al., 2013). The vitamin B12 metabolism also regulates H3K4 methylation (Ding et al., 2015),  
55 affecting *C. elegans* fertility and lipid accumulation, which is linked to longevity (Ding et al., 2018; Greer et al.,  
56 2010; Xiao et al., 2011).

57 Here, we focused on how the vitamin B12-dependent one-carbon metabolism modulates cell fate decisions  
58 mediated by the conserved RAS/Mitogen-activated protein kinase (RAS/MAPK) pathway. The RAS/MAPK  
59 pathway is highly conserved between *C. elegans* and mammals, and it is a prevalent oncogenic signaling pathway  
60 in humans, being hyper-activated in around one-third of all tumors. Gain-of-function (*gf*) mutations in RAS genes  
61 (mostly in KRAS) occur in 30% of all cancers, and mutations in BRAF (mostly the V600E substitution) are found  
62 in 8% of all human cancers (Guo et al., 2020; Liu et al., 2018; Schubbert et al., 2007). Gain-of-function mutations  
63 in *let-60*, the single *C. elegans* *ras* ortholog, hyperactivate RAS/MAPK signaling and cause enhanced germ cell  
64 death, oocyte over-production and excess vulval induction (Cha et al., 2012; Church et al., 1995; Han et al., 1990;  
65 Lee et al., 2007; Sternberg and Han, 1998).

66 During larval development, the growth factor LIN-3 (an EGF-like ligand) is secreted by the gonadal anchor  
67 cell (AC). LIN-3 activates RAS/MAPK signaling via the LET-23 EGF receptor in the vulval precursor cells (VPCs)  
68 to induce their differentiation (Greenwald, 1997; Gupta et al., 2012; Schindler and Sherwood, 2013). P6.p, the

69 VPC closest to the AC, receives the highest concentration of LIN-3 and adopts the primary (1°) vulval cell fate,  
70 while P5.p and P7.p receive less LIN-3 signal and adopt the secondary (2°) cell fate in response to a lateral LIN-  
71 12 Notch signal. These three induced VPCs then start to proliferate and differentiate into 22 vulval cells forming  
72 the vulva (Greenwald, 1997; Gupta et al., 2012; Schindler and Sherwood, 2013).

73 During adulthood, RAS/MAPK regulates germ cell progression and death in the gonads. Hermaphrodites  
74 have two symmetric, U-shaped tubular gonad arms that are connected to a common uterus. In the distal region of  
75 each gonad arm, mitotic stem cells constantly proliferate to supply new germ cells. Germ cells in the late  
76 pachytene region, near the gonad loop, activate the RAS/MAPK pathway, which is required for the pachytene to  
77 diplotene transition, cell membrane integrity, chromosomal synapsis, apoptosis and oocyte differentiation (Arur  
78 et al., 2011; Church et al., 1995; Das et al., 2020; Lee et al., 2007). Around half of the germ cells enter the proximal  
79 gonad arm and begin to differentiate into oocytes, while the remaining germ cells undergo apoptosis. Germ cell  
80 apoptosis is a physiological and stochastic process that eliminates half of all germ cells to maintain gonad  
81 homeostasis (Gumienny et al., 1999; Wang and Yang, 2016). Dying germ cells activate the core apoptotic  
82 machinery triggering the CED-3 caspase (Gumienny et al., 1999; Wang and Yang, 2016) and are engulfed by the  
83 sheath cells of the somatic gonad, which express the CED-1 receptor mediating their recognition (Zhou et al.,  
84 2001).

85 By examining three RAS/MAPK-mediated phenotypes, vulval development, germ cell death and oocyte  
86 differentiation, we show that the activity of the vitamin B12-dependent one-carbon metabolism is a limiting factor  
87 for RAS/MAPK-induced cell fates. Switching animals to a vitamin B12-rich DA1877 diet enhances all  
88 phenotypes caused by hyperactive RAS/MAPK signaling via the methionine synthetase METR-1. The one-carbon  
89 metabolism affects the different RAS/MAPK-mediated cell fate decisions through distinct, tissue-specific  
90 mechanisms. The folate cycle promotes germ cell differentiation and death through nucleotide biosynthesis, while  
91 the methionine cycle affects vulval induction by repressing fatty acid synthesis. In addition, the methionine cycle  
92 regulates the PC metabolism, which in turn increases global H3K4me3 levels affecting all tissues. Finally, using  
93 mammalian cells carrying different activating KRAS mutations, we show that the methionine-dependency of  
94 RAS/MAPK-induced phenotypes is conserved.

95

## 96 **Results**

### 97 **A vitamin B12-rich diet enhances germ cell apoptosis, oocyte differentiation and vulval induction**

98 To investigate how the vitamin B12 metabolism affects RAS/MAPK-controlled cell fate decisions, we fed  
99 animals with the DA1877 diet, rich in vitamin B12, and quantified germ cell death, oocyte and VPC differentiation  
100 (**Figure 1B**). Using a CED-1::GFP reporter to label engulfed apoptotic cells (Derry et al., 2001), we found that  
101 wild-type worms fed with the DA1877 diet had a 2 to 3-fold increase in apoptotic germ cells, and more oocytes  
102 in the proximal gonad arm (**Figures 1C and 1D**). Supplementing vitamin B12 to animals grown on OP50 bacteria  
103 likewise increased germ cell apoptosis and oocyte numbers (**Figures 1C and 1D**).

104 Since DA1877-fed worms reach adulthood on average 12 hours earlier (**Figure S1A**) (Watson et al., 2013),  
105 we tested whether these effects were due to changes in developmental timing. Sixty-two hours after L1 arrest,  
106 DA1877-fed animals were approximately at the same developmental stage as animals fed on OP50 for 72 hours.  
107 However, DA1877-fed worms had more apoptotic corpses and oocytes than OP50-fed animals at the matching

Laranjeira et al. 2023

108 developmental stages (i.e., 62 vs. 72h, **Figures S1B and S1C**), suggesting that the DA1877 effects are independent  
109 of developmental time.

110 Germ cell apoptosis can either be physiological or a response to DNA damage (Gartner et al., 2000;  
111 Gumienny et al., 1999). To distinguish between these two possibilities, we used *cep-1* loss-of-function (*lf*) mutants,  
112 which do not induce DNA damage-induced apoptosis (Derry et al., 2001). The effect of the DA1877 diet on germ  
113 cell death was still present in *cep-1(lf)* mutants (**Figure S1D**). We also examined *pch-2(lf)* mutants (Kohlbrenner  
114 et al., 2023) to exclude that the enhanced germ cell apoptosis in DA1877-fed animals was due to defects in  
115 synaptonemal complex assembly (**Figure S1E**). Thus, the DA1877 diet enhances physiological germ cell death.  
116 In contrast, a *ced-3(lf)* mutation completely suppressed the effect of the DA1877 diet, indicating that the canonical  
117 apoptotic caspase pathway is activated by the diet (**Figure S1F**).

118 To study the effect of the DA1877 diet on VPC induction during vulval development, we used a *let-60 ras*  
119 gain-of-function mutation (*let-60(n1046)*, abbreviated *let-60(gf)*), as a sensitized genetic background. *let-60(gf)*  
120 animals grown on OP50 contained on average  $4.3 \pm 0.9$  (SD) induced VPCs per animal (vulval induction index).  
121 *let-60(gf)* larvae fed with DA1877 or supplemented with vitamin B12 showed an increase in vulval induction to  
122  $5.0 \pm 0.7$  and  $5.0 \pm 0.8$ , respectively (**Figure 1E**). Wild-type larvae always had three induced VPCs irrespective of  
123 the bacterial diet.

124 To test if the effect of the DA1877 diet was caused by bacterially produced B12, we used the B12 synthesis-  
125 deficient DA1877 mutants  $\Delta cbiA/cobB$  and  $\Delta cbiB$  (Watson et al., 2014). Germ cell apoptosis in animals fed with  
126 DA1877  $\Delta cbiA/cobB$  or  $\Delta cbiB$  mutants was comparable to OP50-fed animals, indicating that the increase in  
127 dietary B12 is the main cause for the enhanced apoptosis (**Figure S1G**). To determine, which metabolic pathway  
128 (i.e., the propionate breakdown or the one-carbon metabolism) mediates the effects of the DA1877 diet or B12  
129 supplementation, we examined *metr-1(lf)* and *mmcm-1(lf)* mutants. Both mutations suppressed the effect of the  
130 DA1877 diet and vitamin B12 on germ cell apoptosis and oocyte differentiation, though the suppression by *mmcm-*  
131 *1(lf)* was weaker (**Figures 1F, 1G, 1I and 1J**). Only *metr-1(lf)* mutants showed a reduction in VPC induction in  
132 animals fed with the DA1877 diet or supplemented with vitamin B12 (**Figures 1H and 1K**). To determine if the  
133 effects of vitamin B12 on germ cell differentiation are cell-autonomous, we expressed *metr-1* and *mmcm-1* in the  
134 soma using extra-chromosomal arrays, which are silenced in the germline. The somatic expression of *metr-1*  
135 rescued the reduced vulval induction in *let-60(gf)* double mutants (**Figure S1H**), but the somatic expression of  
136 *metr-1* or *mmcm-1* did not affect germ cell death on the DA1877 diet (**Figure S1I**).

137 Lastly, we examined duct cell specification during larval development as a fourth phenotype controlled by  
138 RAS/MAPK signaling (Sternberg and Han, 1998). Eighty-one percent of *let-60(gf)* animals fed with OP50 showed  
139 a duplication of the duct cell, whereas 98% of the animals fed with the DA1877 diet had two duct cells (**Figures**  
140 **S1J and S1J'**).

141 In conclusion, the vitamin B12-dependent one-carbon metabolism is the main factor enhancing multiple  
142 RAS/MAPK-induced cell fates on the DA1877 diet.

143

#### 144 **A vitamin B12-rich diet increases germ cell number and accelerates pachytene progression**

145 Given that the DA1877 diet affected both germ cell death and oocyte differentiation, we tried to decouple  
146 the two phenotypes. Using apoptosis-deficient *ced-3(lf)* mutants, we found that the increase in oocyte number in

147 DA1877-fed worms was independent of apoptosis (**Figure 2A**). However, we were not able to determine if the  
148 reverse was also true.

149 The mitotic proliferation of germline stem cells in the distal gonad region depends on RAS/MAPK signaling  
150 in the soma (Robinson-Thiewes et al., 2021). We therefore tested if the DA1877 diet up-regulates germ cell  
151 proliferation, which would increase germ cell number and potentially apoptosis. The mitotic index (i.e. the fraction  
152 of M-phase germ cells in the mitotic region) in adult animals was not changed by the DA1877 diet, by somatic  
153 hyper-activation of RAS/MAPK, or by loss of *metr-1* (**Figure 2B**). However, DA1877-fed worms contained a  
154 longer mitotic zone with more mitotic cells and an increased absolute number of cells in M-phase (**Figure S2A**),  
155 which is consistent with the overall increase in gonad size observed in DA1877-fed animals. By contrast, *let-60(gf)*  
156 and *metr-1(lf)* mutants contained a shorter mitotic zone (**Figure S2A**). This suggests that the DA1877 diet may  
157 affect the germline by expanding the pool of mitotic cells earlier during larval development without increasing  
158 the mitotic rate during adulthood. Thus, accelerated germ cell proliferation is unlikely to be responsible for the  
159 DA1877-induced increase in apoptotic corpse and oocyte numbers.

160 We next focused on the pachytene region, where RAS/MAPK activation regulates both germ cell apoptosis  
161 and pachytene exit (Church et al., 1995; Gumienny et al., 1999; Lee et al., 2007). We used an H2B::GFP marker  
162 to label the germ cell nuclei and determine the border between the pachytene and diplotene zones (P-D) (**Figure**  
163 **2C**). We counted the average number of pachytene cells over 15-cell rows distal to the P-D border. DA1877-fed  
164 animals contained more pachytene germ cells (**Figure 2D**), consistent with an enlarged gonad. To hyper-activate  
165 RAS/MAPK signaling in the germline, we examined temperature-sensitive *let-60(ga89)* mutants, abbreviated *let-*  
166 *60(gf<sup>ts</sup>)*, grown for 4 hours at 25°C (Eisenmann and Kim, 1997). The *let-60(gf<sup>ts</sup>)* and *metr-1(lf)* mutations did not  
167 significantly alter germ cell number (**Figure 2D**). DA1877-fed worm and *let-60(gf<sup>ts</sup>)* mutants also showed an  
168 increased density of pachytene cells (i.e., shorter 15-cell rows), but cell density was not changed in *metr-1(lf)*  
169 mutants (**Figure 2E**). Thus, neither cell number nor density seems to correlate with germ cell apoptosis or oocyte  
170 differentiation. However, DA1877-fed worms showed a distal shift of the P-D border before the loop, whereas  
171 *let-60(gf<sup>ts</sup>)* mutants showed a proximal shift after the loop (**Figures 2C and 2F**).

172 The distal shift of the P-D border in DA1877-fed worms might be due to a change in germline length, a shift  
173 of the borders between the different meiotic zones, or altered dynamics of the germ cells progressing through the  
174 gonads. Immunohistochemical staining of dissected gonads with markers for the different meiotic zones indicated  
175 that the boundary between the transition zone and early pachytene was shifted distally in DA1877-fed animals  
176 (when corrected for different gonad length), but the proximal border of the late pachytene zone was not changed  
177 (**Figure S2B**). By contrast, the nuclear morphology visualized with the H2B::GFP marker pointed to a distal shift  
178 of the P-D border (**Figure 2C and 2F**). In agreement with previous results (Das et al., 2020), *let-60(gf<sup>ts</sup>)* worms  
179 had a shorter mid-pachytene zone and no change in the proximal border of the late pachytene zone, despite the  
180 proximal shift of the P-D border determined with the H2B::GFP marker (**Figure S2B and Figures 2C and 2F**).  
181 This suggests that the different meiotic zones determined by molecular markers do not always match the meiotic  
182 stage of individual germ cells scored by their nuclear morphology.

183 We therefore hypothesized that the changes in germ cell death and differentiation caused by the DA1877 diet  
184 or the *let-60(gf<sup>ts</sup>)* mutation might be caused by an altered speed, at which individual germ cells move through the  
185 different meiotic zones. We tracked individual germ cell nuclei progressing from pachytene to diplotene by live  
186 imaging (Berger et al., 2018). Germ cells progressed faster through the pachytene region in DA1877-fed animals



187 and *let-60(gf<sup>ts</sup>)* mutants (**Figure 2G** and **Figure S3A** and **S3B** for the individual tracking). Moreover, DA1877-  
188 fed worms ovulated more frequently (**Figure 2H** and **Figure S3C** for the individual tracking), indicating that the  
189 higher oocyte number is not due to reduced ovulation.

190 In summary, the DA1877 diet or hyper-activation of the RAS/MAPK pathway resulted in a faster progression  
191 of germ cells through pachytene, which could explain the increased number of oocytes in the proximal gonads.  
192 Whether the accelerated progression through pachytene might also increase the rate of germ cell apoptosis is  
193 unclear. It seems more likely that the combination of the changes in gonad morphology and dynamics caused by  
194 the DA1877 diet accounts for the increase in germ cell death.

195

### 196 **The one-carbon metabolism enhances RAS/MAPK target gene expression rather than pathway activity**

197 To characterize the interactions between the one-carbon metabolism and RAS/MAPK signaling, we  
198 combined the *metr-1(lf)* and *let-60(gf)* mutations. *metr-1(lf)* rescued the *let-60(gf<sup>ts</sup>)*-dependent increase in germ  
199 cell apoptosis and oocyte number in animals fed with OP50, even in germline-specific *metr-1(lf)* mutants rescued  
200 in the soma with an extra-chromosomal array (**Figures 3A** and **3B** and **Figures S4A** and **S4B**). Furthermore, the  
201 gonads in *let-60(gf<sup>ts</sup>)* animals grown for 18 hours at 25°C shrank, resulting in a reduced rachis diameter, which  
202 was suppressed by *metr-1(lf)* (**Figure 3C**) (Kohlbrenner et al., 2023; Lee et al., 2007). Also, the increased VPC  
203 differentiation in *let-60(gf)* mutants fed with OP50 was suppressed by *metr-1(lf)* (**Figures 3D** and **1H**). Together,  
204 these results show that inhibiting the methionine cycle reduces the penetrance of phenotypes caused by  
205 RAS/MAPK hyper-activation in different tissues. On the other hand, the DA1877 diet enhanced the effects of *let-*  
206 *60(gf<sup>ts</sup>)* on germ cell apoptosis and oocyte differentiation (**Figures 3E** and **3F**). To examine the influence of the  
207 DA1877 diet on reduced RAS/MAPK signaling, we used the temperature-sensitive *mpk-1(ga111<sup>ts</sup>)* allele (Lackner  
208 and Kim, 1998), rescued in the soma with an extra-chromosomal *mpk-1(+)* array to inhibit RAS/MAPK  
209 specifically in the germline (Kohlbrenner et al., 2023). The reduced germ cell apoptosis and oocyte number in  
210 germline-specific *mpk-1(lf<sup>ts</sup>)* mutants were partially suppressed by the DA1877 diet (**Figures 3G** and **3H**). This  
211 suggested that the RAS/MAPK pathway and the methionine cycle have synergistic effects, or that the methionine  
212 cycle performs a limiting function downstream of the RAS/MAPK pathway.

213 We next examined if the methionine cycle directly regulates RAS/MAPK pathway activity. Neither  
214 immunostaining of dissected gonads nor Western blot analysis of total animal extracts with a di-phospho-ERK-  
215 specific antibody showed an increase in MAPK phosphorylation in animals fed with the DA1877 diet (**Figure 3I**  
216 and **3J**, see **Figure S4C** for the Western blots used for quantification). Accordingly, *metr-1(lf)* did not cause a  
217 decrease in MAPK phosphorylation (**Figures S4D** and **S4E**). Using an ERK biosensor to quantify RAS/MAPK  
218 pathway activity in the VPCs (de la Cova et al., 2017), we observed no significant difference in activity between  
219 worms fed with the OP50 or DA1877 diet (**Figure 3K**). Together, these results indicate that the DA1877 diet does  
220 not increase RAS/MAPK pathway activity but rather the cellular responses to MAPK activation.

221 We thus tested whether the DA1877 diet changes the expression of RAS/MAPK signaling target genes during  
222 vulval development. We used endogenous GFP reporters for *lin-1*, which encodes an ETS-family transcription  
223 factor phosphorylated by MPK-1, and *lin-39*, which encodes a *hox* gene regulated by LIN-1 (Dave et al., 1998;  
224 Sundaram, 2013). The DA1877 diet increased LIN-1::GFP and LIN-39::GFP expression in the proximal VPCs of  
225 *let-60(gf)* larvae (**Figures 3L** and **3M**), but it had no significant effect in wild-type worms (**Figures S4F** and **S4G**).

Laranjeira et al. 2023

226 Thus, the interaction between the methionine cycle and the RAS/MAPK pathway most likely occurs at the  
227 level of the target genes. Furthermore, the methionine cycle appears to limit vulval induction only in the context  
228 of a hyper-activated RAS/MAPK pathway.

229

### 230 **Tissue-specific effects of one-carbon metabolites on RAS/MAPK-mediated cell fates**

231 To characterize the effects of bacterial diet on the metabolism, we used liquid chromatography mass  
232 spectrometry (LC-MS) analysis to measure metabolite levels in animals fed with the OP50 or DA1877 diet. We  
233 focused on vitamin B12-related metabolic pathways and found that the DA1877 diet, as expected, increased the  
234 levels of one-carbon metabolites (**Figure 4A, Table S1 and Figure S5A**). Particularly, methionine,  
235 phosphatidylcholine (PC) and nucleotide levels were increased in DA1877-fed wild-type animals (**Figure S5A**)  
236 (Giese et al., 2020). Interestingly, *let-60(gf<sup>ts</sup>)* mutants fed with the DA1877 diet contained lower levels of one-  
237 carbon metabolites than wild-type animals on DA1877 (**Figure 4A and S5A**).

238 To test if supplementing one-carbon metabolites reproduced the dietary effects on germ cells and VPC  
239 differentiation, we supplemented the growth medium with folinic acid, methionine and choline (bold in **Figure**  
240 **1A**). Wild-type animals fed with OP50 and exposed to one of the three metabolites had more apoptotic corpses  
241 and oocytes (**Figures 4B and 4C**). Moreover, each of the three metabolites was sufficient to bypass the inhibitory  
242 effects of *metr-1(lf)* on germ cell differentiation (**Figures 4B and 4C**). Only choline significantly enhanced VPC  
243 induction in *let-60(gf)* single mutants, but methionine and choline both reversed the effect of *metr-1(lf)* on vulval  
244 induction (**Figure 4D**). In contrast, folinic acid did not affect vulval induction (**Figure 4D**).

245 Since the folate cycle is involved in nucleotide production, we tested two bacterial strains that produce more  
246 nucleotides, *E. coli* OP50 *cytR<sup>-</sup>* and *E. coli* HT115 (Chi et al., 2016). In the wild-type background, both strains  
247 enhanced germ cell apoptosis and oocyte differentiation (**Figures S5B and S5C**). Since *metr-1(lf)* worms were  
248 not viable when grown on these two bacterial strains, we examined somatically rescued *metr-1(lf)* mutants, which  
249 showed an increase in apoptotic corpse and oocyte numbers when fed with *cytR<sup>-</sup>* or HT115 (**Figures S5B and**  
250 **S5C**), suggesting that nucleotide levels affect both processes. Vulval induction, on the other hand, was not  
251 enhanced by the two nucleotide-rich bacterial strains (**Figure S5D**). Furthermore, supplementing the growth  
252 medium with nucleosides caused an increase in apoptotic corpses and oocyte numbers in both wild-type animals  
253 and somatically rescued *metr-1(lf)* mutants (**Figures 4E and 4F**), but did not affect vulval induction (**Figure 4G**).

254 Similar to the DA1877 diet, supplementing choline or nucleosides partially suppressed the effects of  
255 germline-specific loss of *mpk-1* on germ cell apoptosis and oocyte development (**Figures S5E and S5F**),  
256 indicating that these metabolites enhance RAS/MAPK signaling. Taken together, folate and methionine cycle  
257 metabolites affect germ cell differentiation and death, whereas vulval induction is only sensitive to methionine  
258 cycle metabolites.

259 Phosphatidylcholine (PC) biosynthesis depends on choline (the Kennedy/CDP-choline pathway) and methyl  
260 groups provided by the methionine cycle to methylate phosphatidylethanolamine (PE) (**Figure 1A**). Since choline  
261 supplementation had a strong effect on all processes examined (**Figure 4B-D**), we hypothesize that PC levels  
262 might regulate germ cell and VPC differentiation. PC produced via the SAM-dependent pathway requires the *pmt-*  
263 *1* and *pmt-2* methyltransferases, while the choline-dependent pathway involves *cka-1* and *cept-1* activity (Brendza  
264 et al., 2007; Walker et al., 2011) (**Figure 1A**). We therefore used RNAi to test if the two PC synthesis pathways  
265 are necessary for the vitamin B12 effect on RAS/MAPK-controlled cell fates. Down-regulation of either *cka-1* or



266 *cept-1* suppressed the vitamin B12-dependent increase in oocyte number and vulval induction (**Figures 4H** and  
267 **4I**). Due to the loss of the CED-1::GFP reporter signal in RNAi-treated animals, we could not score germ cell  
268 apoptosis. Since *pmt-2* RNAi induced larval arrest, we treated larvae with *pmt-2* RNAi bacteria diluted with empty  
269 vector (EV) starting at the L1 stage or exposed L4 larvae to undiluted *pmt-2* RNAi bacteria. In both treatments,  
270 *pmt-2* RNAi caused a reduction in oocyte number of wild-type animals supplemented with vitamin B12 (**Figure**  
271 **4J**). *pmt-2* RNAi also reduced vulval induction in *let-60(gf)* animals supplemented with vitamin B12 (**Figure 4K**).

272 Together, these findings indicate that PC biosynthesis mediates the effects of vitamin B12 supplementation  
273 on oocyte and VPC differentiation, suggesting that the effects of choline are mediated by PC.

274

### 275 **The methionine cycle modulates VPC differentiation by repressing lipid metabolism**

276 Since the one-carbon metabolism positively regulates germline and vulval development, and the DA1877  
277 diet alters gene expression (Giese et al., 2020; MacNeil et al., 2013), we hypothesized that the DA1877 diet  
278 enhances germ cell and VPC differentiation by changing the expression of genes that modulate the cellular  
279 responses to RAS/MAPK signaling. RNAseq analysis of adult wild-type and *let-60(gf<sup>ts</sup>)* animals fed with the  
280 OP50 or DA1877 diet identified in total 389 significantly down-regulated and 394 significantly up-regulated genes  
281 in DA1877-fed animals (**Figures 5A, 5B** and **Table S2**). In contrast to the metabolite levels, the DA1877 diet  
282 caused similar changes in the transcriptome of wild-type and *let-60(gf<sup>ts</sup>)* worms (**Figure 5B**). Specifically, vitamin  
283 B12-, methionine cycle- and PC biosynthesis-related genes (*nhr-114*, *pmp-5*, *metr-1*, *sams-1*, *pmt-1* and *pmt-2*)  
284 were down-regulated in DA1877-fed worms (**Figures 5A, 5B** and **S6A**), suggesting a negative feedback response  
285 to increased levels of dietary vitamin B12 (Giese et al., 2020; MacNeil et al., 2013). Furthermore, we did not  
286 detect significant changes in the expression levels of RAS/MAPK pathway genes (**Figure S6A**). Pathway network  
287 analysis showed that the DA1877 diet regulates several genes involved in innate immune response and fatty acid  
288 biosynthesis (*fat-5*, *fat-6* and *fat-7*) (**Figure S6B**). Previous work has shown that diet-induced changes in gene  
289 expression can differ between young and gravid adult worms (MacNeil et al., 2013). We therefore tested if the  
290 DA1877 diet might influence gene expression in an age-dependent manner. We performed transcriptomic analysis  
291 of wild-type and *let-60(gf)* larvae at the mid-L3 stage, the stage when vulval induction occurs. The larval  
292 transcriptome showed smaller but similar changes in gene expression as observed in adults, as SAM, PC and fatty  
293 acid metabolism were also among the most strongly affected pathways in L3 larvae (**Figure S7A-C** and **Table**  
294 **S3**). We did not observe significant changes in *lin-1* and *lin-39* expression (**Figure S7C**), possibly because bulk  
295 RNAseq may not be sensitive enough to detect tissue-specific changes.

296 Previous work established a connection between vitamin B12, the methionine cycle and fat metabolism (Qin  
297 et al., 2022; Walker et al., 2011; Zhu et al., 2018). Given that genes controlling the lipid metabolism (i.e., the lipid  
298  $\Delta^9$ -desaturases *fat-5*, *fat-6* and *fat-7*) were among the most strongly down-regulated genes, we explored the effect  
299 of the DA1877 diet on the lipid metabolism and its consequences on RAS/MAPK-induced cell fates.  
300 Quantification of lipid droplet size using the *dhs-3::gfp* reporter (Zhang et al., 2012) indicated that the intestines  
301 of DA1877-fed animals contained smaller lipid droplets than OP50-fed animals (**Figures 5C** and **5C'**). Choline  
302 supplementation had a similar effect (**Figures 5C** and **5C'**), suggesting the DA1877 diet's effect on lipid droplet  
303 size is choline-dependent. The *fat* genes are involved in different fatty acid desaturation and elongation pathways.  
304 *fat-5* is responsible for palmitoleic acid (C16:1n7) production, whereas *fat-6* and *fat-7* are responsible for oleic  
305 acid (C18:1n9) (Watts, 2009; Watts and Ristow, 2017). We tested if *fat-5*, *fat-6* or *fat-7* RNAi affected vulval

Laranjeira et al. 2023

306 induction and oocyte differentiation. Single or double knock-down of *fat-6* and *fat-7* increased vulval induction  
307 in *let-60(gf)* animals to a similar degree as the DA1877 diet, but *fat-5* knock-down had no significant effect  
308 (**Figure 5D**). Oocyte development was not affected by *fat-5*, *fat-6* or *fat-7* RNAi (**Figure 5E**). Finally, we  
309 supplemented palmitoleic acid and sodium oleate to animals fed with OP50 or DA1877. Oocyte differentiation  
310 was not changed by fatty acid supplementation, irrespective of the diet (**Figures 5F** and **5G**). However,  
311 supplementing sodium oleate to *let-60(gf)* animals fed with the DA1877 diet reduced vulval induction to the levels  
312 observed in OP50-fed animals (**Figures 5H** and **5I**).

313 In summary, the down-regulation of unsaturated fatty acid biosynthesis by the DA1877 diet, especially oleic  
314 acid, positively regulated vulval induction, but it did not affect germ cell differentiation.

315

### 316 **A vitamin B12-rich diet increases global histone H3K4 tri-methylation to regulate VPC and oocyte** 317 **differentiation**

318 Since the methionine cycle is the main methyl donor in cells, we investigated whether changes in histone  
319 methylation might regulate germ cell and VPC differentiation. We focused on histone H3K4me3 because this type  
320 of histone modification is sensitive to diet, particularly a high-fat diet (Wan et al., 2022), as well as changes in  
321 methionine cycle activity (Ding et al., 2015, 2018; Godbole et al., 2023; Li et al., 2015). Western blot analysis  
322 showed higher global H3K4me3 levels in worms fed with DA1877 or supplemented with choline, and slightly  
323 reduced levels in *metr-1(lf)* mutants fed with OP50 (**Figure 6A**). Since the DA1877 diet down-regulated fat  
324 biosynthesis (**Figure 5C**), we tested if inhibiting *fat* genes affected histone methylation. H3K4me3 levels did not  
325 increase after *fat-6* or *fat-7* single or double RNAi, indicating that the oleic acid metabolism does not regulate  
326 H3K4me3 levels (**Figure 6B**).

327 To test if the increase in H3K4me3 levels caused by the DA1877 diet contributed to vulval induction and  
328 germ cell differentiation, we inhibited by RNAi the four H3K4 demethylases *amx-1*, *lsd-1*, *rbr-2* and *spr-5* (which  
329 might mimic the DA1877 diet in OP50-fed animals) and the four H3K4 methylases *ash-2*, *set-2*, *set-16* and *wdr-5.1*  
330 (which might suppress the vitamin B12 effect). RNAi of the demethylases *amx-1* and *spr-5* increased, and  
331 RNAi of the methylase *wdr-5.1* decreased vulval induction in *let-60(gf)* animals supplemented with vitamin B12  
332 (**Figure 6C**). Oocyte differentiation was also increased by *amx-1*, *lsd-1* and *spr-5* RNAi and decreased by *set-2*  
333 and *wdr-5.1* RNAi (**Figure 6D**).

334 We conclude that a vitamin B12-rich diet causes a global increase in H3K4me3 levels, which contributes to  
335 the enhancement of RAS/MAPK-induced vulval induction and oocyte differentiation.

336

### 337 **Methionine-dependency of mammalian cells carrying activating KRAS and BRAF mutations**

338 To investigate if the role of the methionine cycle in regulating RAS/MAPK-induced cell fates is conserved  
339 in mammals, we cultured human cancer cell lines carrying activating mutations in KRAS in medium containing  
340 varying methionine concentrations. We first performed collective cell migration assays with A549 lung cancer  
341 cells that carry a KRAS G12S mutation, to test if methionine restriction (MR) interfered with cell migration. To  
342 exclude possible effects of reduced cell proliferation, we performed these assays with cells arrested in the G1  
343 phase by double thymidine blockade (Haag et al., 2020). A549 cells grown in MR (without methionine but  
344 supplemented with its precursor homocysteine) migrated at a lower speed than cells without MR (**Figures 7A, 7A'**  
345 and **7A''**). The addition of the MEK kinase inhibitors MEK162 and LGX818 without MR reversibly blocked cell

346 migration, indicating that RAS/MAPK signaling is essential for the migration of A549 cells (**Figure 7A, 7A'** and  
347 **7A''**). Removal of the MEK inhibitors 8 hours after starting the assay allowed the cells to resume migration  
348 (**Figure 7A-A'**), indicating that the reduced migration after blocking the RAS/MAPK signaling was not due to  
349 increased cell death.

350 We next used A431 epidermoid carcinoma cells, which overexpress EGFR and strongly respond to EGF  
351 stimulation by forming filopodia in a MAPK-dependent manner (Haag et al., 2020; Van de Vijver et al., 1991).  
352 Since filopodia formation is difficult to assess quantitatively, we categorized cellular morphologies into three  
353 classes; 0 for cells without filopodia, 1 for cells with small filopodia covering part of the cortex, and 2 for cells  
354 with long filopodia covering most of the cortex (**Figure S8A**). Class 1 and 2 cells were scored as stimulated and  
355 class 0 cells as unstimulated. Without EGF stimulation, most cells did not form filopodia, while 90% of the cells  
356 stimulated with EGF in the presence of methionine formed filopodia (**Figures 7B, 7B'** and **S8B**). By contrast, 55%  
357 of cells with MR and stimulated with EGF did not form filopodia (**Figures 7B, 7B'** and **S8B**), indicating that  
358 methionine is required for A431 cells to fully respond to EGF stimulation. Treatment with the MEK162 and  
359 LGX818 inhibitors in the presence of methionine strongly reduced EGF-induced filopodia formation (**Figures 7B**  
360 **and 7B'**).

361 Since cancer cell lines such as A459 carry many additional mutations besides the KRAS mutations, we used  
362 primary mouse embryonic fibroblasts (MEFs) in which the three RAS genes had been deleted and replaced with  
363 vectors expressing wild-type, G12C, G12V KRAS or V600E BRAF in the same genetic background (Drosten et  
364 al., 2010). Without MR, the KRAS mutant MEFs arrested in G1 showed the same migration speed as KRAS wild-  
365 type control cells (**Figures 7C and 7C'**). In contrast, KRAS G12V and G12C cells grown with MR migrated  
366 significantly slower, whereas KRAS wild-type MEFs migrated at the same speed with or without MR (**Figures**  
367 **7D and 7D'**). V600E BRAF mutant MEFs showed a similar effect, though the reduction in migration caused by  
368 MR was smaller.

369 Taken together, these results suggested that the methionine-dependency of RAS/MAPK-induced phenotypes  
370 is conserved in mammalian cells.

371

## 372 **Discussion**

373 Diet has a major impact on the cellular metabolism. Therefore, cells must adapt their metabolism to the  
374 available nutrition to ensure survival in changing environments. Here, we focused on the vitamin B12-dependent  
375 one-carbon metabolism and its effects on cell fate decisions controlled by the oncogenic RAS/MAPK signaling  
376 pathway in *C. elegans* (**Figure 6E**). A bacterial diet rich in vitamin B12 (DA1877) or direct vitamin B12  
377 supplementation enhanced germ cell apoptosis, oocyte differentiation and VPC induction, which are all controlled  
378 by the RAS/MAPK pathway. Different one-carbon metabolites have tissue-specific effects, as the folate cycle  
379 only affected germline development, while methionine cycle metabolites enhanced all RAS/MAPK-induced  
380 phenotypes. Choline and phosphatidylcholine (PC) are key mediators of vitamin B12-dependent effects by  
381 regulating histone H3K4me3 methylation and repressing fatty acid biosynthesis (**Figure 6E**). We thus propose  
382 that methionine cycle activity is a limiting factor for different phenotypes caused by RAS/MAPK hyper-activation,  
383 by modulating the expression of downstream RAS/MAPK target genes. Finally, we show that methionine cycle  
384 activity is also a limiting factor in mammalian cells carrying activating mutations in KRAS and BRAF, pointing  
385 to a conserved role of the one-carbon metabolism in regulating cell RAS/MAPK-induced cell fates.

386

387 **The folate cycle as a tissue-specific regulator of germ cell differentiation**

388 Folic acid and nucleoside supplementation positively regulated germ cell death and oocyte differentiation,  
389 but not vulval induction. Both, the purine and pyrimidine metabolism are important for cell proliferation (Chi et  
390 al., 2016; Wan et al., 2019), which could explain our observations. For example, Chaudhari et al., 2016 showed  
391 that HT115 and DA1877 diets promote germline proliferation by increasing folate levels. Accordingly, DA1877-  
392 fed animals contained more mitotic germ cells in the proliferation zone and more M-phase cells. However, the  
393 DA1877 diet did not accelerate germ cell proliferation because the number of dividing cells relative to the total  
394 number of mitotic cells remained constant in a vitamin B12-rich diet. Moreover, the increase in oocyte numbers  
395 is not linked to germ cell apoptosis. However, the vitamin B12-rich diet accelerated germ cell transition through  
396 pachytene into diakinesis. While the mechanism by which nucleosides enhance germ cell apoptosis is not clear,  
397 we hypothesize that increasing nucleoside levels could promote oocyte differentiation by facilitating maternal  
398 mRNA production. Even though the most distal oocytes in diakinesis are transcriptionally silent, pachytene-stage  
399 germ cells are extremely active in producing mRNAs and proteins, which are taken up by the growing oocytes  
400 (Huelgas-Morales and Greenstein, 2018; Pazdernik and Sched, 2013; Walker et al., 2007). Since RAS/MAPK  
401 signaling promotes oocyte differentiation by regulating HTP-1 phosphorylation, it is also possible that a vitamin  
402 B12-rich diet regulates a meiotic checkpoint established by the HORMA complex (Das et al., 2020).

403

404 **The methionine cycle and phosphatidylcholine metabolism modulate RAS/MAPK signaling in all tissues**

405 All RAS/MAPK-dependent cell fate decisions in *C. elegans* required an active methionine cycle, as  
406 evidenced by the suppression of the different *let-60 ras* phenotypes by *metr-1(lf)*. Interestingly, *let-60(gf)* animals  
407 fed with a vitamin B12-rich diet contained lower levels of methionine cycle metabolites than wild-type animals,  
408 while the levels of the transcripts encoding methionine cycle enzymes were not affected. It thus seems likely that  
409 *let-60(gf)* animals can produce these metabolites but consume them more rapidly, suggesting that hyper-activation  
410 of the RAS/MAPK pathway results in an increased dependency on methionine cycle metabolites.

411 The effects of the vitamin B12-rich diet are associated with increased choline and PC levels. PC biosynthesis  
412 and the RAS/MAPK pathway were previously connected in the context of *uv1* cell survival under excitotoxic cell  
413 death (Crook et al., 2016). Hyper-activation of the RAS/MAPK pathway by LET-23 EGFR leads to *uv1* cell  
414 survival, which requires PC biosynthesis. Additionally, choline, phosphocholine and PC levels rise in cancer cells  
415 because many enzymes of the choline metabolism are up-regulated by RAS/MAPK signaling (Glunde et al., 2011).

416 Choline supplementation not only increased vulval induction but also enhanced physiological germ cell  
417 death and oocyte differentiation. PC levels have previously been associated with apoptosis, with low levels of  
418 choline or PC-inducing apoptosis (Anthony et al., 1999; Cui and Houweling, 2002). However, apoptosis induced  
419 by choline deficiency is mediated by ceramide signaling and is mostly associated with stress- or radiation-induced  
420 apoptosis (Cui and Houweling, 2002; Yang et al., 2021; Yuan et al., 2021; Deng et al., 2008). In this context, our  
421 results point to a regulatory mechanism of physiological apoptosis controlled by choline metabolism. Given that  
422 PC is one of the most abundant phospholipids in cell membranes and that RAS/MAPK signaling is required for  
423 membrane integrity during oogenesis (Arur et al., 2011), choline could promote oocyte production by facilitating  
424 membrane production. This is consistent with our observation that germ cells in animals fed with the DA1877  
425 diet exited pachytene faster, which may reflect a higher availability of membrane components.

426

#### 427 **Fatty acid metabolism as a signaling pathway**

428 A vitamin B12-rich diet induced the downregulation of *fat* genes. A relationship between the methionine  
429 cycle, choline and the lipid metabolism was previously reported (Li et al., 2011; Walker et al., 2011; Zhu et al.,  
430 2018). In particular, the methionine cycle and choline metabolism regulate lipogenesis in *C. elegans* via SBP-1, a  
431 homolog of the mammalian Sterol regulatory element-binding proteins (SREBPs) (Ding et al., 2015; Qin et al.,  
432 2022; Walker et al., 2011). RAS/MAPK signaling in cancer cells can also regulate SREBP activity (Glunde et al.,  
433 2011). These interactions are consistent with our data indicating that a vitamin B12-rich diet increases PC levels  
434 and reduces the size of lipid droplets in the intestine, probably by down-regulating *fat-5*, *fat-6* and *fat-7* expression.  
435 The relationship between PC and fat metabolism is not exclusive to *C. elegans*, as PC supplementation suppresses  
436 obesity-related phenotypes in mice fed with a high-fat diet (Lee et al., 2014), and a choline-deficient diet enhances  
437 liver fat levels in rats (Deminice et al., 2015).

438 Our data not only confirm the connection between the methionine cycle, choline and lipid metabolism but  
439 also show that fatty acid levels affect cell fate specification during vulval development. The fatty acid metabolism  
440 affects *C. elegans* in many ways, by regulating survival, developmental time, reproduction, ferroptosis and  
441 modulating drug effects (Brock et al., 2007; Diot et al., 2022; Goudeau et al., 2011; Lemieux and Ashrafi, 2016;  
442 Perez and Watts, 2021; Perez et al., 2020). However, our data point to specific functions of the different fatty acids,  
443 as only oleic acid inhibited VPC differentiation. Since fatty acids are known to act as signaling molecules (Dai et  
444 al., 2021; Watts and Ristow, 2017), we hypothesize that oleic acid regulates vulval development by activating a  
445 specific signaling pathway. Oleic acid is a monounsaturated fatty acid (MUFA) known for its antioxidant  
446 properties that stem from regulating pathways such as the p38 MAPK or the ROS pathway (Santa-María et al.,  
447 2023). In mice, oleic acid reduces kidney injuries by reducing inflammation via the RAS/MAPK/PPAR- $\gamma$  pathway  
448 (Zhang et al., 2022). Moreover, oleic acid has been reported to control apoptosis in rat hepatoma dRLh-84 cells  
449 (Yamasaki et al., 2008) and stimulate bovine neutrophils to function via intracellular calcium mobilization and  
450 ERK2 phosphorylation (Hidalgo et al., 2011).

451

#### 452 **Methionine cycle, choline metabolism and histone methylation**

453 A Vitamin B12-rich diet or choline supplementation increased global histone H3K4me3 levels, consistent  
454 with previous reports in worms and mammals indicating that the methionine cycle promotes H3K4 methylation  
455 (Dai et al., 2018; Kera et al., 2013; Mentch et al., 2015; Shyh-Chang et al., 2013). Also, choline can function as a  
456 methyl donor for DNA and histone methylation in mammals (Niculescu et al., 2006; Zeisel, 2011). Choline can  
457 be oxidized to betaine, providing a methyl group that is incorporated into homocysteine to regenerate SAM.  
458 However, the *C. elegans* genome does not encode an ortholog of choline oxidase (Wasmuth et al., 2008), and  
459 choline supplementation was not sufficient to bypass the reduction in H3K4me3 levels in intestinal cells caused  
460 by *sams-1* knock-down (Ding et al., 2015). Since phosphatidylethanolamine (PE) is a major consumer of methyl  
461 groups (Ye et al., 2017), SAM and thereby also H3K4me3 levels may increase if PC production is shifted to the  
462 Kennedy/CDP-choline pathway (**Figure 1A**). Thus, choline supplementation may promote histone methylation  
463 indirectly by reducing the competition for available methyl donors between histones and PE-dependent PC  
464 biosynthesis. Alternatively, choline could act directly as a methyl donor for H3K4 methylation.



Laranjeira et al. 2023

465 H3K4me3 levels regulate different aspects of worm physiology such as fertility, lifespan and fat levels in *C.*  
466 *elegans* (Greer et al., 2010; Li and Kelly, 2011; Özdemir and Steiner, 2022; Xiao et al., 2011; Han et al., 2017).  
467 The H3K4 methyltransferases SET-16 and WDR-5.1 were previously reported to regulate VPC differentiation  
468 (Fisher et al., 2010). Here, we show that only WDR-5.1 is required to mediate the effects of dietary vitamin B12,  
469 while the demethylases the AMX-1 and SPR-5 appear to counteract WDR-5.1.

470 In summary, we propose that the methionine cycle is a limiting factor for RAS/MAPK-induced phenotypes  
471 in several tissues of *C. elegans*. Enhancing methionine cycle activity may modulate chromatin accessibility of  
472 specific target genes by increasing H3K4me3 methylation of target genes and thereby enhancing the cellular  
473 responses to RAS/MAPK signaling.

474

#### 475 **Methionine-dependency of RAS/MAPK-regulated phenotypes in mammalian cells**

476 The importance of RAS/MAPK signaling for oncogenic transformation is well documented, stimulating  
477 tumor cell proliferation, migration and invasion (Guo et al., 2020; Krueger et al., 2001; Schubbert et al., 2007).  
478 Also, the methionine-dependency of cancer cells has been known since 1959 (Sugimura et al., 1959). Non-  
479 carcinogenic cell lines can proliferate in the absence of methionine (MR), while many cancer cell lines show  
480 reduced or even blocked proliferation (Chello and Bertino, 1973; Sugimura et al., 1959). The exact reason why  
481 cancer cells need methionine is not completely understood. One possible explanation is that cancer cells have a  
482 reduced ability to use endogenous methionine for SAM synthesis due to a reallocation of homocysteine to the  
483 trans-sulfuration pathway (Cavuoto and Fenech, 2012; Kaiser, 2020). It is also possible that cancer cells have an  
484 increased demand for methionine and SAM due to more methylation reactions, rendering them more sensitive to  
485 MR (Cavuoto and Fenech, 2012; Booher et al., 2012; Kaiser, 2020). A methylation check-point where SAM levels  
486 regulate cell cycle progression through interactions with MCM, Cdc6 or Cdk2, has been proposed by Booher et  
487 al. (2012). Moreover, MR decreases global histone methylation, particularly H3K4me3 levels, which could down-  
488 regulate the expression of RAS/MAPK target genes (Kera et al., 2013; Mentch et al., 2015). The relationship  
489 between the one-carbon metabolism and cancer is used for cancer therapy, as multiple chemotherapeutic drugs  
490 such as 5-fluorouracil (5-FU) or methotrexate target the one-carbon metabolism (Ducker and Rabinowitz, 2017;  
491 Newman and Maddocks, 2017).

492 Here, we show that RAS/MAPK-regulated processes such as cell migration and filopodia formation depend  
493 on methionine. Using MEFs expressing different KRAS mutations as their only source of RAS activity, we  
494 observed remarkable differences in their sensitivity to MR. In the presence of methionine, KRAS and BRAF  
495 mutant MEFs were indistinguishable from wild-type MEFs but with MR, MEFs carrying activating KRAS  
496 mutations exhibited reduced cell migration. These findings support the idea of an increased dependency of RAS-  
497 transformed cancer cells on methionine cycle metabolites and mirror our findings with *C. elegans let-60 ras(gf)*  
498 mutants, which indicated that reducing methionine cycle activity limits the strength of different phenotypes caused  
499 by RAS/MAPK hyper-activation. MR in cancer cells may attenuate RAS/MAPK signaling through one or several  
500 of the mechanisms we discovered in the *C. elegans* model, i.e. H3K4me3 methylation, increased fat biosynthesis  
501 or reduced nucleoside production. Taken together, our findings suggest that the mechanisms regulating this key  
502 carcinogenic signaling pathway by the one-carbon metabolism may be conserved between worms and mammals.



503 **STAR Methods**

504 **C. elegans culture and maintenance**

505 *C. elegans* strains were maintained at 20°C on standard nematode growth medium (NGM) plates seeded  
506 with *Escherichia coli* OP50. *C. elegans* N2 (Bristol) strain was used as wild-type (Brenner, 1974). Before an  
507 experiment, worms were synchronized by bleaching gravid adults and letting the embryos hatch without food.  
508 *Comamonas aquosa* DA1877, *E. coli* OP50, *E. coli* HT115 and *E. coli* cytR<sup>-</sup> were obtained from CGC. *C. aquosa*  
509 DA1877 ciA<sup>-</sup>/conB<sup>-</sup> and *C. aquosa* DA1877 cbiB<sup>-</sup> (Watson et al., 2014) were obtained from the Walhout lab. All  
510 bacterial strains were grown overnight at 37°C in liquid culture containing streptomycin (100 µg/ml) for DA1877,  
511 kanamycin (50 µg/ml) for cytR<sup>-</sup> and streptomycin (100 µg/ml) and gentamycin (20 µg/ml) for both DA1877  
512 mutants.

513

514 **Microscopy**

515 Live *C. elegans* were mounted either on 3% agarose pads or in custom-made microfluidic devices for high-  
516 throughput and long-term imaging (Berger et al., 2018; Spiri et al., 2022). Nomarski (DIC) and epifluorescence  
517 images were acquired on one of three microscope systems: a DMRA2 (Leica) microscope equipped with a sCMOS  
518 camera (Prime BSI, Photometrics), a multicolor fluorescence light source (Spectra, Lumencor) and a piezo  
519 objective drive (MIPOS 100 SG, Piezosystems Jena); a DMRA (Leica) microscope equipped with two sCMOS  
520 cameras (C11440-42U30 Hamamatsu), an image splitter (TwinCam, Cairn Research), a multicolor fluorescence  
521 light source (Spectra, Lumencor) and a piezo objective drive (MIPOS 100 SG, Piezosystems Jena); or an inverted  
522 Ti-U (Nikon) equipped with a sCMOS camera (Prime 95B, Photometrics), a multicolor fluorescence light source  
523 (LedHub, Omicron Laserage Laserprodukt GmbH) and a piezo objective drive (Nano-F100, Mad City Labs).  
524 Images were acquired using a 20x air objective (HC PL APO 20x/0.80, Leica), a 40x oil objective (HCX PL APO  
525 40x/1.32, Leica; CFI Plan Fluor 40X Oil, Nikon) or a 63x oil objective (HCX PL APO 63x/1.32-0.60, Leica).  
526 Confocal images were acquired on a spinning disk confocal (SDC) system consisting of a BX61 (Olympus)  
527 microscope equipped with an X-light V2 spinning disc unit, an EMCCD camera (iXon Ultra 888, Andor), two  
528 high-power LEDs (UHP-T-460-DI and UHP-T-560-DI, Prizmatix) for GFP and RFP excitation, a mercury vapor  
529 lamp (X-Cite exacter, Excelitas Technologies Corp) for DAPI, CFP and YFP excitation and a piezo objective drive  
530 (MIPOS 100 SG, Piezosystems Jena). Images were acquired using a 40x oil objective (UplanFL N 40x/1.30,  
531 Olympus) or a 60x oil objective (UPlanAPO 60x/1.40, Olympus).

532

533 **Germ cell apoptosis and oocyte numbers**

534 Unless stated otherwise, all experiments were performed in one-day-old adult animals (72 hours post L1  
535 starvation) grown at 20°C. To score germ cell apoptosis in temperature-sensitive *let-60(ga89)* (*gf<sup>ts</sup>*) animals, all  
536 worms were initially grown at 15°C and transferred to 25°C for 4 hours before corpse scoring. Germ cell apoptosis  
537 was scored using the *bclIs39[Plim-7::ced-1::gfp]* reporter (Derry et al., 2001) and quantified in one gonad arm by  
538 counting CED-1::GFP positive cells. To count oocytes with the *let-60(ga89)* (*gf<sup>ts</sup>*) allele, worms were initially  
539 grown at 20°C and transferred to 25°C for 18 hours before counting oocyte numbers. Oocytes were scored in DIC  
540 images or using the SYN-4::GFP membrane marker, counting the number of completely cellularized oocytes in  
541 the proximal gonad arm.

542

543 **Vulval induction**

544 All vulval induction experiments were conducted in the *let-60(n1046<sup>gf</sup>)* background. Vulval induction was  
545 scored in L4 animals (46-48 hours post-L1) using DIC images (Sternberg and Horvitz, 1986). The vulval induction  
546 index, the average number of induced VPCs per animal, was calculated by assigning a score of 1 to a VPC that  
547 had undergone three rounds of cell divisions, and a score of 0.5 when only one of the two VPC descendants had  
548 differentiated.

549

550 **Metabolites, nucleoside and fatty acid supplementation**

551 Vitamin B12, metabolites and nucleosides were added to freshly prepared NGM plates. Vitamin B12 was  
552 dissolved in water at 1 mM stock concentration and added at a final concentration of 64 nM unless indicated  
553 otherwise. All of the metabolites were directly added to the NGM plates at the following final concentrations: 40  
554 mM for choline, 5 mM for L-methionine, and 100  $\mu$ M for folinic acid. Nucleosides were also added directly at a  
555 final concentration of 1 mM each. Sodium oleate was likewise added directly at a final concentration of 0.1 and  
556 0.5 mM, and palmitoleic acid at a final concentration of 0.5 and 2.5 mM. For fatty acid supplementation, 1  $\mu$ M  
557 tergitol (NP40S) was included in the final mix for solubilization (Deline et al., 2013). For suppliers and catalog  
558 numbers, see **Key Resource Table**.

559

560 **Long-term image acquisition**

561 Long-term imaging experiments were performed as described by Berger et al., 2018. Briefly, OP50 or  
562 DA1877 bacteria were grown overnight at 37°C in LB medium. Bacterial cultures were then washed three times  
563 with S-Basal buffer and concentrated to 1 ml. For OP50, the bacterial culture was re-suspended in 650  $\mu$ l of  
564 Optiprep and 332  $\mu$ l of S-Basal supplemented with 1% Pluronic F127 and for DA1877 in 600  $\mu$ l of Optiprep and  
565 380  $\mu$ l of S-Basal supplemented with 1% Pluronic F127. The bacterial suspension was filtered using a 10  $\mu$ m  
566 strainer (pluriStrainer Mini 10  $\mu$ m, PluriSelect). Worms were washed three times with S-Basal before loading on  
567 the chip. Animals were loaded as described, and immobilized by the microfluidic device channel and two on-chip  
568 hydraulic valves (Berger et al., 2018). Epifluorescence images were acquired using a 40x oil objective, at an  
569 interval of 10 minutes for germ cell tracking, and 5 minutes to measure ovulation rates. Wild-type animals were  
570 imaged at 20°C, and *let-60(ga89)* animals at 25°C, with animals shifted from 20°C to 25°C two hours before the  
571 start of the experiment. The temperature was controlled ( $\pm$ 0.5°C) by either the room's air conditioning system or  
572 a microscope cage incubator (H201-T-UNIT-BL-CRYO and H201-ENCLOSURE-CRYO, Okolab).

573

574 **Germ cell tracking**

575 Worm movement during long-term imaging acquisition was corrected using a custom-built MATLAB script.  
576 Briefly, sample drift in the z-direction was compensated for each time point assuming linear sample drift within  
577 the device channel. Image registration was initially performed on the channel outlining the germ cell membrane,  
578 with the derived transformation applied to all other channels. Sample shift in between time points was  
579 compensated by visually identifying the gonad's loop region and cropping the original image to a final size of  
580 750x250 pixels from the loop. For each time point, a maximum intensity z-projection of 5-10 slices was created.

581 Germ cell migration was tracked over 2 hours, manually identifying the position of individual germ cells in  
582 each projection. Germ cells were tracked using the SYN-4::GFP membrane marker alone for *let-60(ga89)(gf<sup>ts</sup>)*

583 or combined with the mCherry::H2B marker for the wild-type. Since germ cells migrate collectively, at least 10  
584 individual cells distributed over the distal gonad arm were tracked per worm, and eight worms per genotype were  
585 analyzed.

586

#### 587 **RNAi Interference**

588 RNAi plates were prepared by adding ampicillin (100 µg/ml) and IPTG (1 mM) to the NGM mixture. *E. coli*  
589 HT115 RNAi cultures were grown overnight at 37°C with shaking in LB medium supplemented with ampicillin  
590 (100 µg/ml) and tetracycline (10 µg/ml). Before plating the bacteria on the RNAi plates, the overnight liquid  
591 culture was diluted 1:1 with fresh LB (supplemented with ampicillin, tetracycline and IPTG) and bacteria were  
592 allowed to grow for 3-5 hours at 37°C with shaking (except for the *pmt-2* RNAi clone). 400 µl of bacterial culture  
593 were seeded on each plate, and plates were incubated at 37°C overnight. RNAi clones were obtained from either  
594 the Ahringer RNAi library or the ORFeome RNAi library (both from Source BioScience). All RNAi clones were  
595 sequenced before the experiments.

596

#### 597 **ERK-nKTR biosensor quantification**

598 MPK-1 activity in the VPCs was measured in mid-L2 larvae (1-cell-stage) using the ERK-nKTR biosensor  
599 described in de la Cova et al., 2017. Worms fed on OP50 were imaged 20-23 hours post L1 and worms fed on  
600 DA1877 were imaged 19-21 hours post L1. The developmental stage was determined by measuring gonad length  
601 (35-75 µm in mid-L2). Epifluorescence images were acquired with a 0.25 µm z-step, using a 63x oil objective  
602 described as above.

603 Image analysis was performed using a custom-built MATLAB script. Acquired images were flat-field  
604 corrected, after which the in-focus slice was identified using the mCherry::H2B nuclear signal. The images were  
605 then z-projected (sum intensity) around the in-focus slice (two slices above and below) and individual VPCs were  
606 identified. The red/green fluorescence intensity ratio was calculated for each VPC except P3.p, and normalized to  
607 the average intensity ratio of all VPCs for each animal.

608

#### 609 **Mitotic Index of germ cells**

610 The mitotic zone of dissected gonads was identified by HIM-3 antibody staining (see Gonad dissection and  
611 immunostaining for sample preparation). Mitotic cells were counted using Fiji software (Schindelin et al., 2012)  
612 based on nuclear DAPI staining. The number of pH3-positive M phase nuclei was divided by the total number of  
613 mitotic cells to calculate the mitotic index. Images were acquired using a confocal microscope with a 60x objective.

614

#### 615 **Sample preparation for LC-MS analysis**

616 Approximately 3000 worms were washed three times with ice-cold M9. M9 was then completely removed  
617 to obtain a pellet of adult worms, which was snap-frozen in liquid nitrogen and stored at -80°C until all three  
618 biological replicates had been collected. Sample preparation and mass spectrometry analysis were performed by  
619 the Functional Genomics Center Zurich (FGCZ). For tissue homogenization, *C. elegans* larvae were placed in test  
620 tubes with 1 ml precooled MCC (MeOH:CAN:Water 4:4:2) and one precooled 5 mm stainless steel bead.  
621 Homogenization and metabolite extraction were achieved by performing two rounds of 2.5 min of shaking at 30  
622 Hz (with precooled tubes and racks) using a TissueLyser (Qiagen). Homogenates were centrifuged for 10 min at

Laranjeira et al. 2023

623 10'000 rpm/4°C and metabolite extracts were recovered to clean test tubes. Protein concentration was measured  
624 in the extraction pellet and used for data normalization.

625 Before measurement, extracts were reconstituted in an injection buffer (90% acetonitrile). The solution was  
626 vortexed and centrifuged for 10 min at 12'000 rpm/4°C and 60 µl of the supernatant was transferred to a glass  
627 vial with a narrowed bottom (Total Recovery Vials, Waters) for LC-MS injection. In addition, method blanks, QC  
628 standards, and pooled samples were prepared in the same way to serve as quality control for the measurements.

629

### 630 **LC-MS analysis**

631 Metabolites were separated on a Thermo Vanquish Horizon Binary Pump equipped with a Waters Premier  
632 BEH Amide column (150mm x 2.1mm) by applying a gradient of 10 mM ammonium bicarbonate in water (A)  
633 and 10 mM ammonium bicarbonate in 95% acetonitrile (B) from 99% B to 30% B over 12 min. The injection  
634 volume was 3.5 µl. The flow rate was 0.4 µl/min with a column temperature of 40°C and autosampler temperature  
635 of 5°C. The LC was coupled to a Thermo Qexactive mass spectrometer by a HESI source. MS1 (molecular ion)  
636 and MS2 (fragment) data were acquired using negative polarization and Full MS / dd-MS<sup>2</sup> (Top5) over a mass  
637 range of 70 to 1050 m/z at MS1 and MS2 resolution of >17'500.

638

### 639 **Untargeted Metabolomics Data analysis**

640 Metabolomics data sets were evaluated in an untargeted fashion with the Compound Discoverer software  
641 (Thermo Scientific), which aligns the ion intensity maps and performs peak picking on an aggregated ion intensity  
642 map. Detected ions were identified based on accurate mass, MS2 data, detected adduct patterns and isotope  
643 patterns by comparing with entries in the online databases and in-house analyzed collection of standards (IROA  
644 MSMLS kit, IROA Technologies™). Quality controls were run on pooled samples and reference compound  
645 mixtures to determine technical accuracy and stability.

646

### 647 **mRNA isolation and sequencing**

648 For transcriptome analysis by RNAseq, animals were collected from plates seeded with either OP50 or  
649 DA1877 bacteria. For adults, approximately 500 animals (wild-type or *let-60(ga89)* (*gf<sup>ts</sup>*)) were collected. For  
650 larval analysis, 1500 animals (wild-type or *let-60(n1046<sup>gf</sup>)*) were collected. Before sample collection, adult worms  
651 were transferred to 25°C for 4 hours. Three biological replicates were used per condition. Animals were washed  
652 off plates with M9 and snap-frozen in liquid nitrogen. Samples were stored at -80°C until RNA extraction. Total  
653 mRNA extraction was performed for all samples at the same time with trizol, and samples were purified using a  
654 Rneasy Mini Kit (QIAGEN). Quality control (Agilent DNF-471 RNA kit), cDNA library preparation and whole  
655 exome sequencing (Illumina Novaseq 6000 system) were performed by the transcriptomics service of the  
656 Functional Genomics Center Zurich (FGCZ). Between 15 and 30 million reads were obtained per sample.  
657 Bioinformatic analysis was performed using an FGCZ in-house bioinformatics pipeline using the open-source  
658 tools STAR for read alignment and DESeq2 for differential gene expression.

659

### 660 **Western blot analysis**

661 One hundred worms were washed three times in ice-cold M9 and lysed in 50 µl 2x SDS PAGE buffer  
662 (containing 200 mM β-MCE) for 5 minutes at 95°C. Genomic DNA was digested by adding 2 µl of Rnase-free

Laranjeira et al. 2023

663 Dnase (QIAGEN) for 5 minutes at room temperature followed by a 5-minute incubation at 95°C. Samples were  
664 kept at 4°C overnight or -20°C for longer periods before loading. Before loading, samples were heated to 95°C,  
665 and 15 µl were loaded onto 4-12% gradient polyacrylamide gels.

666 For MAPK, histone H3 and histone H3 tri methyl K4 quantification, the membrane was treated with transfer  
667 buffer containing 20% methanol and blocked with 5% BSA for anti-MAPK and 5% milk for anti-histone blots.  
668 Samples were incubated with primary antibodies at 4°C overnight. Secondary antibodies (1:2000) HRP  
669 conjugated anti-rabbit or HRP conjugated anti-mouse were incubated for 2 hours at RT. The HRP was detected by  
670 incubating the membrane with a chemiluminescence assay for 4 minutes. For MAPK quantification, the  
671 membrane was then incubated with sodium azide (1:10) for 1 hour to inactivate the HRP-conjugates, and re-  
672 stained for alpha Tubulin (1:10'000), followed by incubation with HRP-conjugated secondary antibodies, as well  
673 as the chemiluminescence assay. The following primary antibodies were used: 1:2000 anti-dephosphorylated ERK  
674 1&2 Mouse; 1:10'000 anti-MAP Kinase Rabbit; 1:1000 anti-histone H3 rabbit and anti-histone H3 tri methyl K4.

675 Signal levels were quantified by measuring band intensities using a built-in tool in Fiji (Schindelin et al.,  
676 2012). For MAPK quantification, both total MAPK and phospho-MAPK were normalized to the tubulin loading  
677 control. Phospho-MAPK levels were then normalized by total MAPK levels.

678

#### 679 **Gonad dissection and immunostaining**

680 Gonad dissection was performed in PBS containing 0.2 mM tetramisole. Dissected gonads were transferred  
681 to siliconized 2 ml Eppendorf tubes and fixed in 4% formaldehyde for 10-60 minutes. For HIM-3 and pH3 staining,  
682 gonads were washed three times with PBS-T (0.05% Tween 20) and permeabilized with 0.5% Triton for 12  
683 minutes. All gonads were washed three times with 0.05% PBS-T and post-fixed for 5 minutes at -20°C in 100%  
684 methanol. Dissected gonads were blocked for 2-4 hours at room temperature in PGB buffer (PBS-T, 1% BSA,  
685 0.2% gelatin) or 1% BSA. Primary antibodies were diluted in PGB buffer and incubated overnight at 4°C, except  
686 for pH3 staining, which was incubated for 4 hours at room temperature after primary incubation with HIM-3  
687 overnight at 4°C. Secondary antibodies were incubated for 2 hours at room temperature. After secondary  
688 incubation, gonads were washed three times with PBS-T. To stain germ cell nuclei DAPI dihydrochloride was  
689 added (1:10'000) during the second wash for 10 minutes. Gonads were mounted in Mowiol on a glass slide and  
690 polymerized overnight at 4°C. Epifluorescence images were acquired using a 20x air objective as described above.

691 Before quantification, images were flat-field corrected using a custom-built MATLAB script. To correct for  
692 differences in gonad length, the length of the distal arm was normalized such that the distal tip cell (DTC)  
693 corresponded to 0 and the loop region to 1. Intensity profiles from the DTC to the loop were measured along each  
694 gonad in sum-intensity projections using Fiji (Schindelin et al., 2012).

695

696 **Table 1:** Antibodies used for immunostaining

| Antibody                            | Dilution |
|-------------------------------------|----------|
| Anti-dephosphorylated ERK 1&2 Mouse | 1:2000   |
| Anti-XND-1 Guinea-Pig               | 1:2000   |
| Anti-SUN-1 (pS8) Guinea-Pig         | 1:700    |
| Anti-GLD-1 Rabbit                   | 1:100    |
| Anti-HIM-3 Rabbit                   | 1:500    |
| Anti-phospho-histone H3 (Ser10)     | 1:400    |
| Anti-Rabbit Alexa 568 Donkey        | 1:1000   |
| Anti-Guinea Pig Alexa 594 Goat      | 1:1000   |
| Anti-mouse Alexa 488 Goat           | 1:1000   |

697

### 698 **Quantification of reporter gene expression**

699 LIN-1::GFP and LIN-39::GFP fluorescence intensity were scored in VPC descendants at the 2-cell Pnp.x  
700 stage (mid-L3). Wild-type worms fed with OP50 were imaged 29-30 hours post L1; wild-type worms fed with  
701 DA1877 were imaged 27-29 hours post L1; *let-60(n1046) (gf)* worms fed with OP50 were imaged 32-33 hours  
702 post-L1; and *let-60(n1046) (gf)* worms fed with DA1877 were imaged 29 hours post L1. Images were acquired  
703 on an epifluorescence microscope using a 63x oil-immersion lens, as described above. Before quantification,  
704 images were flat-field corrected using a custom-built MATLAB script. VPC nuclei were manually selected and  
705 the average fluorescence intensity was measured on an in-focus z-slice using built-in tools in Fiji (Schindelin et  
706 al., 2012). Fluorescence intensities for each pair of VPC descendants were averaged. The data for each VPC was  
707 normalized to the average value obtained from OP50-fed animals (i.e., P5.p on DA1877 or OP50 divided by the  
708 average of P5.p on OP50).

709

### 710 **Quantification of lipid droplet size**

711 Lipid droplet size was measured using the DHS-3::GFP reporter (Zhang et al., 2012). Twenty worms were  
712 analyzed per condition, and the area of 100 droplets was measured in the posterior section of the intestine of each  
713 worm. Images were acquired using a confocal microscope using a 100x oil-immersion lens as described above.  
714 Lipid droplet area was measured by manually selecting lipid droplets using Fiji (Schindelin et al., 2012).

715

### 716 **Generation of transgenic *C. elegans***

717 Somatic rescue of *metr-1* was achieved by creating extrachromosomal arrays in the *metr-1(lf)* background.  
718 Microinjections were performed according to Mello et al., 1991. Purified PCR DNA was injected at a  
719 concentration of 20 ng/μl. Two co-injection markers were used: 2.5 ng/μl of pCFJ90 (*Pmyo-2>mCherry*)  
720 (Frøkjær-Jensen et al., 2008) and 100 ng/μl of pBluescript-KS. Three independent lines were generated and  
721 characterized.

722

### 723 **Mammalian cell culture**

724 For cell culture experiments, we used the human lung carcinoma epithelial cell line A459, the epidermoid  
725 carcinoma A431 cell line and four mouse embryonic fibroblast (MEFs) lines obtained from the National Cancer



Laranjeira et al. 2023

726 Institute (NIH): KRAS 4B WT, KRAS 4B G12C, KRAS 4B G12V and BRAF V600E. All cell lines were tested  
727 for mycoplasma and kept at 5% CO<sub>2</sub>, 98% relative humidity and 37°C in a modified DMEM medium with high  
728 glucose and sodium pyruvate, containing 10% fetal bovine serum (FBS).

729 For methionine restriction (MR) experiments, cells were kept in a modified DMEM medium with high  
730 glucose. For methionine-positive conditions (no-MR), the medium was supplemented with 200 mM L-Glutamine,  
731 200 μM L-Methionine, 100 mM L-Cystine dihydrochloride, 400 μM DL-Homocysteine thiolactone hydrochloride  
732 and 100 mM sodium pyruvate. For methionine-restricted (MR) conditions, the medium was equally supplemented  
733 except for methionine.

734

### 735 **Cell migration assays**

736 G1-arrested A549 cells and MEFs were used for migration assays. Cells were seeded at 80'000 cells/ml  
737 density in DMEM medium with or without supplements. After 32 hours, cells were exposed to thymidine (1:50)  
738 to arrest the cell cycle as described in Haag et al., 2020 (first thymidine block). 16 hours after, the first thymidine  
739 block was released by replacing the medium. 8 hours after, cells were transferred to ibidi 2-well silicon culture  
740 inserts at a density of 400'000 cells/mL and again exposed to a medium containing thymidine (second thymidine  
741 block). Cells remained in the silicon culture inserts for 16 hours after which the inserts were removed and pictures  
742 were taken every hour for 8 hours. For experiments with MEK inhibitors, cells were exposed to 1 μM MEK162  
743 (binimetinib) and 1 μM LGX818 (ecorafenib) during the first thymidine block. The relative migration was  
744 calculated as  $R[\%] = (R_0 - R_n) / R_0 \times 100[\%]$ , where R<sub>0</sub> represents the initial open area and R<sub>n</sub> represents the  
745 remaining open area at each time point. Linear regression was used to determine migration rates shown in the bar  
746 graphs (**Figure 7A''**).

747

### 748 **EGF stimulation and immunostaining of A431 cells**

749 The A431 cell line was used to analyze filopodia formation upon EGF stimulation. Cells were exposed to  
750 no-methionine restriction (no-MR, 200 μM methionine + 400 μM homocysteine) or MR (0 μM methionine + 400  
751 μM homocysteine) 24 hours before the experiment. Cells were then seeded on glass slides in 24-well plates at  
752 114'000 cells/ml density in no-MR or MR conditions. After 24 hours, cells were serum starved and treated with  
753 1 μM MEK162 (binimetinib) and 1 μM LGX818 (ecorafenib). After another 16 hours, cells were stimulated with  
754 100 ng/ml of EGF for 10 minutes at 37°C (Haag et al., 2020), followed by 15 min fixation in 4% PFA at 37°C.  
755 Cells were permeabilized for 5 min with 0.2% Triton X-100 and 0.5% BSA and then blocked for 1 hour in 0.5%  
756 BSA and 0.2% gelatine. Fixed cells were stained with Phalloidin 568 for 40 minutes and 0.1 μg/ml DAPI for 5  
757 minutes. Glass slides were mounted with ProLong Gold Antifade Mountant (Thermo Scientific).

758

### 759 **Statistical analysis**

760 Statistical analysis was performed using GraphPad Prism 10. When comparing two samples, an unpaired t-  
761 test was used. For multiple samples, data was analyzed by one-way ANOVA followed by Dunnett's multiple  
762 comparison test for parametric data and a Kruskal-Wallis test for non-parametric data.

763

764 **Acknowledgments**

765 We would like to thank all present and past members of the Hajnal group for critical discussion and input on  
766 this project. A special thanks to Michael Daube for lab assistance and maintenance and to Dr. Michael Walser for  
767 support during the cell culture. We are thankful to the *Caenorhabditis* Genetics Center (CGC) (funded by the NIH  
768 P40 OD010440), to Wormbase (funded by NIH RO1 OD023041), Dr. Walhout and her lab for sending us the *C.*  
769 *aquosa* vitamin B12-mutants, and the National Cancer Institute (NIH) for the KRAS mutant and wild-type MEFs.  
770 We also want to thank Drs. Verena Jantsch, Judith Kimble and Monique Zetka for providing antibodies. We thank  
771 Dr. deMello and his lab for access to their facilities and reagents. Finally, a big thank you to the Functional  
772 Genomics Center Zurich (FGCZ) of the University of Zurich, especially Dr. Alaa Othman and Dr. Martina Zanella  
773 for helping us with the metabolomic analysis and Dr. Maria Domenica Moccia for help with the RNAseq. This  
774 project was supported by the Candoc Forschungskredit of the University of Zurich to A.C.L. (grant no. K-74406-  
775 03) and the Swiss National Science Foundation (grant no.31003A-184792) to A.H.

776

777

778 **Author contribution**

779 Conceptualization: A.C.L. and A.H.; Investigation: A.C.L., S.B., T.K. and A.H.; Formal Analysis: A.C.L., S.B.  
780 and N.R.G.; Writing – Original draft: A.C.L. and A.H.; Writing – Review and Editing: A.C.L. and A.H.; Funding  
781 acquisition: A.C.L. and A.H.

782

783 **References**

784 Anthony, M.L., Zhao, M., and Brindle, K.M. (1999). Inhibition of phosphatidylcholine biosynthesis  
785 following induction of apoptosis in HL-60 cells. *J. Biol. Chem.* *274*, 19686–19692.

786 Arur, S., Ohmachi, M., Berkseth, M., Nayak, S., Hansen, D., Zarkower, D., and Schedl, T. (2011). MPK-1  
787 ERK controls membrane organization in *C. elegans* oogenesis via a sex-determination module. *Dev. Cell* *20*, 677–  
788 688.

789 Beitel, G.J., Clark, S.G., and Horvitz, H.R. (1990). *Caenorhabditis elegans* ras gene *let-60* acts as a switch  
790 in the pathway of vulval induction. *Nature* *348*, 503–509.

791 Berger, S., Lattmann, E., Aegerter-Wilmsen, T., Hengartner, M., Hajnal, A., Demello, A., and Casadevall I  
792 Solvas, X. (2018). Long-term: *C. elegans* immobilization enables high-resolution developmental studies in vivo.  
793 *Lab Chip* *18*, 1359–1368.

794 Bito, T., and Watanabe, F. (2016). Biochemistry, function, and deficiency of vitamin B12 in *Caenorhabditis*  
795 *elegans*. *Exp. Biol. Med.* *241*, 1663–1668.

796 Booher, K., Lin, D.-W., Borrego, S.L., and Kaiser, P. (2012). Downregulation of Cdc6 and pre-replication  
797 complexes in response to methionine stress in breast cancer cells. *Cell Cycle* *11*, 4414–4423.

798 Bose, S., Allen, A.E., and Locasale, J.W. (2020). The Molecular Link from Diet to Cancer Cell Metabolism.  
799 *Mol. Cell* *78*, 1034–1044.

800 Brendza, K.M., Haakenson, W., Cahoon, R.E., Hicks, L.M., Palavalli, L.H., Chiapelli, B.J., McLaird, M.,  
801 McCarter, J.P., Williams, D.J., Hresko, M.C., et al. (2007). Phosphoethanolamine N-methyltransferase (PMT-1)  
802 catalyses the first reaction of a new pathway for phosphocholine biosynthesis in *Caenorhabditis elegans*. *Biochem.*

- 803 J. *404*, 439–448.
- 804 Brenner, S. (1974). The genetics of *Caenorhabditis elegans*. *Genetics* *77*, 71–94.
- 805 Brock, T.J., Browse, J., and Watts, J.L. (2007). Fatty acid desaturation and the regulation of adiposity in  
806 *Caenorhabditis elegans*. *Genetics* *176*, 865–875.
- 807 Cavuoto, P., and Fenech, M.F. (2012). A review of methionine dependency and the role of methionine  
808 restriction in cancer growth control and life-span extension. *Cancer Treat. Rev.* *38*, 726–736.
- 809 Cha, D.S., Datla, U.S., Hollis, S.E., Kimble, J., and Lee, M.H. (2012). The Ras-ERK MAPK regulatory  
810 network controls dedifferentiation in *Caenorhabditis elegans* germline. *Biochim. Biophys. Acta - Mol. Cell Res.*  
811 *1823*, 1847–1855.
- 812 Chaudhari, S.N., Mukherjee, M., Vagasi, A.S., Bi, G., Rahman, M.M., Nguyen, C.Q., Paul, L., Selhub, J.,  
813 and Kipreos, E.T. (2016). Bacterial Foliates Provide an Exogenous Signal for *C. elegans* Germline Stem Cell  
814 Proliferation. *Dev. Cell* *38*, 33–46.
- 815 Chello, P.L., and Bertino, J.R. (1973). Dependence of 5-Methyltetrahydrofolate Utilization by L5178Y  
816 Murine Leukemia Cells in Vitro on the Presence of Hydroxycobalamin and Transcobalamin II. *Cancer Res.* *33*,  
817 1989–1904.
- 818 Chi, C., Ronai, D., Than, M.T., Walker, C.J., Sewell, A.K., and Han, M. (2016). Nucleotide levels regulate  
819 germline proliferation through modulating GLP-1/Notch signaling in *C. elegans*. *Genes Dev.* *30*, 307–320.
- 820 Church, D.L., Guan, K.L., and Lambie, E.J. (1995). Three genes of the MAP kinase cascade, *mek-2*, *mpk-*  
821 *1/sur-1* and *let-60 ras*, are required for meiotic cell cycle progression in *Caenorhabditis elegans*. *Development* *121*,  
822 2525–2535.
- 823 Crook, M., Upadhyay, A., Ido, L.J., and Hanna-Rose, W. (2016). Epidermal growth factor receptor cell  
824 survival signaling requires phosphatidylcholine biosynthesis. *G3 Genes, Genomes, Genet.* *6*, 3533–3540.
- 825 Cui, Z., and Houweling, M. (2002). Phosphatidylcholine and cell death. *Biochim. Biophys. Acta - Mol. Cell*  
826 *Biol. Lipids* *1585*, 87–96.
- 827 Dai, Y., Tang, H., and Pang, S. (2021). The Crucial Roles of Phospholipids in Aging and Lifespan Regulation.  
828 *Front. Physiol.* *12*, 1–7.
- 829 Dai, Z., Mentch, S.J., Gao, X., Nichenametla, S.N., and Locasale, J.W. (2018). Methionine metabolism  
830 influences genomic architecture and gene expression through H3K4me3 peak width. *Nat. Commun.* *2018* *91* *9*,  
831 1–12.
- 832 Das, D., Chen, S.Y., and Arur, S. (2020). ERK phosphorylates chromosomal axis component HORMA  
833 domain protein HTP-1 to regulate oocyte numbers. *Sci. Adv.* *6*.
- 834 Dave, J., Beitel, G.J., Scott, G.C., Horvitz, H.R., and Kornfeld, K. (1998). Gain-of-function mutations in the  
835 *Caenorhabditis elegans* *lin-1* ETS gene identify a c-terminal regulatory domain phosphorylated by ERK MAP  
836 Kinase. *Nature* *388*, 539–547.
- 837 Deline, M.L., Vrablik, T.L., and Watts, J.L. (2013). Dietary supplementation of polyunsaturated fatty acids  
838 in *Caenorhabditis elegans*. *J. Vis. Exp.* 1–7.
- 839 Deminice, R., de Castro, G.S.F., Francisco, L.V., da Silva, L.E.C.M., Cardoso, J.F.R., Frajacomo, F.T.T.,  
840 Teodoro, B.G., dos Reis Silveira, L., and Jordao, A.A. (2015). Creatine supplementation prevents fatty liver in  
841 rats fed choline-deficient diet: A burden of one-carbon and fatty acid metabolism. *J. Nutr. Biochem.* *26*, 391–397.
- 842 Deng, X., Yin, X., Allan, R., Lu, D.D., Maurer, C.W., Haimovitz-Friedman, A., Fuks, Z., Shaham, S., and

- 843 Kolesnick, R. (2008). Ceramide biogenesis is required for radiation-induced apoptosis in the germ line of *C.*  
844 *elegans*. *Science* (80-. ). 322, 110–115.
- 845 Derry, W.B., Putzke, A.P., and Rothman, J.H. (2001). *Caenorhabditis elegans* p53: Role in apoptosis,  
846 meiosis, and stress resistance. *Science* (80-. ). 294, 591–595.
- 847 Ding, W., Smulan, L.J., Hou, N.S., Taubert, S., Watts, J.L., and Walker, A.K. (2015). S-adenosylmethionine  
848 levels govern innate immunity through distinct methylation-dependent pathways. *Cell Metab.* 22, 633–645.
- 849 Ding, W., Higgins, D.P., Yadav, D.K., Godbole, A.A., Pukkila-Worley, R., and Walker, A.K. (2018). Stress-  
850 responsive and metabolic gene regulation are altered in low S-adenosylmethionine. *PLoS Genet.* 14, 1–26.
- 851 Diot, C., García-González, A.P., Vieira, A.F., Walker, M., Honeywell, M., Doyle, H., Ponomarova, O.,  
852 Rivera, Y., Na, H., Zhang, H., et al. (2022). Bacterial diet modulates tamoxifen-induced death via host fatty acid  
853 metabolism. *Nat. Commun.* 13.
- 854 Drosten, M., Dhawahir, A., Sum, E.Y.M., Urosevic, J., Lechuga, C.G., Esteban, L.M., Castellano, E., Guerra,  
855 C., Santos, E., and Barbacid, M. (2010). Genetic analysis of Ras signalling pathways in cell proliferation,  
856 migration and survival. *EMBO J.* 29, 1091–1104.
- 857 Ducker, G.S., and Rabinowitz, J.D. (2017). One-Carbon Metabolism in Health and Disease. *Cell Metab.* 25,  
858 27–42.
- 859 Eisenmann, D.M., and Kim, S.K. (1997). Mechanism of Activation of the *Caenorhabditis elegans* *rm*  
860 Homologue *let-60* by a Novel, Temperature-Sensitive, Gain-of-Function Mutation. *Genetics* 565, 553–565.
- 861 Fergin, A., Boesch, G., Greter, N.R., Berger, S., and Hajnal, A. (2022). Tissue-specific inhibition of protein  
862 sumoylation uncovers diverse SUMO functions during *C. elegans* vulval development. *PLoS Genet.* 18, 1–22.
- 863 Fisher, K., Southall, S.M., Wilson, J.R., and Poulin, G.B. (2010). Methylation and demethylation activities  
864 of a *C. elegans* MLL-like complex attenuate RAS signalling. *Dev. Biol.* 341, 142–153.
- 865 Froese, D.S., Fowler, B., and Baumgartner, M.R. (2019). Vitamin B12, folate, and the methionine  
866 remethylation cycle—biochemistry, pathways, and regulation. *J. Inherit. Metab. Dis.* 42, 673–685.
- 867 Frøkjær-Jensen, C., Davis, M.W., Hopkins, C.E., Newman, B., Thummel, J.M., Olesen, S.-P., Grunnet, M.,  
868 and Jørgensen, E.M. (2008). Single copy insertion of transgenes in *C. elegans*. *Nat. Genet.* 40.
- 869 Gartner, A., Milstein, S., Ahmed, S., Hodgkin, J., and Hengartner, M.O. (2000). A Conserved Checkpoint  
870 Pathway Mediates DNA Damage–Induced Apoptosis and Cell Cycle Arrest in *C. elegans*. *Mol. Cell* 5, 435–443.
- 871 Giese, G.E., Walker, M.D., Ponomarova, O., Zhang, H., Li, X., Minevich, G., and Walkout, A.J.M. (2020).  
872 *Caenorhabditis elegans* methionine / S- adenosylmethionine cycle activity is sensed and adjusted by a nuclear  
873 hormone receptor. *Elife* 1–25.
- 874 Glunde, K., Bhujwala, Z.M., and Ronen, S.M. (2011). Choline metabolism in malignant transformation.  
875 *Nat. Rev. Cancer* 11, 835–848.
- 876 Godbole, A.A., Gopalan, S., Nguyen, T.K., Munden, A.L., Lui, D.S., Fanelli, M.J., Vo, P., Lewis, C.A.,  
877 Spinelli, J.B., Fazio, T.G., et al. (2023). S-adenosylmethionine synthases specify distinct H3K4me3 populations  
878 and gene expression patterns during heat stress. *Elife* 12, 1–26.
- 879 Goudeau, J., Bellemin, S., Toselli-Mollereau, E., Shamalnasab, M., Chen, Y., and Aguilaniu, H. (2011).  
880 Fatty acid desaturation links germ cell loss to longevity through NHR-80/HNF4 in *C. elegans*. *PLoS Biol.* 9.
- 881 Green, R., Allen, L.H., Bjørke-Monsen, A.L., Brito, A., Guéant, J.L., Miller, J.W., Molloy, A.M., Nexø, E.,  
882 Stabler, S., Toh, B.H., et al. (2017). Vitamin B12 deficiency. *Nat. Rev. Dis. Prim.* 3.

Laranjeira et al. 2023

- 883 Greenwald, I. (1997). Development of the Vulva. *C. Elegans II*.
- 884 Greer, E.L., Maures, T.J., Hauswirth, A.G., Green, E.M., Leeman, D.S., Maro, G.S., Han, S., Banko, M.R.,  
885 Gozani, O., and Brunet, A. (2010). Members of the H3K4 trimethylation complex regulate lifespan in a germline-  
886 dependent manner in *C. elegans*. *Nature* *466*, 383–387.
- 887 Gumienny, T.L., Lambie, E., Hartwig, E., Horvitz, H.R., and Hengartner, M.O. (1999). Genetic control of  
888 programmed cell death in the *Caenorhabditis elegans* hermaphrodite germline. *1022*, 1011–1022.
- 889 Guo, Y., Pan, W., Liu, S., Shen, Z., Xu, Y., and Hu, L. (2020). ERK/MAPK signalling pathway and  
890 tumorigenesis (Review). *Exp. Ther. Med.* 1997–2007.
- 891 Gupta, B.P., Hanna-Rose, W., and Sternberg, P.W. (2012). Morphogenesis of the vulva and the vulval-  
892 uterine connection\*. *Wormbook*.
- 893 Haag, A., Walser, M., Henggeler, A., and Hajnal, A. (2020). The CHORD protein CHP-1 regulates EGF  
894 receptor trafficking and signaling in *C. elegans* and in human cells. *Elife* *9*, 1–23.
- 895 Han, M., Aroian, R. V., and Sternberg, P.W. (1990). The *let-60* Locus Controls the Switch Between Vulval  
896 and Nonvulval Cell Fates in *Caenorhabditis elegans*.
- 897 Hanahan, D., and Weinberg, R.A. (2011). Hallmarks of cancer: The next generation. *Cell* *144*, 646–674.
- 898 Hidalgo, M.A., Nahuelpan, C., Manosalva, C., Jara, E., Carretta, M.D., Conejeros, I., Loaiza, A., Chihuailaf,  
899 R., and Burgos, R.A. (2011). Oleic acid induces intracellular calcium mobilization, MAPK phosphorylation,  
900 superoxide production and granule release in bovine neutrophils. *Biochem. Biophys. Res. Commun.* *409*, 280–  
901 286.
- 902 Huelgas-Morales, G., and Greenstein, D. (2018). Control of oocyte meiotic maturation in *C. elegans*. *Semin.*  
903 *Cell Dev. Biol.* *84*, 90–99.
- 904 Kaiser, P. (2020). Methionine dependence of cancer. *Biomolecules* *10*, 7–9.
- 905 Kera, Y., Katoh, Y., Ohta, M., Matsumoto, M., Takano-Yamamoto, T., and Igarashi, K. (2013). Methionine  
906 adenosyltransferase II-dependent histone H3K9 methylation at the *COX-2* gene locus. *J. Biol. Chem.* *288*, 13592–  
907 13601.
- 908 Kohlbrenner, T., Berger, S., Aegerter-Wilmsen, T., Laranjeira, A.C., DeMello, A., and Hajnal, A. (2023).  
909 Actomyosin-mediated apical constriction promotes physiological germ cell death in *C. elegans*.
- 910 Krueger, J.S., Keshamouni, V.G., Atanaskova, N., and Reddy, K.B. (2001). Temporal and quantitative  
911 regulation of mitogen-activated protein kinase (MAPK) modulates cell motility and invasion. *Oncogene* *20*, 4209–  
912 4218.
- 913 de la Cova, C., Townley, R., Regot, S., and Greenwald, I. (2017). A Real-Time Biosensor for ERK Activity  
914 Reveals Signaling Dynamics during *C. elegans* Cell Fate Specification. *Dev. Cell* *42*, 542-553.e4.
- 915 Lackner, M.R., and Kim, S.K. (1998). Genetic analysis of the *Caenorhabditis elegans* MAP kinase gene  
916 *mpk-1*. *Genetics* *150*, 103–117.
- 917 Lee, H.S., Nam, Y., Chung, Y.H., Kim, H.R., Park, E.S., Chung, S.J., Kim, J.H., Sohn, U.D., Kim, H.C., Oh,  
918 K.W., et al. (2014). Beneficial effects of phosphatidylcholine on high-fat diet-induced obesity, hyperlipidemia  
919 and fatty liver in mice. *Life Sci.* *118*, 7–14.
- 920 Lee, M.H., Ohmachi, M., Arur, S., Nayak, S., Francis, R., Church, D., Lambie, E., and Schedl, T. (2007).  
921 Multiple functions and dynamic activation of MPK-1 extracellular signal-regulated kinase signaling in  
922 *Caenorhabditis elegans* germline development. *Genetics* *177*, 2039–2062.

Laranjeira et al. 2023

- 923 Lemieux, G.A., and Ashrafi, K. (2016). Investigating Connections between Metabolism, Longevity, and  
924 Behavior in *Caenorhabditis elegans*. *Trends Endocrinol. Metab.* *27*, 586–596.
- 925 Li, T., and Kelly, W.G. (2011). A role for Set1/MLL-related components in epigenetic regulation of the  
926 *Caenorhabditis elegans* germ line. *PLoS Genet.* *7*.
- 927 Li, S., Swanson, S.K., Gogol, M., Florens, L., Washburn, M.P., Workman, J.L., and Suganuma, T. (2015).  
928 Serine and SAM Responsive Complex SESAME Regulates Histone Modification Crosstalk by Sensing Cellular  
929 Metabolism. *Mol. Cell* *60*, 408–421.
- 930 Li, Y., Na, K., Lee, H.J., Lee, E.Y., and Paik, Y.K. (2011). Contribution of *sams-1* and *pmt-1* to lipid  
931 homeostasis in adult *Caenorhabditis elegans*. *J. Biochem.* *149*, 529–538.
- 932 Liu, F., Yang, X., Geng, M., and Huang, M. (2018). Targeting ERK, an Achilles' Heel of the MAPK pathway,  
933 in cancer therapy. *Acta Pharm. Sin. B* *8*, 552–562.
- 934 Lochnit, G., and Geyer, R. (2003). Evidence for the presence of the Kennedy and Bremer-Greenberg  
935 pathways in *Caenorhabditis elegans*. *Acta Biochim. Pol.* *50*, 1239–1243.
- 936 MacNeil, L.T., Watson, E., Arda, H.E., Zhu, L.J., and Walhout, A.J.M. (2013). Diet-induced developmental  
937 acceleration independent of TOR and insulin in *C. elegans*. *Cell* *153*, 240–252.
- 938 Mello1, C.C., Kramer2', J.M., Stinchcomb4, D., and Ambros, V. (1991). Efficient gene transfer in *C. elegans*:  
939 extrachromosomal maintenance and integration of transforming sequences. *EMBO J.* *10*, 3959–3970.
- 940 Mentch, S.J., Mehrmohamadi, M., Huang, L., Liu, X., Gupta, D., Mattocks, D., Gómez Padilla, P., Ables,  
941 G., Bamman, M.M., Thalacker-Mercer, A.E., et al. (2015). Histone Methylation Dynamics and Gene Regulation  
942 Occur through the Sensing of One-Carbon Metabolism. *Cell Metab.* *22*, 861–873.
- 943 Newman, A.C., and Maddocks, O.D.K. (2017). One-carbon metabolism in cancer. *Br. J. Cancer* *116*, 1499–  
944 1504.
- 945 Niculescu, M.D., Craciunescu, C.N., and Zeisel, S.H. (2006). Dietary choline deficiency alters global and  
946 gene-specific DNA methylation in the developing hippocampus of mouse fetal brains. *FASEB J. • Res. Commun.*
- 947 Özdemir, I., and Steiner, F.A. (2022). Transmission of chromatin states across generations in *C. elegans*.  
948 *Semin. Cell Dev. Biol.* *127*, 133–141.
- 949 Pazdernik, N., and Sched, T. (2013). Introduction to Germ Cell Development in *C. elegans*. *Adv. Exp. Med.*  
950 *Biol.* *757*, 249–276.
- 951 Perez, M.A., and Watts, J.L. (2021). Worms, fat, and death: *Caenorhabditis elegans* lipid metabolites  
952 regulate cell death. *Metabolites* *11*, 1–18.
- 953 Perez, M.A., Magtanong, L., Dixon, S.J., and Watts, J.L. (2020). Dietary Lipids Induce Ferroptosis in  
954 *Caenorhabditiselegans* and Human Cancer Cells. *Dev. Cell* *54*, 447-454.e4.
- 955 Qin, S., Wang, Y., Li, L., Liu, J., Xiao, C., Duan, D., Hao, W., Qin, C., Chen, J., Yao, L., et al. (2022). Early-  
956 life vitamin B12 orchestrates lipid peroxidation to ensure reproductive success via SBP-1/SREBP1 in  
957 *Caenorhabditis elegans*. *Cell Rep.* *40*, 111381.
- 958 Robinson-Thiewes, S., Dufour, B., Martel, P.O., Lechasseur, X., Brou, A.A.D., Roy, V., Chen, Y., Kimble,  
959 J., and Narbonne, P. (2021). Non-autonomous regulation of germline stem cell proliferation by somatic MPK-  
960 1/MAPK activity in *C. elegans*. *Cell Rep.* *35*, 109162.
- 961 Saito, R. de F., Andrade, L.N. de S., Bustos, S.O., and Chammas, R. (2022). Phosphatidylcholine-Derived  
962 Lipid Mediators: The Crosstalk Between Cancer Cells and Immune Cells. *Front. Immunol.* *13*, 1–24.



Laranjeira et al. 2023

- 963 Santa-María, C., López-Enríquez, S., Montserrat-de la Paz, S., Geniz, I., Reyes-Quiroz, M.E., Moreno, M.,  
964 Palomares, F., Sobrino, F., and Alba, G. (2023). Update on Anti-Inflammatory Molecular Mechanisms Induced  
965 by Oleic Acid. *Nutrients* *15*, 1–16.
- 966 Schindelin, J., Arganda-Carreras, I., Frise, E., Kaynig, V., Longair, M., Pietzsch, T., Preibisch, S., Rueden,  
967 C., Saalfeld, S., Schmid, B., et al. (2012). Fiji: An open-source platform for biological-image analysis. *Nat.*  
968 *Methods* *9*, 676–682.
- 969 Schindler, A.J., and Sherwood, D.R. (2013). Morphogenesis of the *Caenorhabditis elegans* vulva. *Wiley*  
970 *Interdiscip. Rev. Dev. Biol.* *2*, 75–95.
- 971 Schmid, T., Snoek, L.B., Fröhli, E., van der Bent, M.L., Kammenga, J., and Hajnal, A. (2015). Systemic  
972 Regulation of RAS/MAPK Signaling by the Serotonin Metabolite 5-HIAA. *PLoS Genet.* *11*, 1–16.
- 973 Schubbert, S., Shannon, K., and Bollag, G. (2007). Hyperactive Ras in developmental disorders and cancer.  
974 *Nat. Rev. Cancer* *7*, 295–308.
- 975 Serefidou, M., Venkatasubramani, A.V., and Imhof, A. (2019). The Impact of One Carbon Metabolism on  
976 Histone Methylation. *Front. Genet.* *10*, 1–7.
- 977 Shaham, S., and Horvitz, H.R. (1996). Developing *Caenorhabditis elegans* neurons may contain both cell-  
978 death protective and killer activities. *Genes Dev.* *10*, 578–591.
- 979 Shyh-Chang, N., Locasale, J.W., Lyssiotis, C.A., Zheng, Y., Teo, R.Y., Ratanasirintra-woot, S., Zhang, J.,  
980 Onder, T., Unternaehrer, J.J., Zhu, H., et al. (2013). Influence of threonine metabolism on S-adenosylmethionine  
981 and histone methylation. *Science* (80-. ). *339*, 222–226.
- 982 Spiri, S., Berger, S., Mereu, L., DeMello, A., and Hajnal, A. (2022). Reciprocal EGFR signaling in the  
983 anchor cell ensures precise inter-organ connection during *Caenorhabditis elegans* vulval morphogenesis.  
984 *Development* *149*.
- 985 Sternberg, P.W., and Han, M. (1998). Genetics of RAS signaling in *C. elegans*. *Trends Genet.* *9525*, 466–  
986 472.
- 987 Sternberg, P.W., and Horvitz, H.R. (1986). Pattern formation during vulval development in *C. elegans*. *Cell*  
988 *44*, 761–772.
- 989 Sugimura, T., Birnbaum, S.M., Winitz, M., and Greenstein, J.P. (1959). Quantitative nutritional studies with  
990 water-soluble, chemically defined diets. VIII. The forced feeding of diets each lacking in one essential amino acid.  
991 *Arch. Biochem. Biophys.* *81*, 448–455.
- 992 Sundaram, M. V (2013). Canonical RTK-Ras-ERK signaling and related alternative pathways \*. *Wormbook*.
- 993 Van de Vijver, M.J., Kumar, R., and Mendelsohn, J. (1991). Ligand-induced activation of A431 cell  
994 epidermal growth factor receptors occurs primarily by an autocrine pathway that acts upon receptors on the surface  
995 rather than intracellularly. *J. Biol. Chem.* *266*, 7503–7508.
- 996 Walker, A.K., Boag, P.R., and Blackwell, T.K. (2007). Transcription reactivation steps stimulated by oocyte  
997 maturation in *C. elegans*. *Dev. Biol.* *304*, 382–393.
- 998 Walker, A.K., Jacobs, R.L., Watts, J.L., Rottiers, V., Jiang, K., Finnegan, D.M., Shioda, T., Hansen, M.,  
999 Yang, F., Niebergall, L.J., et al. (2011). A conserved SREBP-1/phosphatidylcholine feedback circuit regulates  
1000 lipogenesis in metazoans. *Cell* *147*, 840–852.
- 1001 Wan, Q.L., Meng, X., Fu, X., Chen, B., Yang, J., Yang, H., and Zhou, Q. (2019). Intermediate metabolites  
1002 of the pyrimidine metabolism pathway extend the lifespan of *C. elegans* through regulating reproductive signals.

Laranjeira et al. 2023

- 1003 Aging (Albany, NY). *11*, 3993–4010.
- 1004 Wan, Q.L., Meng, X., Wang, C., Dai, W., Luo, Z., Yin, Z., Ju, Z., Fu, X., Yang, J., Ye, Q., et al. (2022).  
1005 Histone H3K4me3 modification is a transgenerational epigenetic signal for lipid metabolism in *Caenorhabditis*  
1006 *elegans*. *Nat. Commun.* *13*, 1–14.
- 1007 Wang, X., and Yang, C. (2016). Programmed cell death and clearance of cell corpses in *Caenorhabditis*  
1008 *elegans*. *Cell. Mol. Life Sci.* *73*, 2221–2236.
- 1009 Wasmuth, J., Schmid, R., Hedley, A., and Blaxter, M. (2008). On the extent and origins of genic novelty in  
1010 the phylum nematoda. *PLoS Negl. Trop. Dis.* *2*.
- 1011 Watson, E., MacNeil, L.T., Arda, H.E., Zhu, L.J., and Walhout, A.J.M. (2013). Integration of metabolic and  
1012 gene regulatory networks modulates the *C. elegans* dietary response. *Cell* *153*, 253–266.
- 1013 Watson, E., Macneil, L.T., Ritter, A.D., Yilmaz, L.S., Rosebrock, A.P., and Caudy, A.A. (2014). Interspecies  
1014 Systems Biology Uncovers Metabolites Affecting *C. elegans* Gene Expression and Life History Traits. *Cell* *156*,  
1015 759–770.
- 1016 Watson, E., Olin-Sandoval, V., Louisse, T., Walhout, A.J., Troyanskaya, O.G., Li, C.-H., Watson, E.,  
1017 Holdorf, A.D., Yao, V., Ralser, M., et al. (2016). Metabolic network rewiring of propionate flux compensates  
1018 vitamin B12 deficiency in *C. elegans*. *Elife* *5*, 1–21.
- 1019 Watts, J.L. (2009). Fat synthesis and adiposity regulation in *Caenorhabditis elegans*. *Trends Endocrinol.*  
1020 *Metab.* *20*, 58–65.
- 1021 Watts, J.L., and Ristow, M. (2017). Lipid and carbohydrate metabolism in *Caenorhabditis elegans*. *Genetics*  
1022 *207*, 413–446.
- 1023 Xiao, Y., Bedet, C., Robert, V.J.P., Simonet, T., Dunkelbarger, S., Rakotomalala, C., Soete, G., Korswagen,  
1024 H.C., Strome, S., and Palladino, F. (2011). *Caenorhabditis elegans* chromatin-associated proteins SET-2 and ASH-  
1025 2 are differentially required for histone H3 Lys 4 methylation in embryos and adult germ cells. *Proc. Natl. Acad.*  
1026 *Sci. U. S. A.* *108*, 8305–8310.
- 1027 Yamasaki, M., Tachibana, H., Yamada, A., Ochi, Y., Madhyastha, H., Nishiyama, K., and Yamada, K.  
1028 (2008). Oleic acid prevents apoptotic cell death induced by trans10, cis12 isomer of conjugated linoleic acid via  
1029 p38 MAP kinase dependent pathway. *Vitr. Cell. Dev. Biol. - Anim.* *44*, 290–294.
- 1030 Yang, Y., Xu, G., Xu, Y., Cheng, X., Xu, S., Chen, S., and Wu, L. (2021). Ceramide mediates radiation-  
1031 induced germ cell apoptosis via regulating mitochondria function and MAPK factors in *Caenorhabditis elegans*.  
1032 *Ecotoxicol. Environ. Saf.* *208*, 111579.
- 1033 Ye, C., Sutter, B.M., Wang, Y., Kuang, Z., and Tu, B.P. (2017). A Metabolic Function for Phospholipid and  
1034 Histone Methylation. *Mol. Cell* *66*, 180-193.e8.
- 1035 Yuan, Z., Feng, L., Jiang, W., Wu, P., Liu, Y., Kuang, S., Tang, L., and Zhou, X. (2021). Dietary choline  
1036 deficiency aggravated the intestinal apoptosis in association with the MAPK signalling pathways of juvenile grass  
1037 carp (*Ctenopharyngodon idella*). *Aquaculture* *532*, 736046.
- 1038 Zeisel, S.H. (2011). The supply of choline is important for fetal progenitor cells. *Semin. Cell Dev. Biol.* *22*,  
1039 624–628.
- 1040 Zhang, B., Zeng, M., Wang, Y., Li, M., Wu, Y., Xu, R., Zhang, Q., Jia, J., Huang, Y., Zheng, X., et al. (2022).  
1041 Oleic acid alleviates LPS-induced acute kidney injury by restraining inflammation and oxidative stress via the  
1042 Ras/MAPKs/PPAR- $\gamma$  signaling pathway. *Phytomedicine* *94*, 153818.

Laranjeira et al. 2023

- 1043 Zhang, P., Na, H., Liu, Z., Zhang, S., Xue, P., Chen, Y., Pu, J., Peng, G., Huang, X., Yang, F., et al. (2012).  
1044 Proteomic study and marker protein identification of *Caenorhabditis elegans* lipid droplets. *Mol. Cell. Proteomics*  
1045 *11*, 317–328.
- 1046 Zhou, Z., Hartwig, E., and Horvitz, H.R. (2001). CED-1 is a transmembrane receptor that mediates cell  
1047 corpse engulfment in *C. elegans*. *Cell* *104*, 43–56.
- 1048 Zhu, X., Liu, Y., Zhang, H., and Liu, P. (2018). Whole-genome RNAi screen identifies methylation-related  
1049 genes influencing lipid metabolism in *Caenorhabditis elegans*. *J. Genet. Genomics* *45*, 259–272.  
1050

1051 **Figures and Figures Legends**

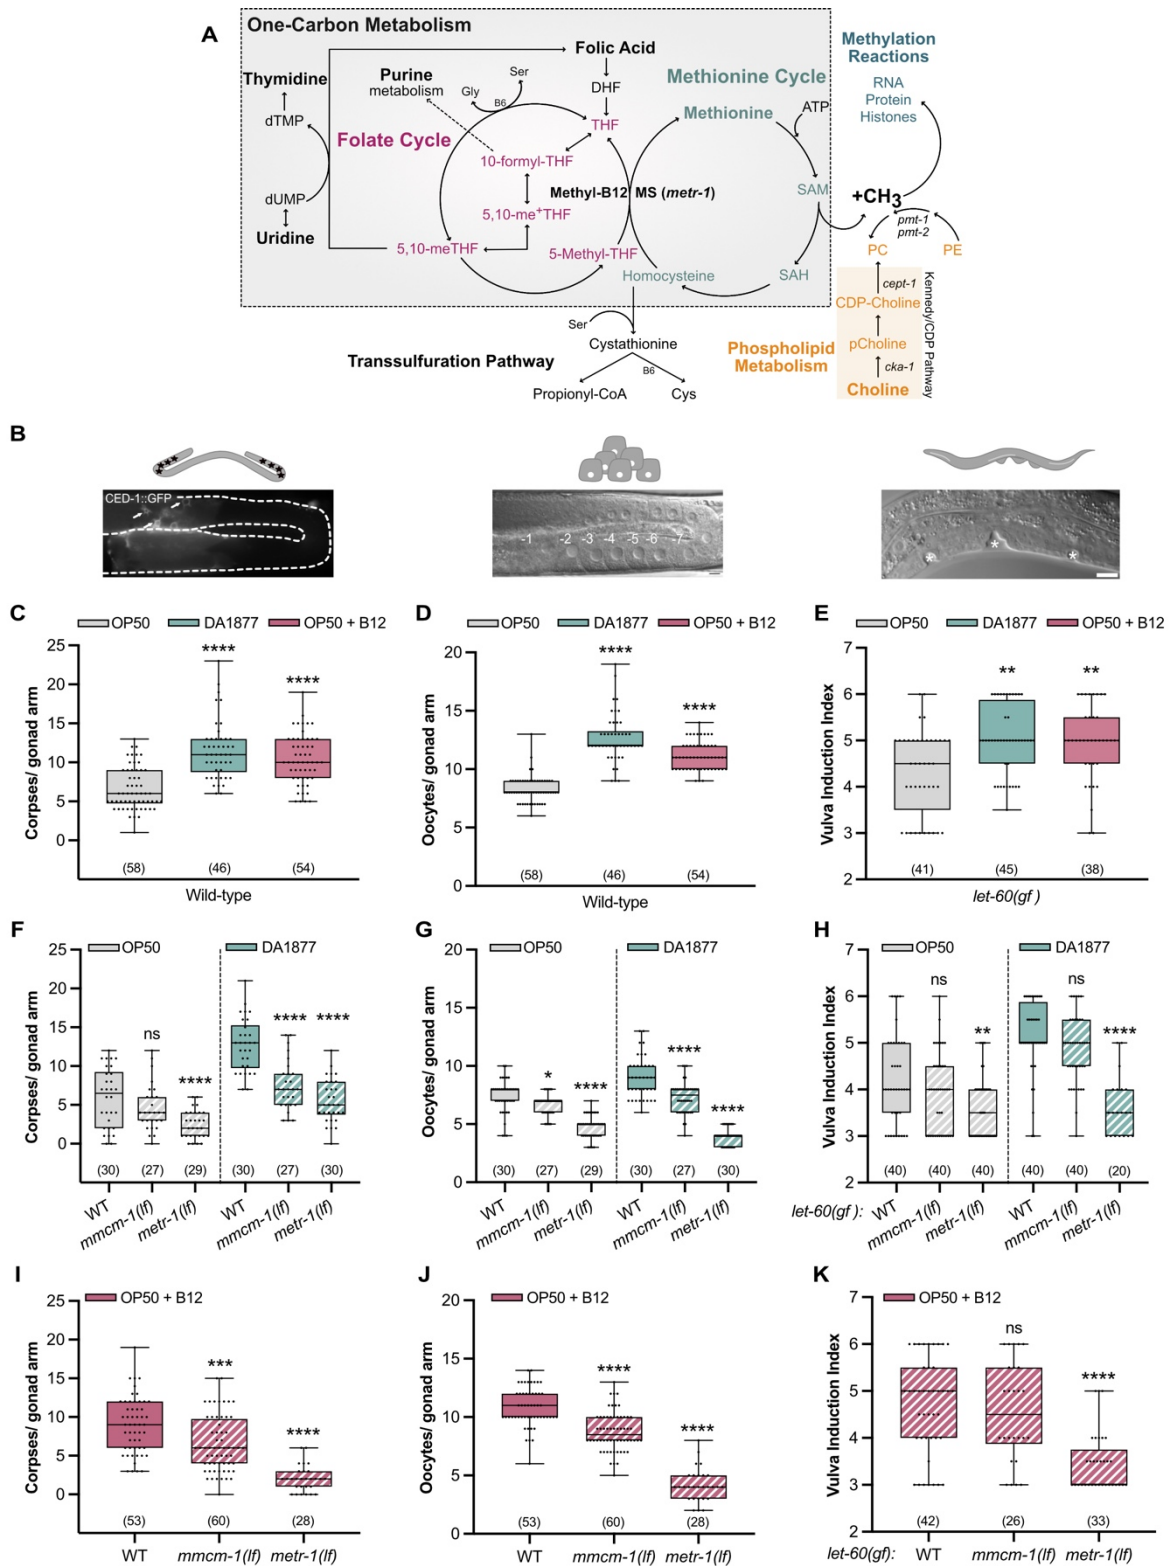

1052

1053

1054 **Figure 1. The DA1877 diet promotes VPC and germ cell differentiation through the vitamin B12**  
1055 **metabolism.**

1056 (A) Schematic representation of the one-carbon metabolism. (B) Illustrations of the observed phenotypes: germ  
1057 cell apoptosis (corpses), oocyte differentiation or vulval induction; scale bar: 10  $\mu\text{m}$ . (C-D) Number of corpses  
1058 (C) or oocytes (D) in wild-type animals. (E) Vulval induction index of *let-60(gf)* animals. (C-E) Animals were fed  
1059 with OP50 (gray), DA1877 (blue) or OP50 supplemented with 64 nM B12 (pink). (F-H) Number of corpses (F),  
1060 oocytes (G) and vulval induction index (H) for indicated genotypes fed either with OP50 (gray) or DA1877 (blue).  
1061 (I-K) Number of corpses (I), oocytes (J) and vulval induction index (K) for indicated genotypes fed with OP50  
1062 and supplemented with 64 nM B12. Dots (in C, D, F, G, I, J) represent individual corpses/oocytes or animals (in  
1063 E, H, K) from two independent biological replicates; number of animals in brackets; data represent median  $\pm$  min  
1064 and max. For statistical analysis see STAR methods. \*\*\*\*<0.0001; \*\*\*<0.0005; \*\*<0.005; ns, non-significant.  
1065

Laranjeira et al. 2023

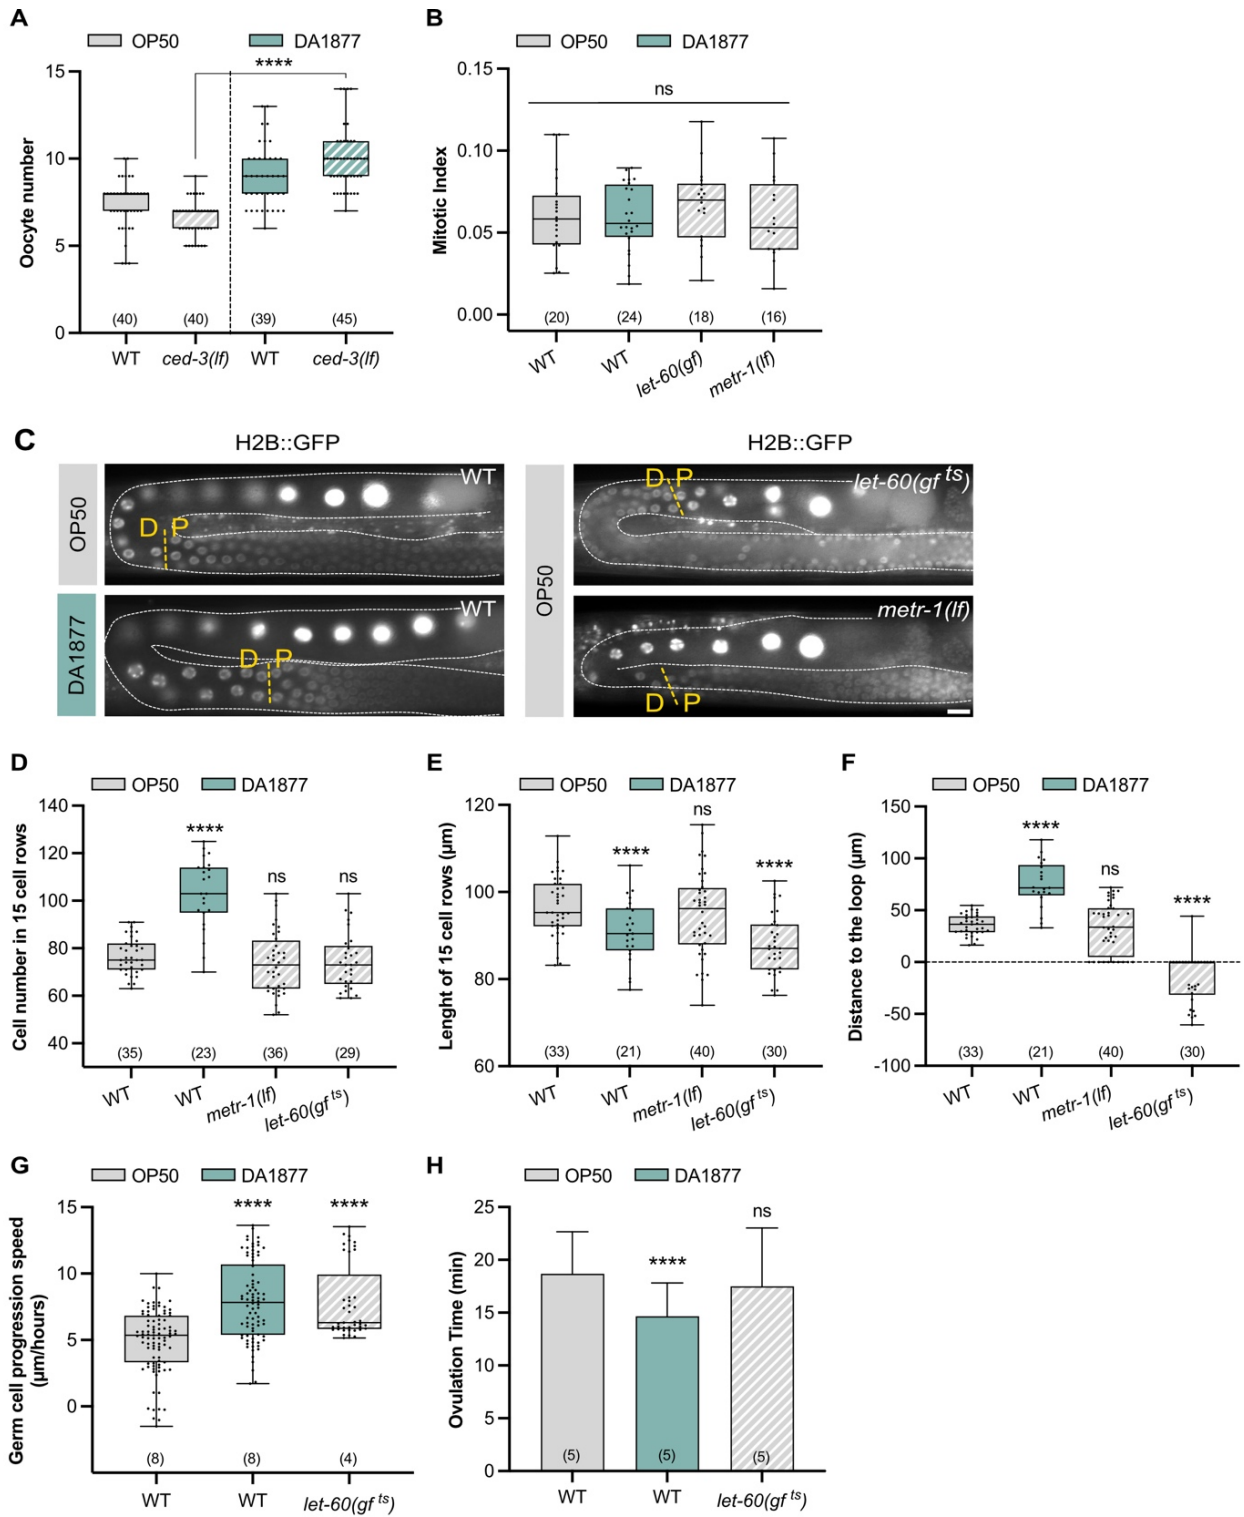

1066  
1067



1068 **Figure 2. The DA1877 diet changes germ cell number and dynamics.**  
1069 (A) Oocyte number for indicated genotypes; dots represent individual oocytes. (B) Mitotic index for indicated  
1070 genotypes; dots represent individual animals. (C) Fluorescence images showing the pachytene-to-diplotene (P-D)  
1071 transition (yellow dashed lines) for indicated genotypes; germ cell nuclei are marked with H2B::GFP; gonads are  
1072 outlined by white dashed lines; scale bar: 10  $\mu$ m. (D) Number of cells inside an area starting from the P-D and  
1073 ending 15 cell-rows distally of indicated genotypes; P-D was determined based on the nuclear marker shown in  
1074 (C); in *let-60(gf)* animals the loop region was used as the starting point. (E) Length of 15-cell rows for indicated  
1075 genotypes. (F) Distance from the P-D to the loop region for indicated genotypes. (D-F) dots represent individual  
1076 animals. (G) Speed of germ cell progression through the pachytene region for indicated genotypes; for individual  
1077 tracking see Figure S2; dots represent the speed of individual cells. (H) Ovulation time for indicated genotypes;  
1078 dots represent individual oocytes; bars represent mean  $\pm$  SD. (A-H) Animals were fed with OP50 (gray) or  
1079 DA1877 (blue). Number of animals in brackets; data represent median  $\pm$  min and max. For statistical analysis see  
1080 STAR methods. \*\*\*\*  $<0.0001$ ; ns, non-significant.  
1081

Laranjeira et al. 2023

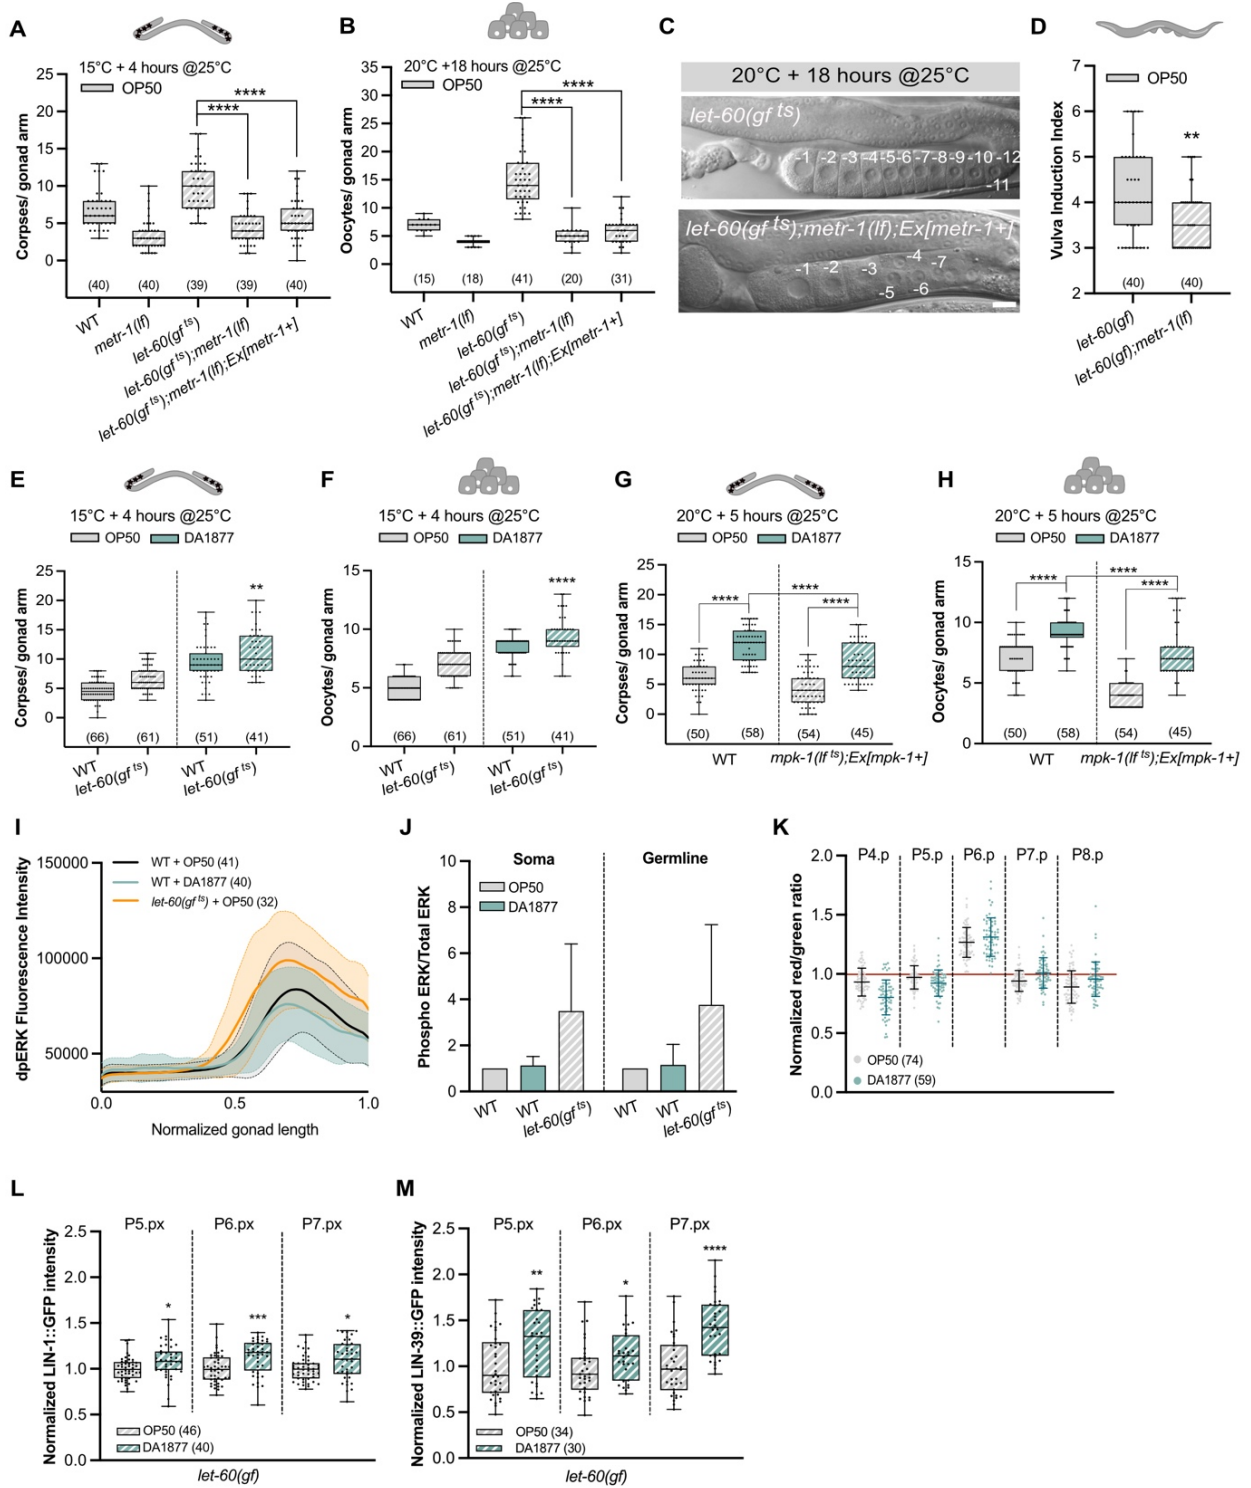

1082  
1083

1084 **Figure 3. Interaction of the one-carbon metabolism and the RAS/MAPK pathway.**

1085 (A-B) Number of corpses for indicated genotypes grown at 15°C and transferred to 25°C 4 hours before  
1086 quantification (A) and oocyte number for indicated genotypes grown at 20°C and transferred to 25°C 18 hours  
1087 before quantification (B). (C) DIC images of gonads for indicated genotypes grown at 20°C and transferred to  
1088 25°C 18 hours before quantification; numbers indicate mature oocytes; scale bar: 10  $\mu$ m. (D) Vulval induction  
1089 index for indicated genotypes. (A-D) Animals were fed with OP50. (E-F) Number of corpses (E) and oocytes (F)  
1090 for indicated genotypes grown at 15°C and transferred to 25°C 4 hours before quantification. (G-H) Number of  
1091 corpses (G) or oocytes (H) for indicated genotypes grown at 20°C and transferred to 25°C 5 hours before  
1092 quantification. (E-H) Animals were fed with OP50 (gray) or DA1877 (blue). (I) Summed intensity profile of  
1093 dpERK staining along the distal-proximal axis of dissected gonads of wild-type fed with OP50 (gray) or DA1877  
1094 (blue), and *let-60(gf<sup>ts</sup>)* fed with OP50 (orange); x-axis represents normalized gonad length, from distal (x=0) to  
1095 loop (x=1); the full line represents the average intensity  $\pm$  SD (shaded); data from three independent biological  
1096 replicates. (J) Western blot quantification of the somatic or germline isoform of phosphorylated and total ERK for  
1097 indicated genotypes; bars represent mean  $\pm$  SD normalized to the control (wild-type OP50) from three independent  
1098 biological and technical replicates; see Figure S3 for the individual Western blots. (K) ERK-nKTR biosensor  
1099 quantification; in the VPCs normalized red/green ratio in individual VPCs; dots represent different animals from  
1100 2 independent biological replicates. (L-M) Normalized intensity of LIN-1::GFP (L) or LIN-39::GFP (M) in the  
1101 two-cell (Pn.px) stage in 1° and 2° VPCs of *let-60(gf)* animals; data were normalized to the control (OP50); dots  
1102 represent individual animals from two independent biological replicates. (J-M) Animals were fed with OP50  
1103 (gray) or DA1877 (blue). Number of animals is shown in brackets; data represent median  $\pm$  min and max. For  
1104 statistical analysis, see STAR methods. \*\*\*\* <0.0001; \*\*\*<0.0005; \*\*<0.005; \*<0.05.

1105

Laranjeira et al. 2023

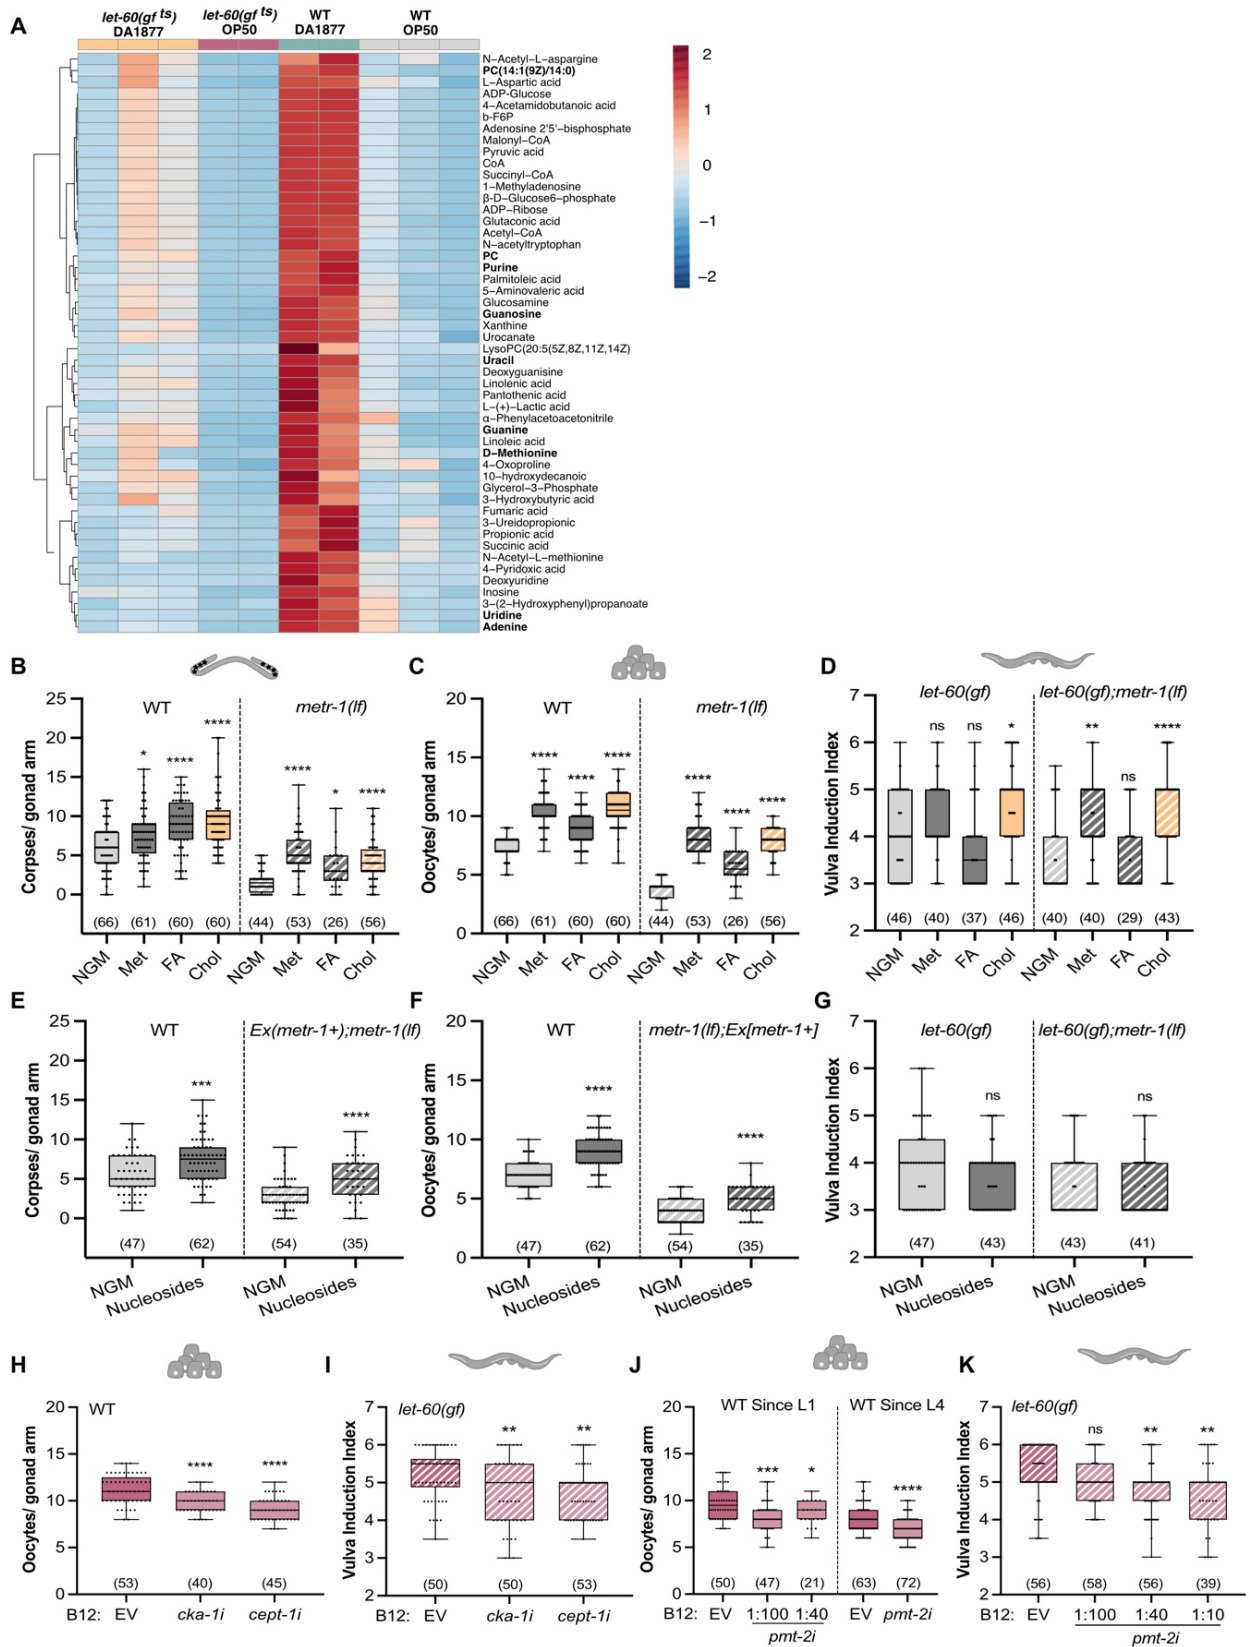

1106

1107

1108

1109 **Figure 4. One-carbon metabolites regulate VPC and germline differentiation.**

1110 (A) Heat map of top 50 changed metabolites of the vitamin B12-dependent metabolism for indicated genotypes;  
1111 *let-60(gf<sup>ts</sup>)* animals were transferred to 25°C 4 hours before sample collection; statistical analysis using a one-  
1112 way ANOVA, considering a minimum p-value of 0.05. (B-G) Number of corpses (B, E), oocytes (C, F) and vulval  
1113 induction index (D, G) for indicated genotypes fed with OP50 and supplemented with the following metabolites;  
1114 Met – 5 mM methionine; FA – 100 µM folinic acid; Chol – 40 mM choline; 1 µM nucleosides. (H-K) Oocyte  
1115 number of wild-type animals (H, J) and vulval induction index of *let-60(gf)* animals (I, K) fed with indicated  
1116 RNAi clones or control (EV – empty vector); NGM was supplemented with 64 nM of B12; animals were exposed  
1117 to RNAi from L1 except where indicated (L4). (B-K) Dots represent individual corpses/oocytes or animals (D, G,  
1118 I, K) from two independent biological replicates; data represent median ± min and max; number of animals in  
1119 brackets. For statistical analysis, see STAR methods. \*\*\*\* <0.0001; \*\*\*<0.0005; \*\*<0.005; \*<0.05; ns, non-  
1120 significant.

1121

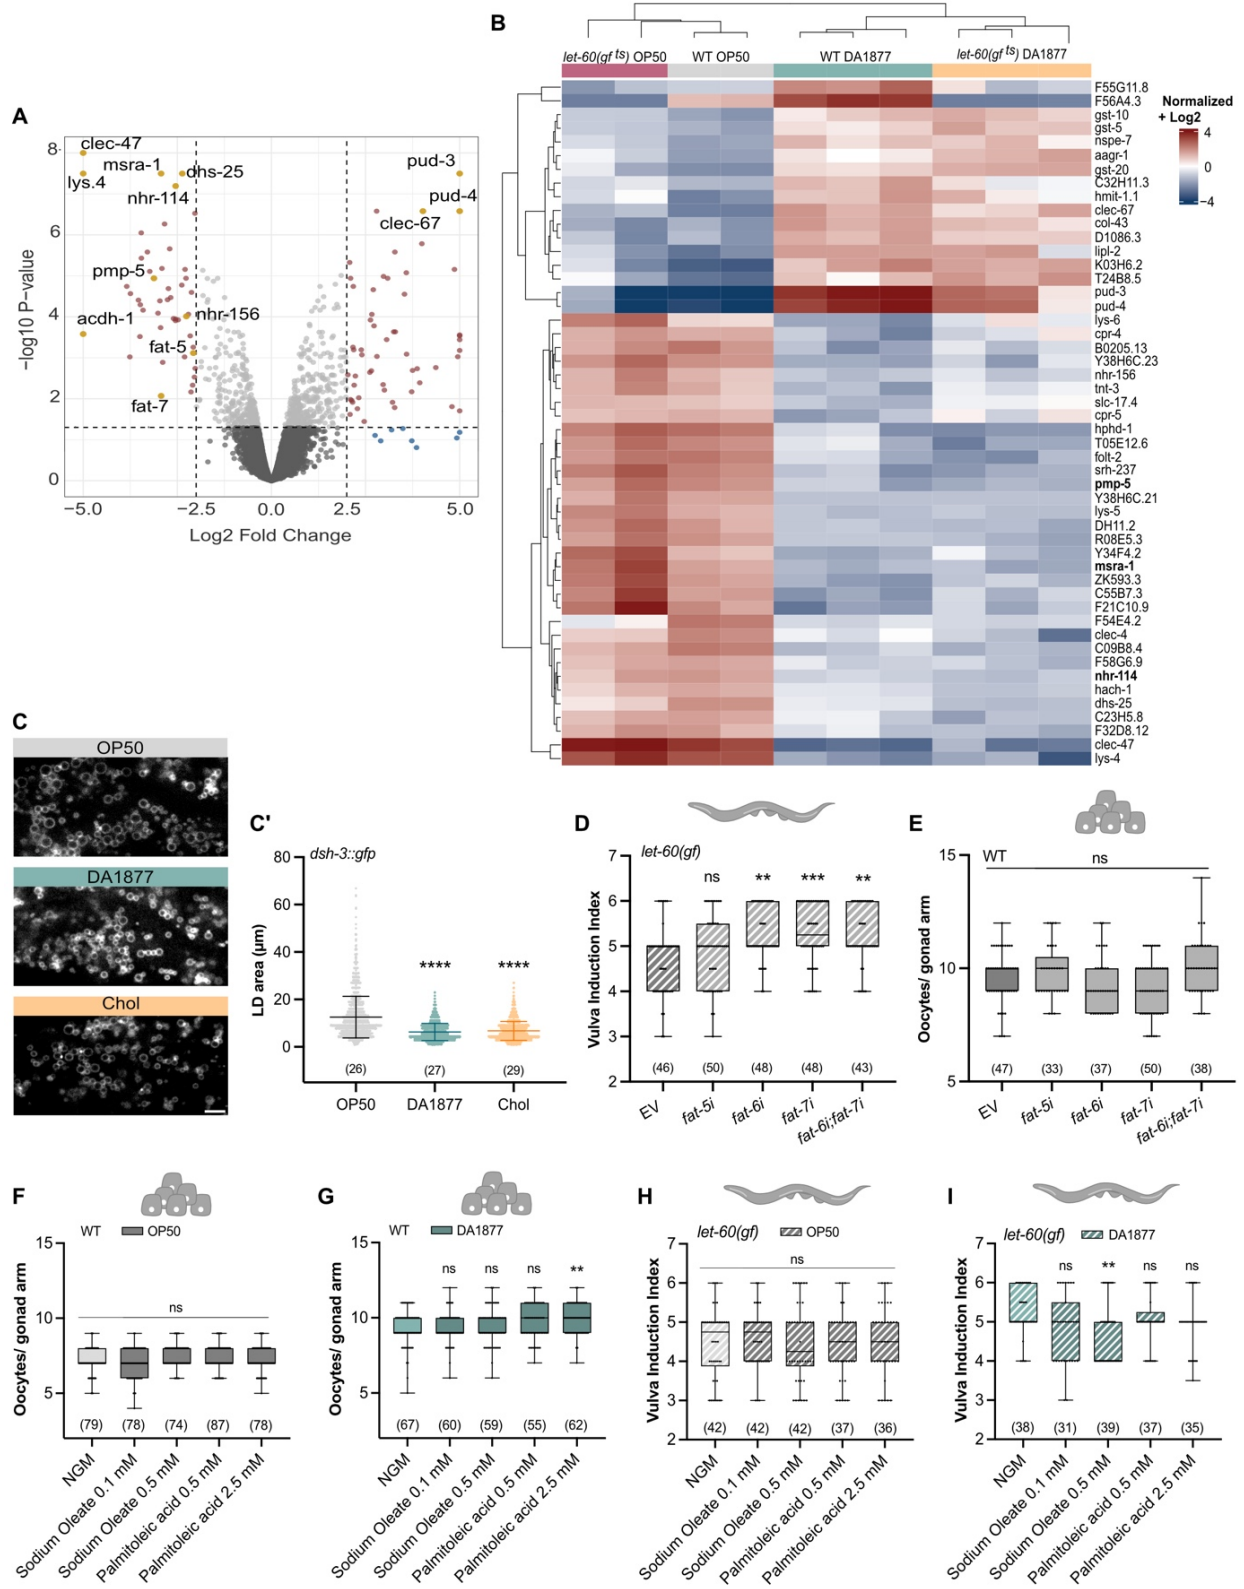

1122

1123



1124 **Figure 5. Dietary effects on gene expression and lipid metabolism.**

1125 (A) Differentially expressed genes in adult wild-type animals fed with OP50 or DA1877; p-values calculated  
1126 with FDR values and threshold for p-value 0.05 are shown. (B) Top 50 differentially expressed genes for indicated  
1127 genotypes. (C) Fluorescence images of *dsh-3::gfp* marking intestinal lipid droplets (LD) in animals fed with OP50  
1128 (gray), DA1877 (blue) or OP50 supplemented with 40 mM choline (yellow). (C') Area of intestinal LD; dots  
1129 represent individual droplet areas of 100 droplets per animal, from two independent biological replicates. (D-E)  
1130 vulval induction index of *let-60(gf)* animals (D) or oocyte number of wild-type animals (E) fed with indicated  
1131 RNAi clones and control (EV – empty vector). (F-I) Oocyte number of wild-type animals (F, G) or vulval  
1132 induction index of *let-60(gf)* animals (H, I) fed with OP50 (gray) (F, H) or DA1877 (blue) (G, I) supplemented  
1133 with indicated fatty acids. (D-I) dots represent individual oocytes (E, F, G) or animals (D, H, I) from two  
1134 independent biological replicates; data represent median  $\pm$  min and max; number of animals in brackets. For  
1135 statistical analysis, see STAR methods. \*\*\*\*  $<0.0001$ ; \*\*\*  $<0.0005$ ; \*\*  $<0.005$ ; ns, non-significant.

1136

1137

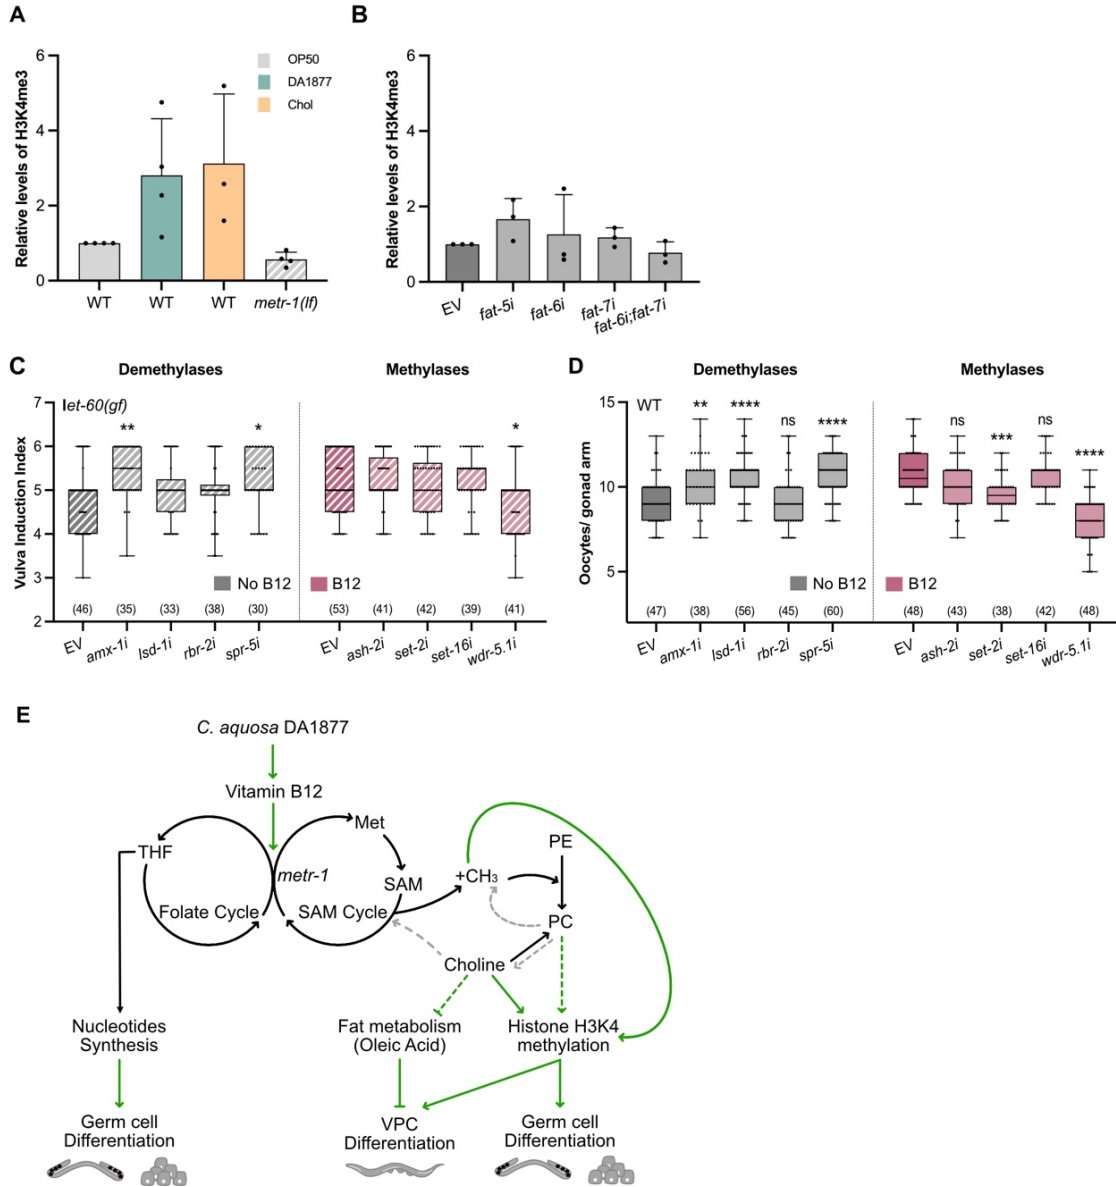

1138

1139

1140 **Figure 6. The DA1877 diet increases H3K4 methylation to regulate VPC and oocyte differentiation.**  
1141 (A) Western blot quantification of tri-methylated H3K4 for indicated genotypes fed with OP50 (gray), DA1877  
1142 (blue) or OP50 supplemented with 40 mM choline (yellow); levels of tri-methylated H3K4 were normalized to  
1143 total H3 levels; bars represent mean  $\pm$  SD, normalized to the control (wild-type OP50), from four independent  
1144 biological and technical replicates. (B) Western blot quantification of tri-methylated H3K4 in wild-type animals  
1145 fed with indicated RNAi clones; levels of tri-methylated H3K4 were normalized to total H3 levels; bars represent  
1146 mean  $\pm$  SD, normalized to the control (wild-type EV), from three independent biological and technical replicates.  
1147 (C-D) Vulval induction of *let-60(gf)* animals (C) and oocyte number of wild-type animals (D) fed with indicated  
1148 RNAi clones or control (EV – empty vector); non-supplemented NGM (gray) or supplemented with 64 nM B12  
1149 (pink); dots represent individual animals (C) or oocytes (D) from two independent biological replicates; data  
1150 represent median  $\pm$  min and max; number of animals in brackets. (E) Model depicting the tissue-specific effects  
1151 of the one-carbon metabolism on nucleosides synthesis, fat metabolism and histone methylation and its effects on  
1152 germ cell and VPCs differentiation; green arrows are interactions supported by this work; dashed arrows are  
1153 hypothesized from literature (gray) or conclusions made in this work (green). For statistical analysis, see STAR  
1154 methods. \*\*\*<0.0005; \*\*\*<0.0005; \*\*<0.005; \*<0.05; ns, non-significant.  
1155

Laranjeira et al. 2023

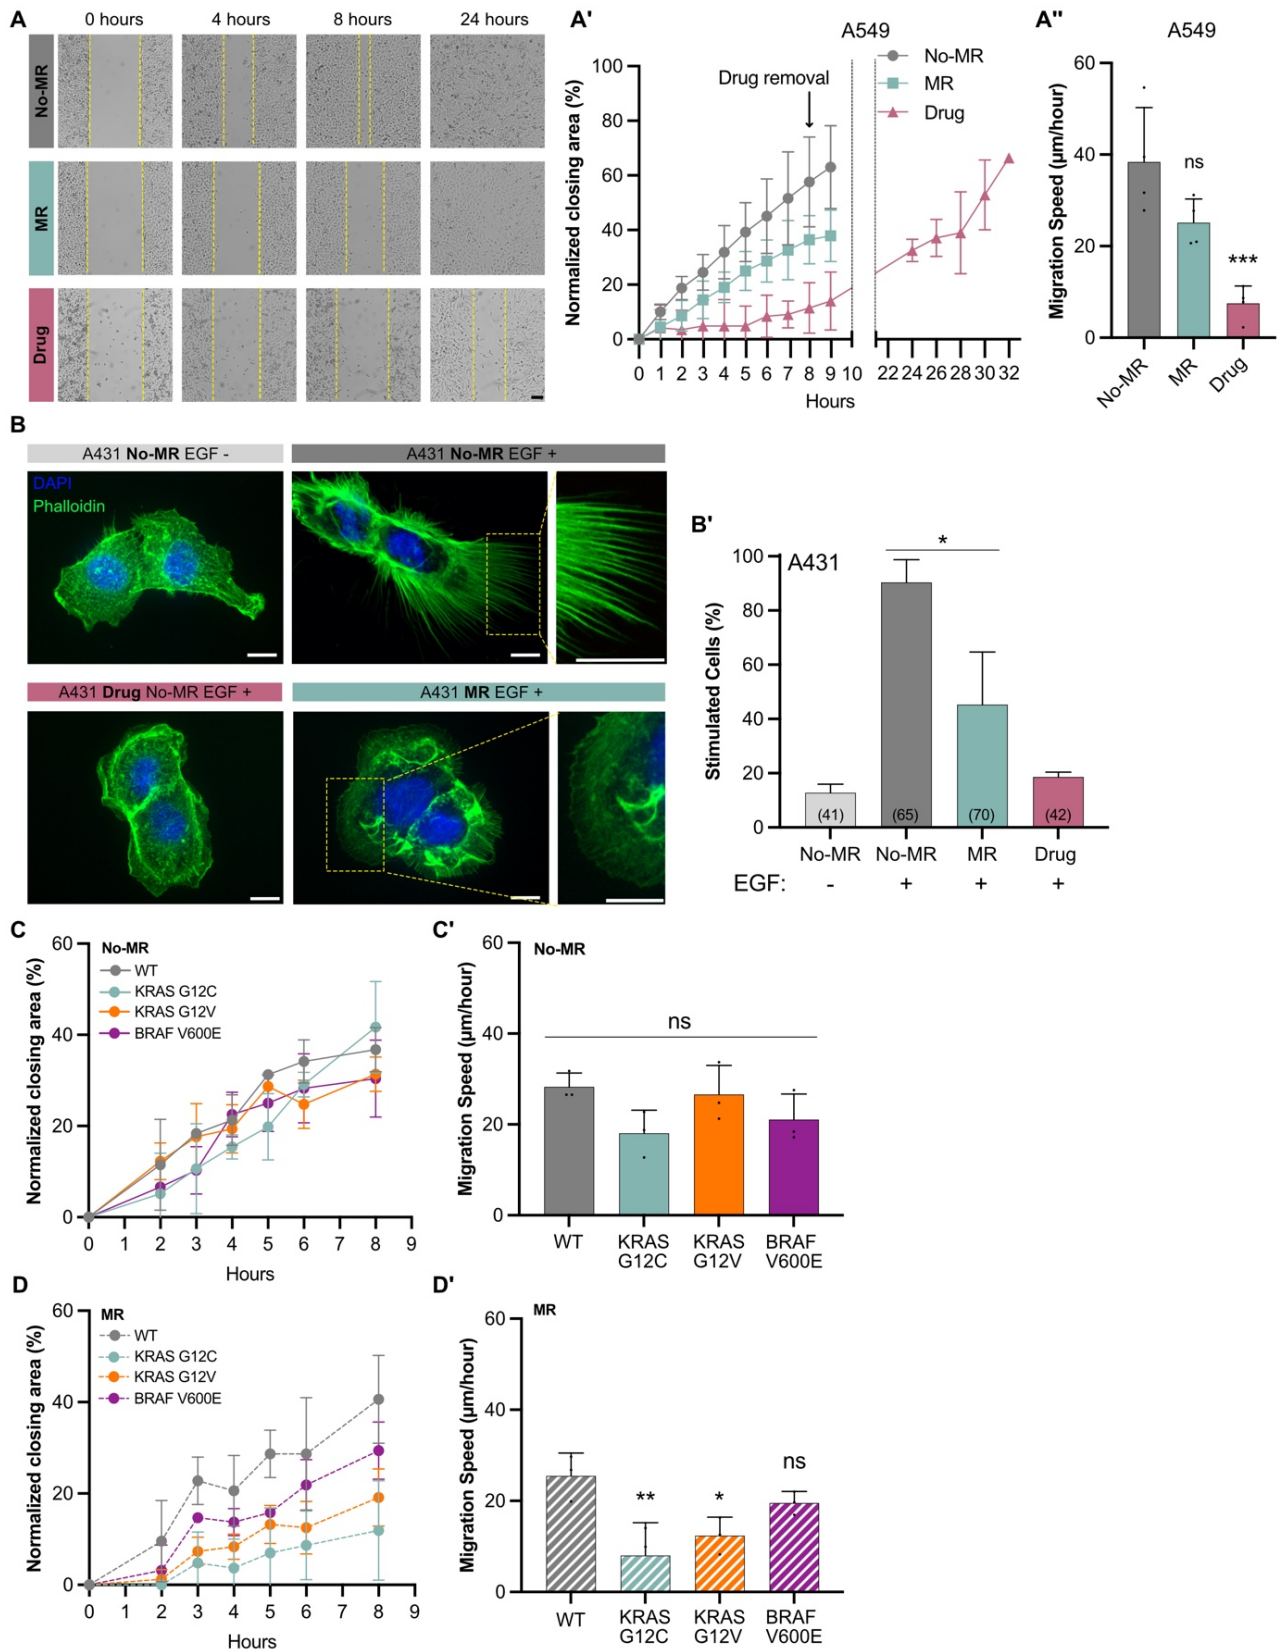

1156

1157

1158 **Figure 7. Methionine dependency of RAS/MAPK-induced phenotypes in mammalian cells.**

1159 (A) Collective migration of A459 cells grown with MR (0  $\mu$ M Met; 400  $\mu$ M Hcy) (blue), without MR (200  $\mu$ M  
1160 Met; 400  $\mu$ M Hcy) (gray), or treated with 1  $\mu$ M MEK162 and 1  $\mu$ M LGX818 MEK inhibitors (pink); yellow  
1161 dashed lines represent the migrating front over time. (A') Normalized percentage of the area closed over time;  
1162 symbols indicate mean  $\pm$  SD from four independent biological replicates. (A'') Migration speed was calculated as  
1163 the slope of graphs shown in A'; bars represent the mean  $\pm$  SD. (B) Staining of A431 cells with DAPI (blue) and  
1164 phalloidin (green), with and without EGF stimulation or MR; scale bar: 10  $\mu$ m; for additional examples and the  
1165 scoring criteria, see Figures S8. (B') Percentage of stimulated cells with filopodia under indicated conditions; bars  
1166 represent mean  $\pm$  SD from three independent biological replicates; total number of cells scored in brackets. (C-  
1167 D') Quantification of collective migration in MEFs expressing different KRAS and BRAF mutations grown  
1168 without (C) and with MR (D). (C-D) Normalized percentage of area closed over time; data represents mean  $\pm$  SD  
1169 from three independent biological replicates. (C'-D') Migration speed was calculated as the slope of graphs shown  
1170 in C and D respectively; bars represent the mean  $\pm$  SD. For statistical analysis, see STAR methods. \*\*<0.005;  
1171 \*<0.05; ns, non-significant.

1172

Supplementary Figures and Legends

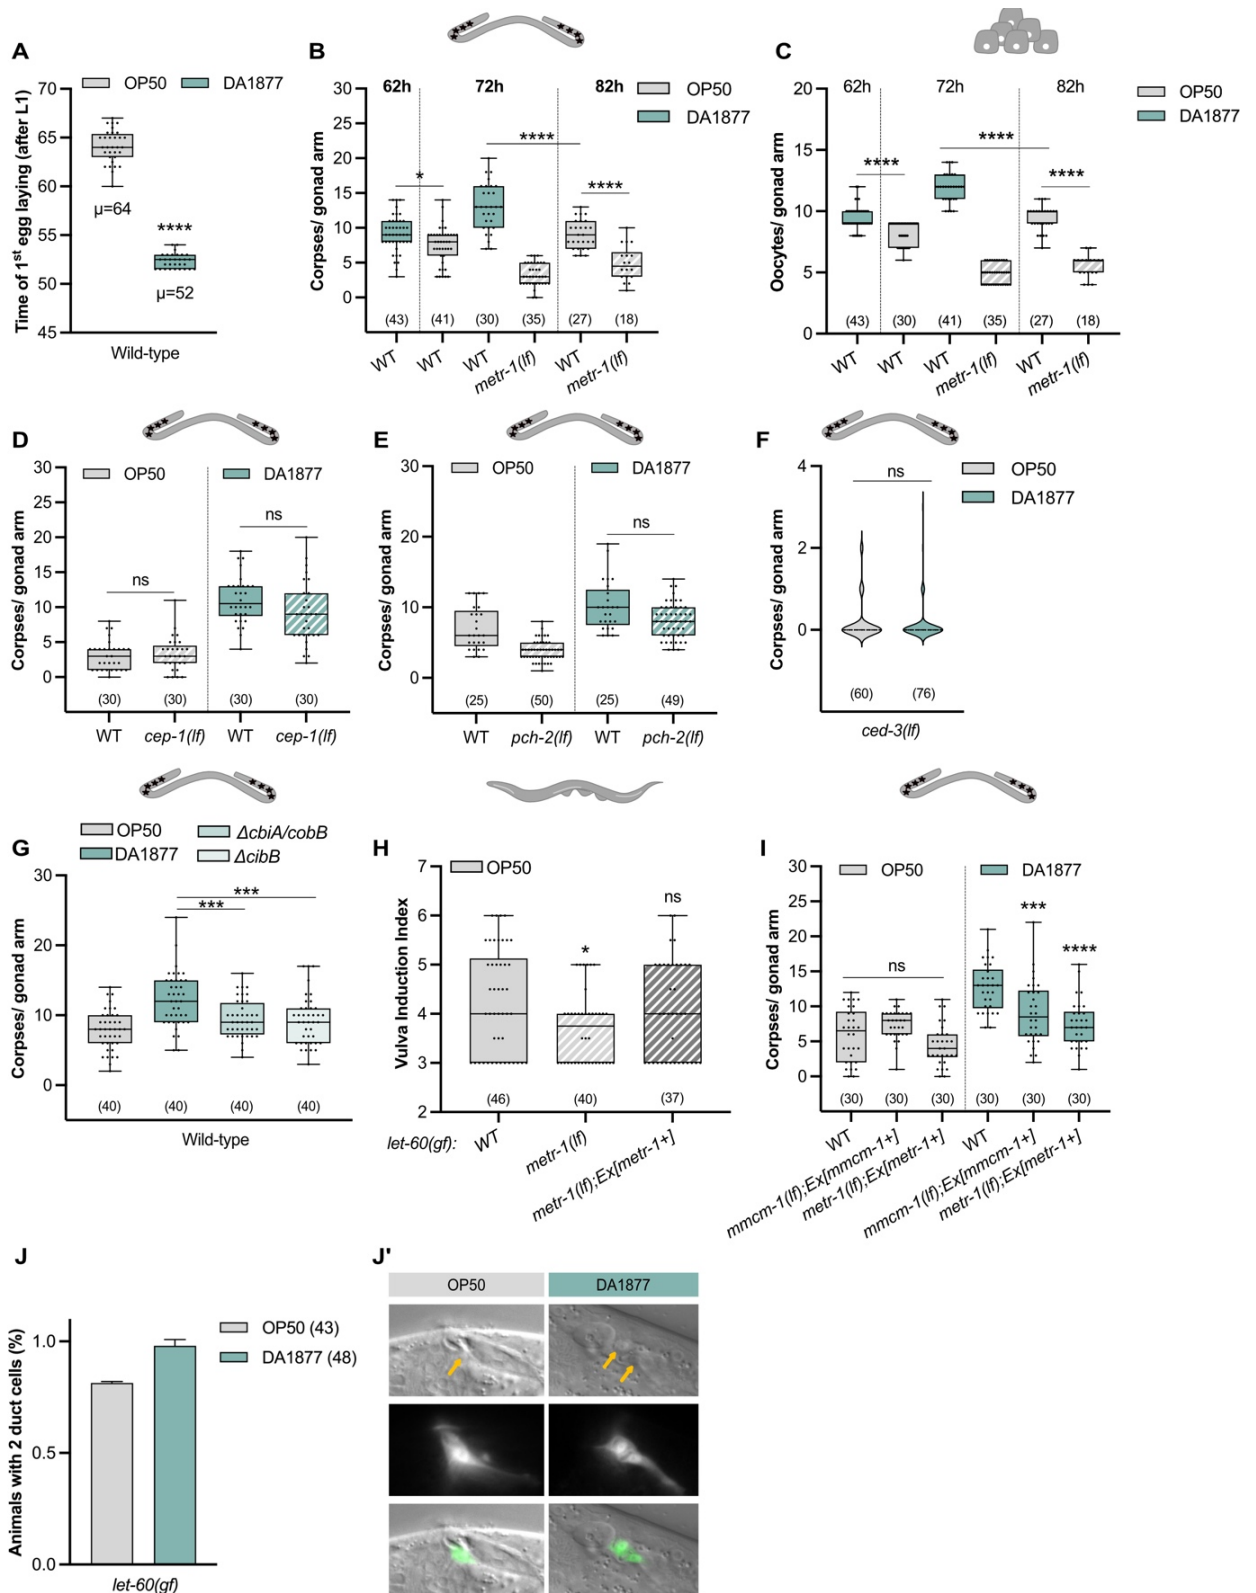



1176 **Figure S1. Dietary vitamin B12 effect on germline, vulva and duct cell specification.**

1177 (A) Time of first egg laying after L1 in wild-type worms fed with OP50 (gray) or DA1877 (blue). (B-C) Number  
1178 of corpses (B) or oocytes (C) for indicated genotypes 62, 72 and 82 hours after L1 starvation; animals were fed  
1179 with OP50 (gray) or DA1877 (blue). (D-F) Number of corpses for indicated genotypes fed with OP50 (gray) or  
1180 DA1877 (blue). (G) Number of corpses in wild-type animals fed with OP50 (gray), wild-type DA1877 (blue) or  
1181 DA1877 mutants deficient in B12 synthesis (light blue). (H) Vulval induction index for indicated genotypes fed  
1182 with OP50. (I) Number of corpses for indicated genotypes fed with OP50 (gray) or DA1877 (blue). (A-I) Data  
1183 represent median  $\pm$  min and max. (J) Percentage of *let-60(gf)* animals with two duct cells, animals were fed with  
1184 OP50 (gray) or DA1877 (blue); bars represent mean  $\pm$  SD. (J') DIC and fluorescence images of *let-60(gf)* animals  
1185 expressing the LIN-48::GFP duct cell marker.; yellow arrows indicate the duct cell; scale bar: 10 $\mu$ m. (A-G, I) dots  
1186 represent individual corpses/oocytes; (H) dots represent individual animals; number of animals in brackets. For  
1187 statistical analysis, see STAR methods. \*\*\*\* <0.0001; \*\*\*<0.0005; \*<0.05; ns - non-significant.

1188

Laranjeira et al. 2023

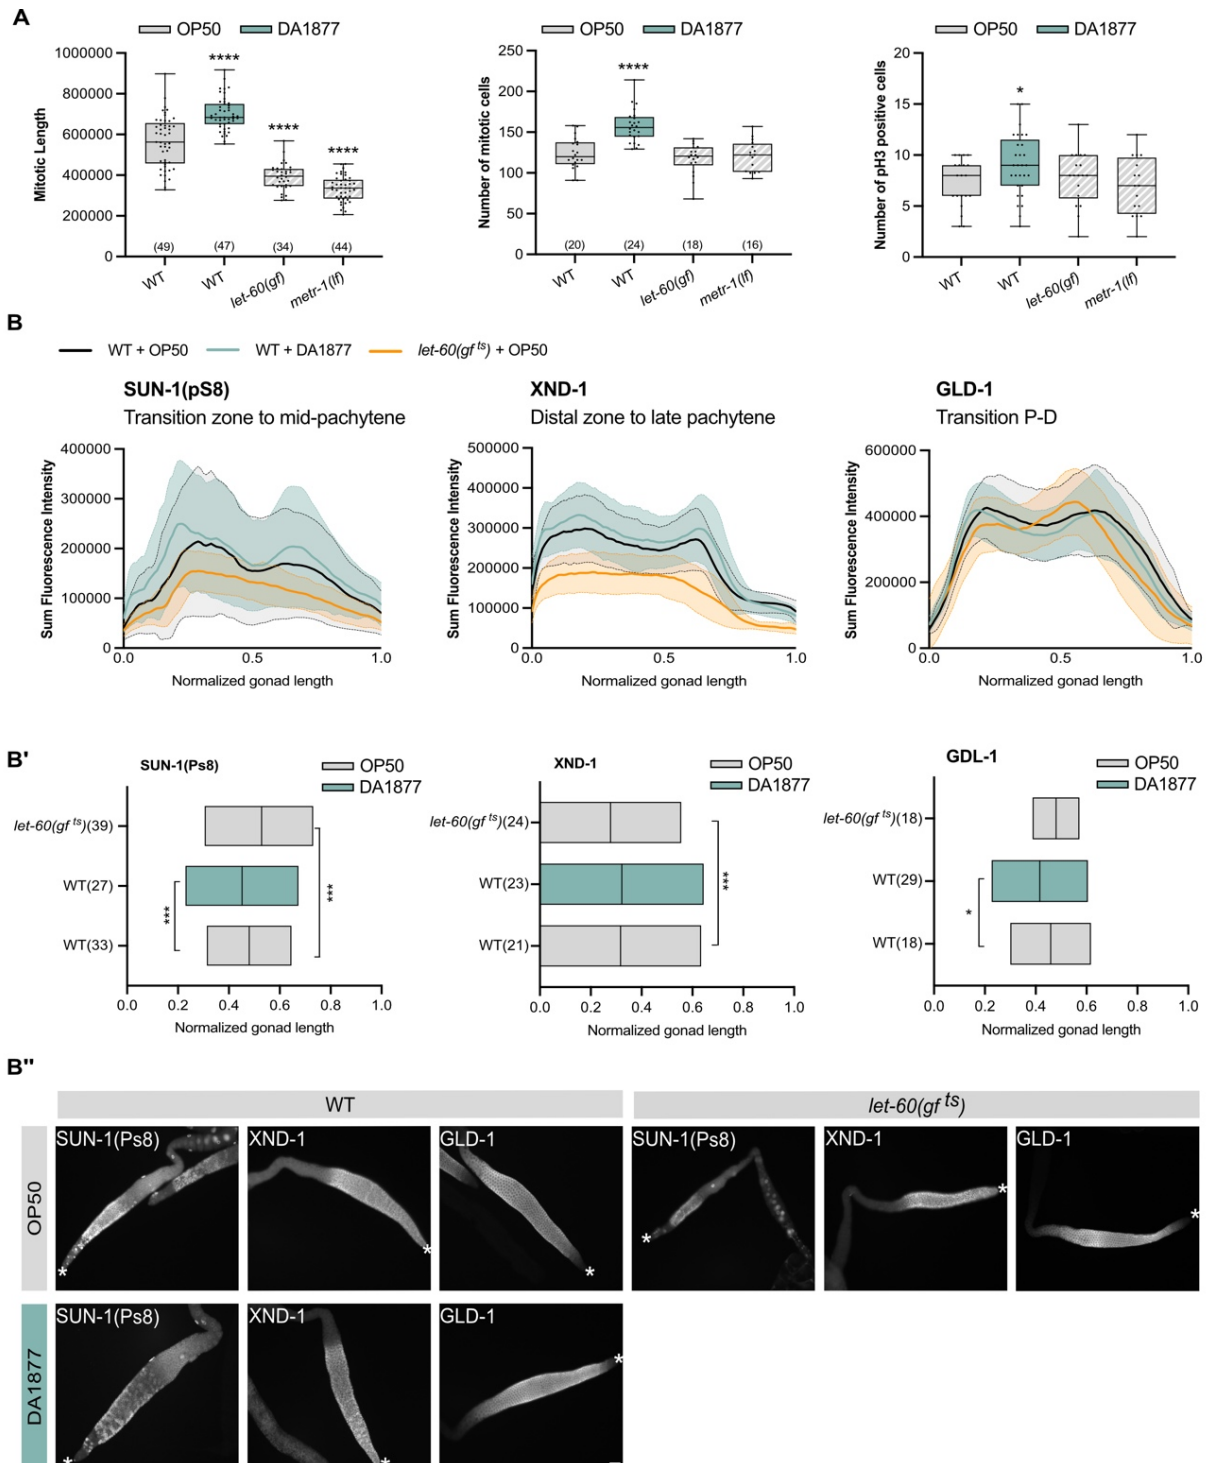

1189

1190

1191 **Figure S2. Effects of the DA1877 diet on germline dynamics.**

1192 (A) Length of the mitotic zone, number of mitotic cells and number of M-phase germ cells (pH3 positive) for  
1193 indicated genotypes fed with OP50 (gray) or DA188 (blue); dots present individual animals; data represents  
1194 median  $\pm$  min and max; number of animals represented in brackets. (B) Summed intensity profile of SUN-1(pS8),  
1195 XND-1 and GLD-1 staining along the distal-proximal axis of dissected gonads. In wild-type animals fed with  
1196 OP50 (black), SUN-1(pS8) accumulates from the transition zone until mid-pachytene; XND-1 starts at the distal  
1197 tip and accumulates until late-pachytene; GLD-1 marks the transition between pachytene and diplotene. Animals  
1198 were fed OP50 (gray) or DA1877 (blue), and *let-60(gf<sup>ts</sup>)* animals were fed on OP50 (orange) and transferred to  
1199 25°C 2 hours before the experiment. The x-axis represents the normalized distance along the gonad, from distal  
1200 (x=0) to the loop (x=1); lines indicate average intensity  $\pm$  SD (shaded). (B') Analysis for SUN-1, XND-1 and  
1201 GLD-1 immunostainings. Graphs represent the location of the maximum intensity peaks for the distal (beginning  
1202 of expressions) or proximal (end of expression) part of the gonad (from B); the x-axis represents the normalized  
1203 distance; bars represent median  $\pm$  min and max. (B'') Examples of immunostaining of dissected gonads of wild-  
1204 type animals fed with OP50 (gray) or DA1877 (blue), and *let-60(gf<sup>ts</sup>)* animals fed with OP50 (gray); white stars  
1205 indicate the distal tip cell; scale bar: 10  $\mu$ m. For statistical analysis see STAR methods. \*\*\*\* <0.0001;  
1206 \*\*\*<0.0005; \*<0.05.

1207

Laranjeira et al. 2023

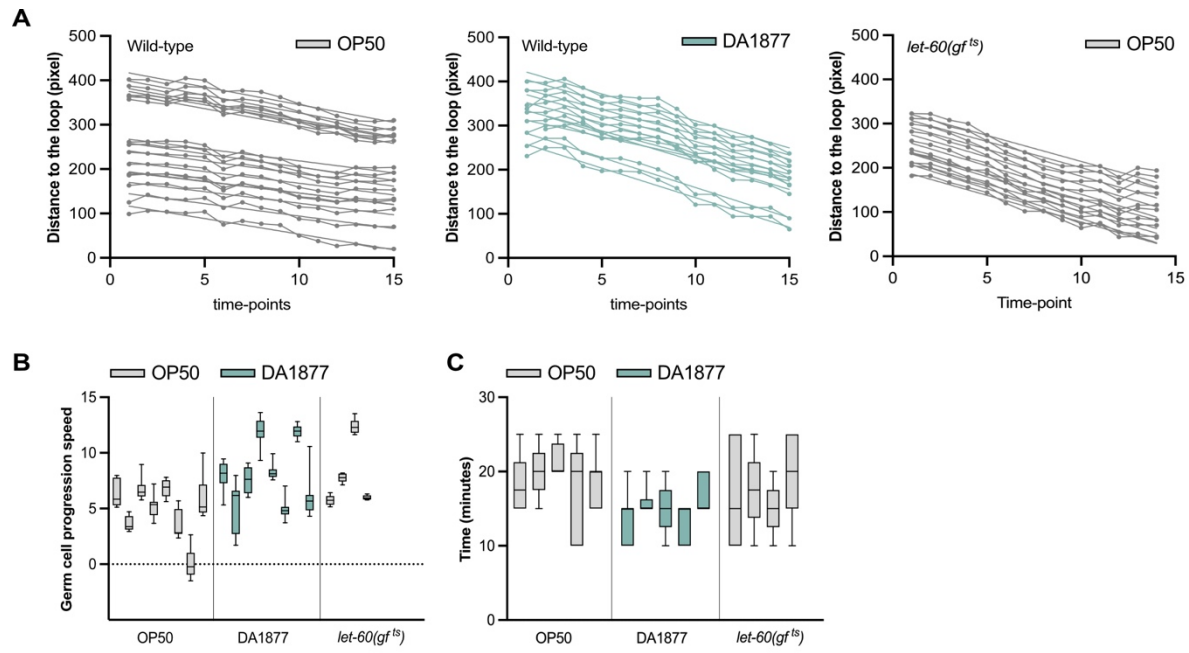

1208

1209

**Figure S3. Effects of the DA1877 diet on germ cell migration and ovulation rate.**

1210

(A) Tracking of individual germ cells within the pachytene region over time for indicated genotypes; pachytene

1211

stage germ cells before the loop were tracked for 2 hours; migration speed was approximated for each graph as

1212

the slope of a linear regression, shown in Figure 2G. The graphs represent cells from one of eight animals tracked

1213

for the wild-type and four for *let-60(gf<sup>ts</sup>)* animals that were transferred to 25°C 2 hours before the experiment and

1214

imaged at 25°C. (B) Speed of tracked germ cells for individual animals. (C) Ovulation time for individual animals.

1215

(A-C) animals were fed with OP50 (gray) or DA1877 (blue).

Laranjeira et al. 2023

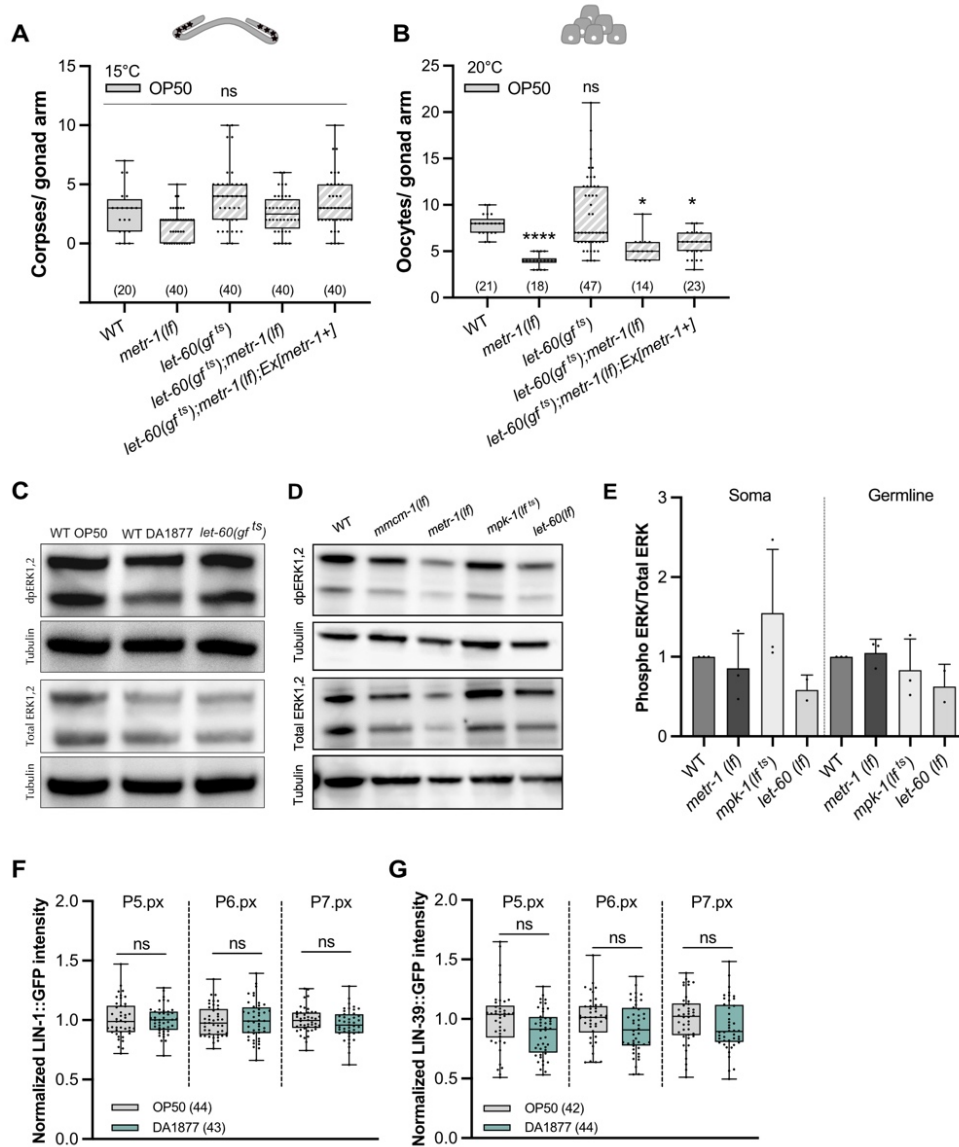

1216

1217 **Figure S4. Interaction of the one-carbon metabolism and the RAS/MAPK pathway.**

1218 (A-B) Number of corpses at 15°C (A) or oocytes at 20°C (B) for indicated genotype fed with OP50; dots represent

1219 individual corpses/oocytes; data represents median  $\pm$  min and max from 2 independent biological replicates. (C-

1220 D) Western blot for phosphorylated and total ERK for indicated genotypes. (E) Quantification of phosphorylated

1221 and total ERK for the somatic and germline isoforms for indicated genotypes; bars represent mean  $\pm$  SD

1222 normalized to the control (WT OP50) from 3 independent biological and technical replicates. (F-G) Normalized

1223 intensity of LIN-1::GFP (F) or LIN-39::GFP (G) in 1° and 2° VPC at the two-cell Pn.px stage in the wild-type fed

1224 with OP50 (gray) or DA1877 (blue); data was normalized to the control (OP50); dots represent individual animals

1225 from 2 independent biological replicates; data represents median  $\pm$  min and max. (A-G) Number of animals shown

1226 in brackets. For statistical analysis see STAR methods. \* $<0.05$ ; ns, non-significant.

1227

Laranjeira et al. 2023

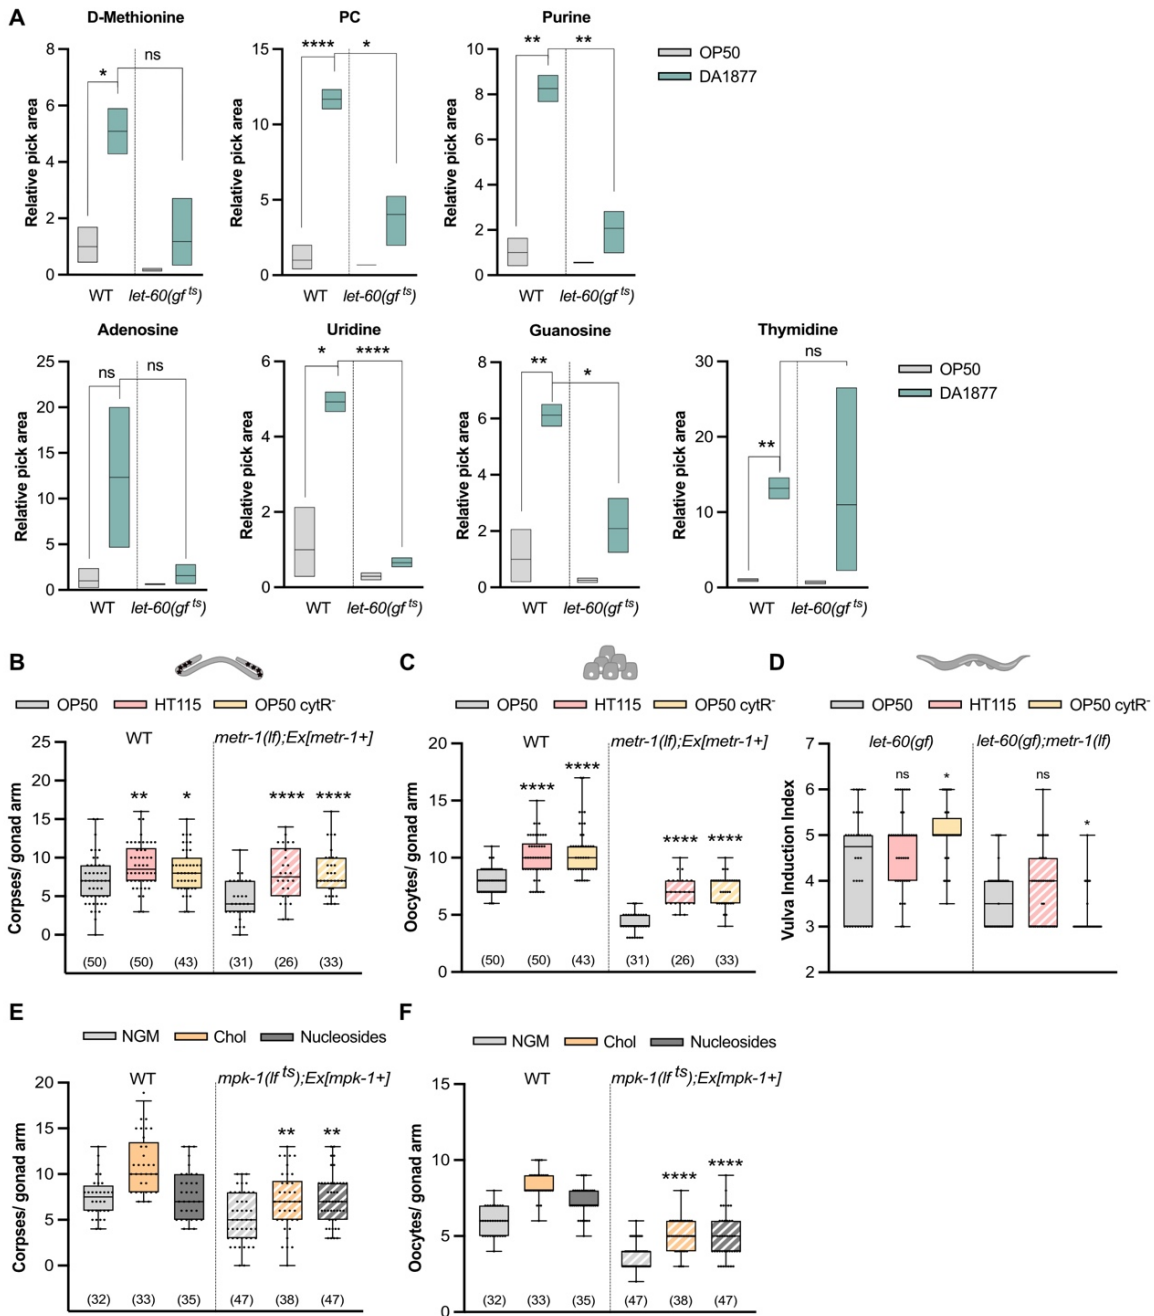

1228

1229

1230 **Figure S5. One-carbon metabolites regulate VPC and germ cell differentiation.**

1231 (A) Relative levels of selected metabolites in wild-type and *let-60(gf<sup>ts</sup>)* animals fed with OP50 (gray) or DA1877

1232 (blue); *let-60(gf<sup>ts</sup>)* animals were transferred to 25°C 4 hours before sample collection; peak areas were normalized

1233 to the control (wild-type OP50); bars represent mean ± min and max from 2 or 3 independent biological replicates.

1234 (B-D) Number of apoptotic corpses (B), oocytes (C) and vulval induction index (D) for indicated genotypes fed

1235 with *E. coli* OP50 (gray), *E. coli* HT115 (pink) or *E. coli* OP50 *cytR*<sup>-</sup> (yellow).

1236 (E, F) Number of apoptotic corpses (E) and oocytes (F) for indicated genotypes fed with OP50 and supplemented with 40 mM choline (orange) or 1

1237 mM nucleosides (dark gray). Dots represent individual corpses/oocytes or animals in (D) from 2 independent

1238 biological replicates; data represents median ± min and max; number of animals represented in brackets. For

1239 statistical analysis see STAR methods. \*\*\*\* <0.0001; \*\*<0.005; \*<0.05; ns, non-significant.



Laranjeira et al. 2023

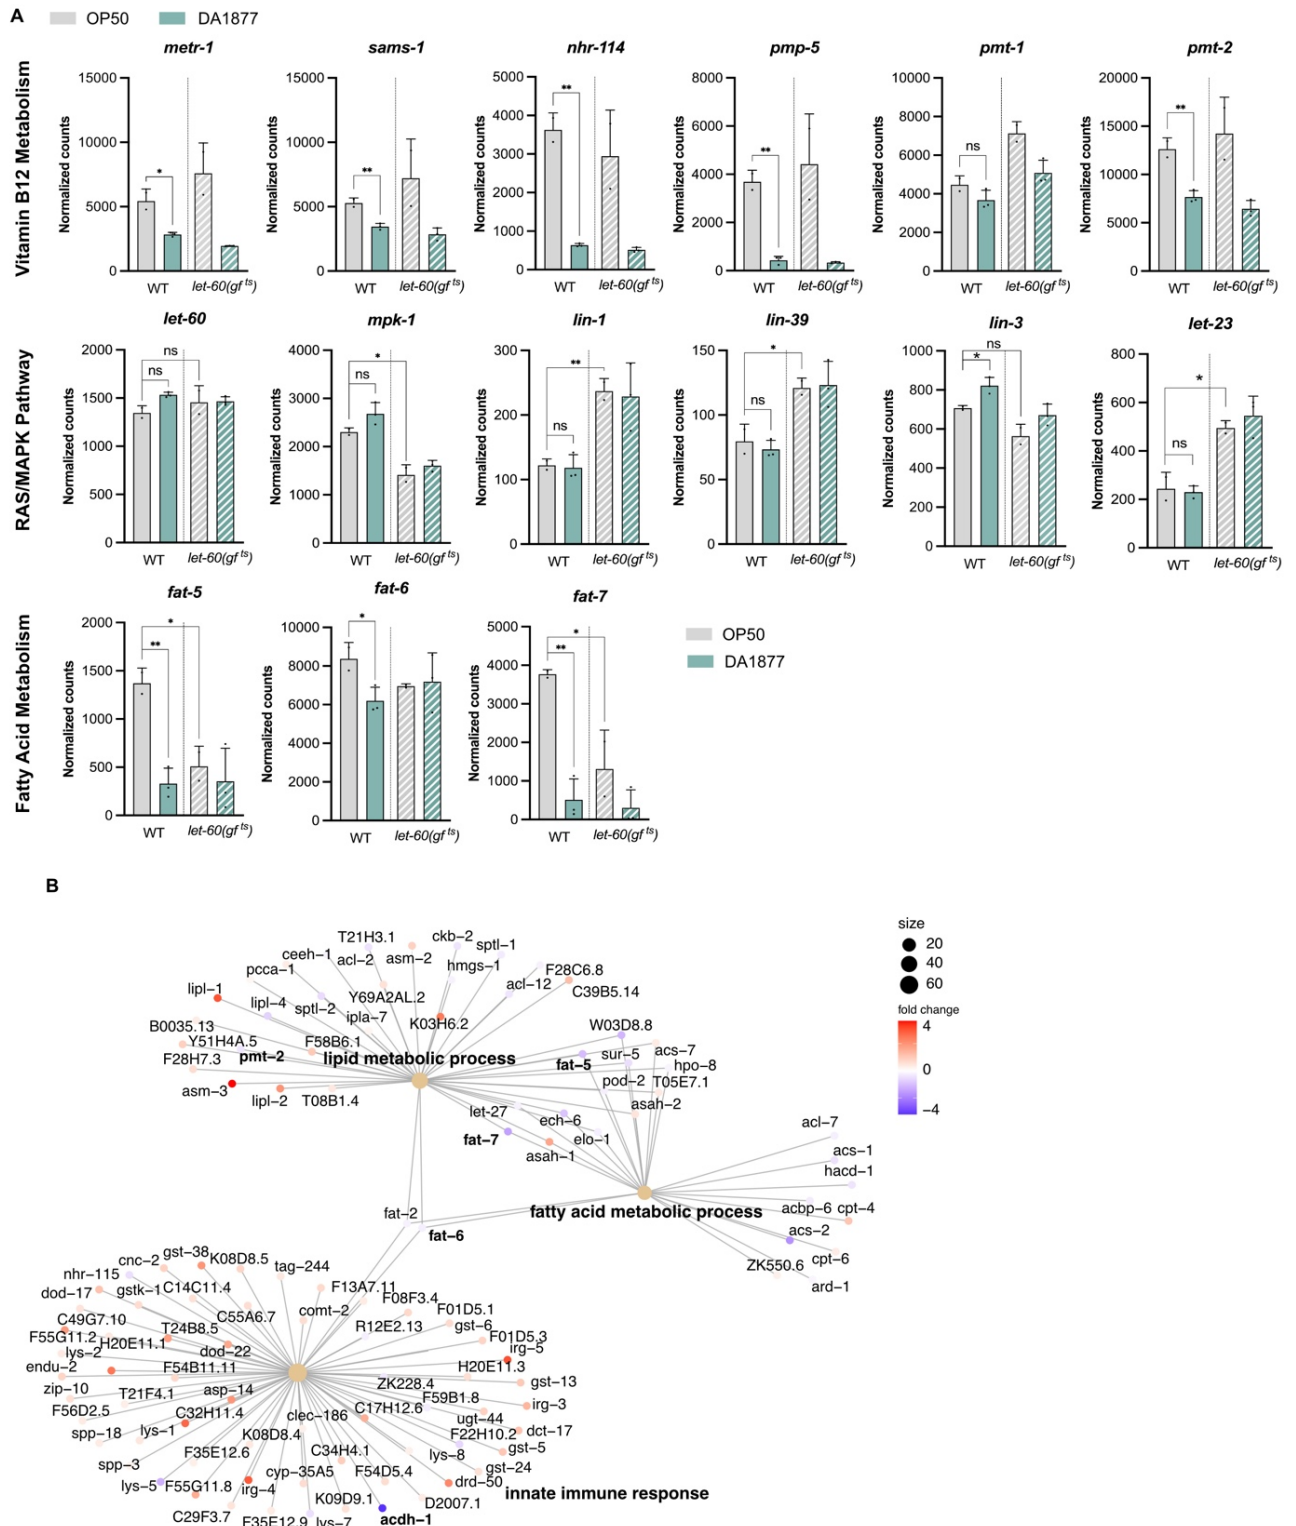

1240

1241 **Figure S6. Effect of the DA1877 diet on gene expression in adults.**

1242 (A) Differentially expressed genes in wild-type and *let-60(gf<sup>ts</sup>)* animals fed with OP50 (gray) or DA1877 (blue);

1243 *let-60(gf<sup>ts</sup>)* animals were transferred to 25°C 4 hours before sample collection; bars represent mean ± SD. (B)

1244 Pathway analysis of genes most strongly affected by the DA1877 diet in wild-type worms; circle sizes represent

1245 normalized counts and colors the fold change (see legend). For statistical analysis, see STAR methods. \*\*<0.005;

1246 \*\*<0.005; ns, non-significant.

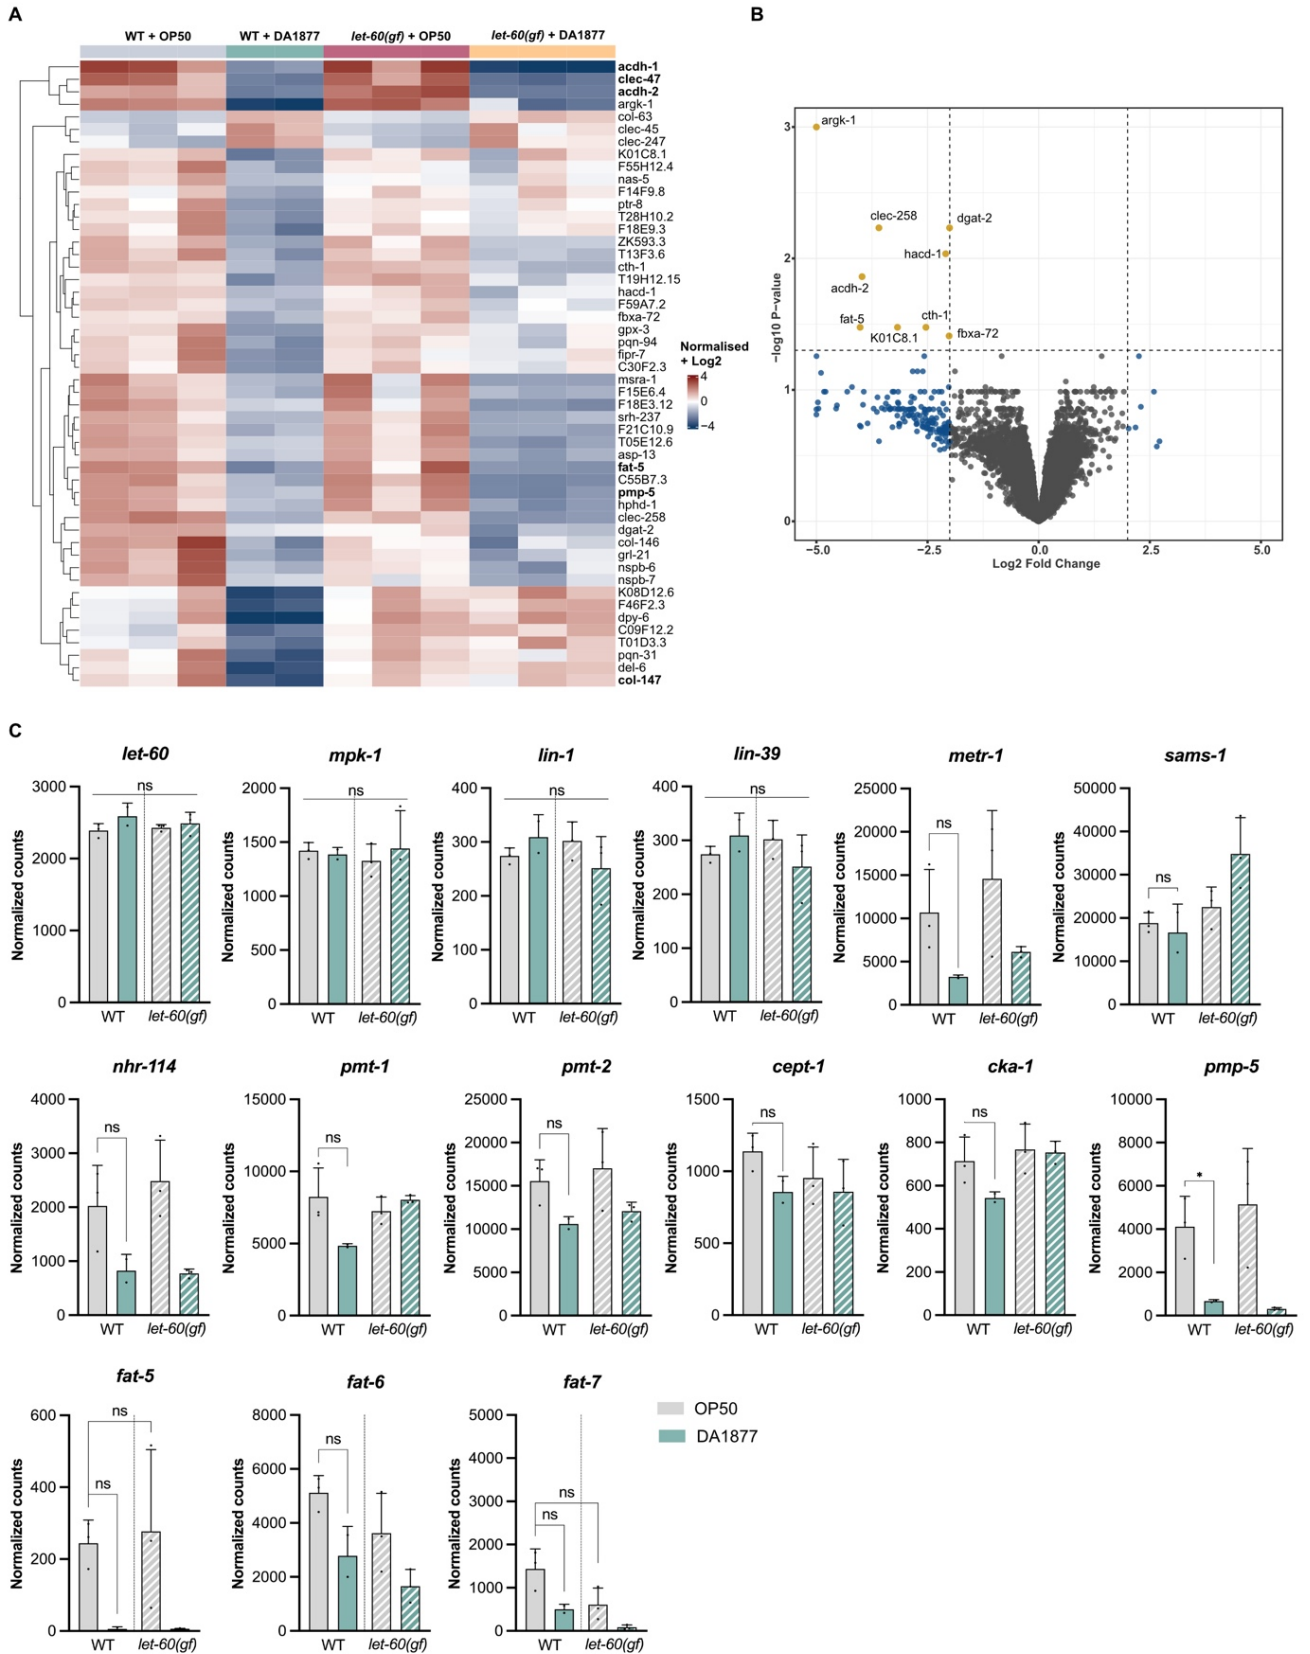

1247

1248

1249

Laranjeira et al. 2023

1250 **Figure S7. Effect of the DA1877 diet on gene expression in L3 larvae.**

1251 (A) Heat map of the top 50 differentially expressed genes for indicated genotypes. (B) Differentially expressed  
1252 genes in L3 larvae fed with OP50 or DA1877; p-value calculated with FDR values and threshold for p-value 0.05  
1253 are shown. (C) Differentially expressed selected genes in wild-type and *let-60(gf)* animals fed with OP50 (gray)  
1254 or DA1877 (blue); bars represent mean  $\pm$  SD. For statistical analysis, see STAR methods. \* $<0.05$ ; ns, non-  
1255 significant.

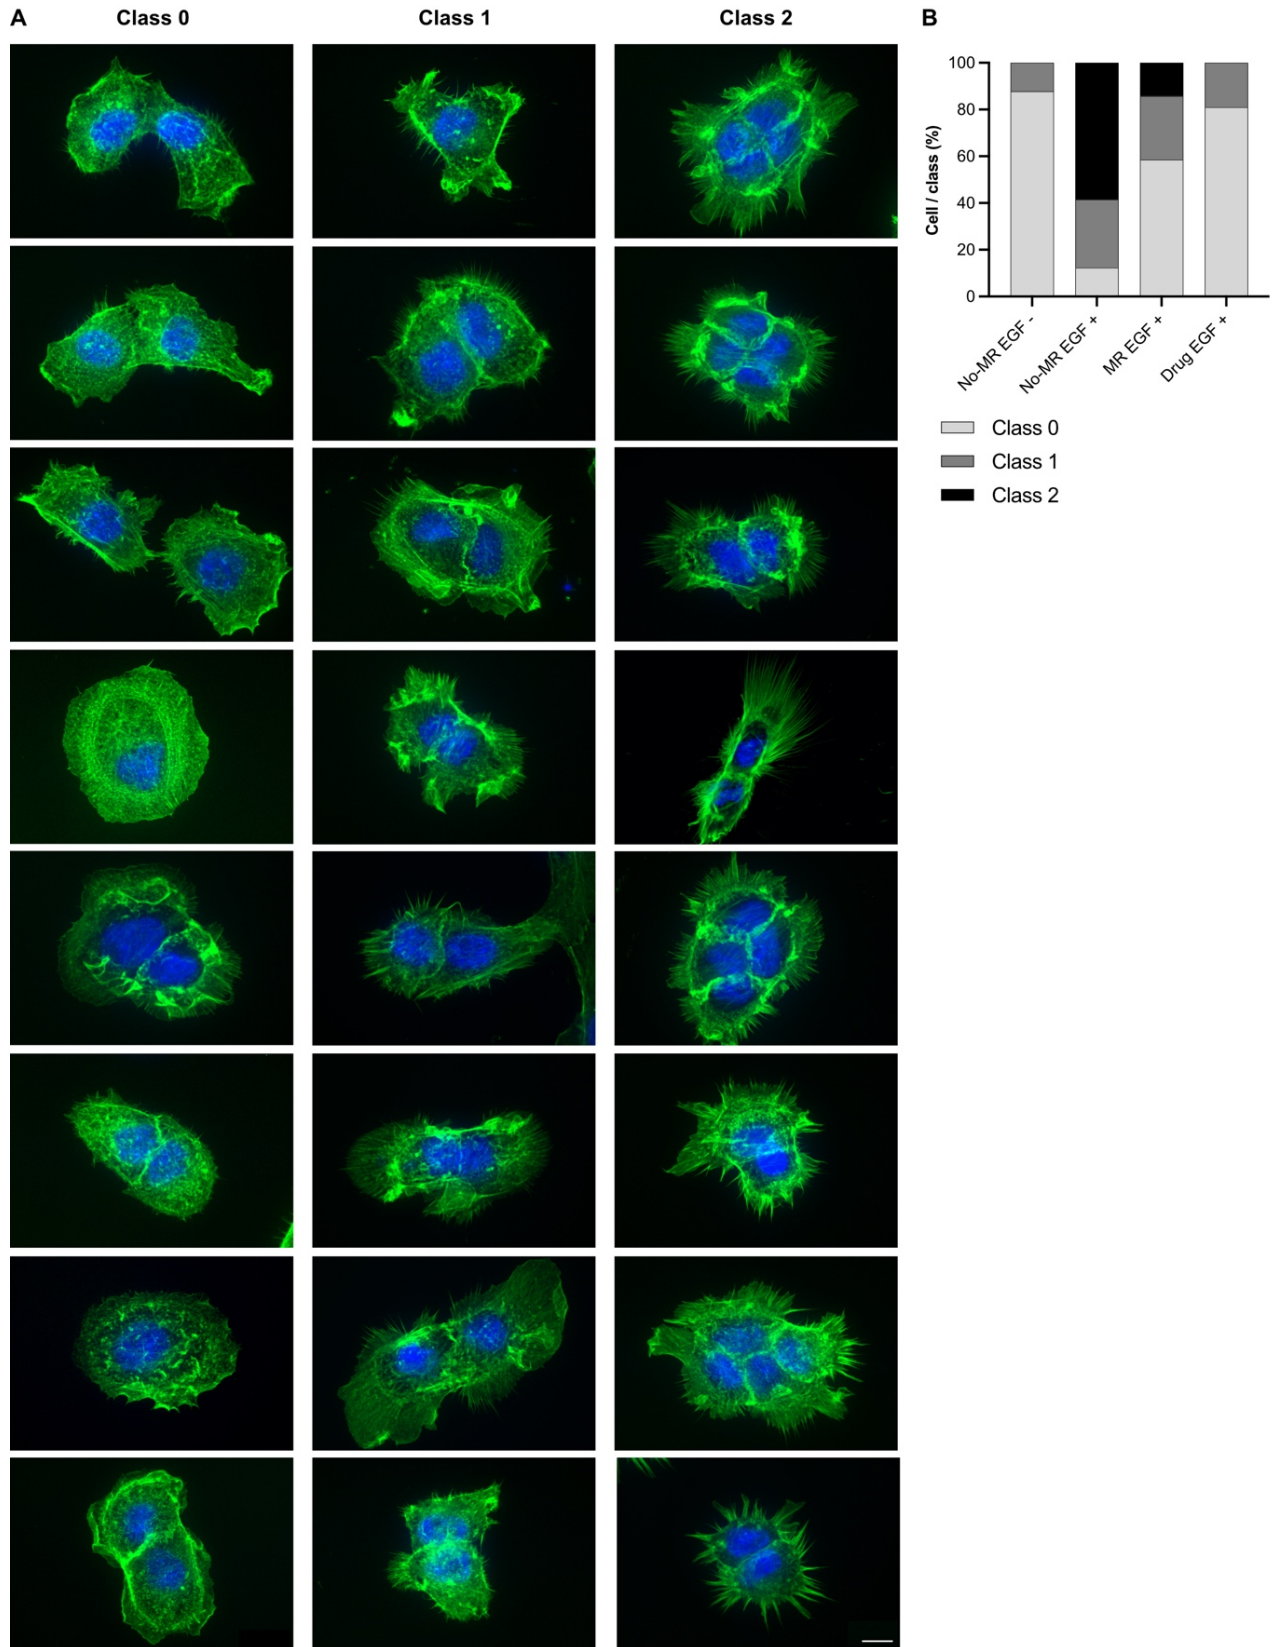

1256

1257

Laranjeira et al. 2023

1258 **Figure S8. Methionine dependency of RAS/MAPK-induced phenotypes in mammalian cells.**

1259 (A) Examples of A431 cells stained with DAPI (blue) and phalloidin (green) after EGF stimulation; cells were  
1260 serum starved for 16 hours and stimulated for 10 min with 100 ng/ml human EGF before fixation; cells were  
1261 categorized into three qualitative groups: 0 for cells without filopodia, 1 for cells with short filopodia not covering  
1262 the whole cell surface and 2 for cells with long filopodia covering most of the cell surface; the panel shows  
1263 examples for each class; scale bar: 10  $\mu$ m. (B) Percentage of cells in each class with and without MR, with and  
1264 without EGF-stimulation or MEK inhibitors as indicated on the x-axis.

1265 **Key resources table**

| REAGENT or RESOURCE                                                       | SOURCE                   | IDENTIFIER   |
|---------------------------------------------------------------------------|--------------------------|--------------|
| <b>Antibodies</b>                                                         |                          |              |
| Anti-dephosphorylated ERK 1&2 Mouse                                       | Sigma-Aldrich            | M8159        |
| Anti-MAP Kinase Rabbit                                                    | Sigma-Aldrich            | T6074        |
| Anti-XND-1 Guinea-Pig                                                     | Judith Yanowitz          | -            |
| Anti-SUN-1 (pS8) Guinea-Pig                                               | Verena Jantsch           | -            |
| Anti-GLD-1 Rabbit                                                         | Judith Kimble            | -            |
| Anti-HIM-3 Rabbit                                                         | Monique Zetka            | -            |
| Anti-phospho-histone H3 (Ser10)                                           | Merck                    | 05-806       |
| Anti-Rabbit Alexa 568 Donkey                                              | Invitrogen               | A-10042      |
| Anti-Guinea Pig Alexa 594 Goat                                            | Invitrogen               | A-11076      |
| Anti-mouse Alexa 488 Goat                                                 | Molecular Probes         | A-11001      |
| Anti-histone H3 Rabbit                                                    | Abcam                    | ab1791       |
| Anti-histone H3 tri methyl K4                                             | Abcam                    | ab8580       |
| HRP conjugated anti-Rabbit                                                | Jackson Immuno Research  | 111-035-144  |
| HRP conjugated anti-Mouse                                                 | Jackson Immuno Research  | 115-035-146  |
| Anti-alpha Tubulin                                                        | Abcam                    | ab18251      |
| Phalloidin 568                                                            | Thermo Fisher Scientific | B3475        |
| <b>Chemicals</b>                                                          |                          |              |
| Vitamin B12                                                               | Sigma-Aldrich            | V2876-1G     |
| Choline                                                                   | Sigma-Aldrich            | 401757       |
| L-Methionine                                                              | Sigma-Aldrich            | 1.05707      |
| Folinic acid calcium salt hydrate                                         | Sigma-Aldrich            | F7878-100MG  |
| Uridine                                                                   | Sigma-Aldrich            | U3003-50G    |
| Thymidine                                                                 | Sigma-Aldrich            | T9250-25G    |
| Guanosine                                                                 | Sigma-Aldrich            | G6264-25G    |
| Cytidine                                                                  | Sigma-Aldrich            | C4654-5G     |
| Tergitol (NP40S)                                                          | Merck                    | MFCD01779855 |
| Sodium oleate                                                             | Merck                    | O3880        |
| Palmitoleic acid                                                          | Merck                    | P9417-100    |
| OptiPrep Density Gradient medium                                          | Sigma-Aldrich            | D1556        |
| Pluronic F127                                                             | Sigma-Aldrich            | D1556        |
| DMEM, with high glucose and sodium pyruvate                               | Thermo Fisher Scientific | 41966029     |
| DMEM medium with high glucose, no glutamine, no methionine and no cystine | Thermo Fisher Scientific | 21013024     |
| FCS                                                                       | Gibco                    | 10500-064    |
| L-Glutamine                                                               | Thermo Fisher Scientific | A29168-01    |
| L-Methionine                                                              | Thermo Fisher Scientific | J61904.18    |
| L-Cystine dihydrochloride                                                 | Thermo Fisher Scientific | J62292.14    |
| DL-Homocysteine thiolactone hydrochloride                                 | Thermo Fisher Scientific | L09077.14    |
| Sodium pyruvate                                                           | Thermo Fisher Scientific | 11360070     |
| MEK162 (binimetinib)                                                      | Selleckchem              | 606143-89-9  |



Laranjeira et al. 2023

|                                                                                                                                                |                           |              |
|------------------------------------------------------------------------------------------------------------------------------------------------|---------------------------|--------------|
| LGX818 (ecorafenib)                                                                                                                            | MedChemExpress            | 1269440-17-6 |
| Mowiol (pH 8.3)                                                                                                                                | DABCO                     | 20211125     |
| NuPAGE 4-12% Bis-Tris Gel                                                                                                                      | Thermo Fisher Scientific  | NP0321       |
| Bovine Serum Albumin (BSA)                                                                                                                     | Merck                     | 10735086001  |
| SuperSignal West Dura Extended Duration Substrate                                                                                              | Thermo Fisher Scientific  | 34075        |
| SuperSignal West Pico PLUS Chemiluminescent Substrate                                                                                          | Thermo Fisher Scientific  | 34577        |
| Experimental model: Cell Lines                                                                                                                 |                           |              |
| A549                                                                                                                                           | Greber lab                | -            |
| A431                                                                                                                                           | Sigma-Aldrich             | 85090402     |
| MEF: KRAS 4B WT                                                                                                                                | National Cancer Institute | RPZ26216     |
| MEF: KRAS 4B G12C                                                                                                                              | National Cancer Institute | RPZ26186     |
| MEF: KRAS 4B G12V                                                                                                                              | National Cancer Institute | RPZ26425     |
| MEF: BRAF V600E                                                                                                                                | National Cancer Institute | RPZ26275     |
| Experimental model: Bacterial strains                                                                                                          |                           |              |
| <i>E. coli</i> OP50                                                                                                                            | CGC                       | -            |
| <i>C. aquosa</i> DA1877                                                                                                                        | CGC                       | -            |
| <i>E. coli</i> HT115                                                                                                                           | CGC                       | -            |
| <i>E. coli</i> cytR <sup>-</sup>                                                                                                               | CGC                       | -            |
| <i>C. aquosa</i> DA1877 ciA <sup>-</sup> /conB <sup>-</sup>                                                                                    | Walhout lab               | -            |
| <i>C. aquosa</i> DA1877 cbiB <sup>-</sup>                                                                                                      | Walhout lab               | -            |
| Experimental model: <i>C. elegans</i> strains                                                                                                  |                           |              |
| Wild-type                                                                                                                                      | CGC                       | N2           |
| <i>bcls39</i> [ <i>Plim-7::ced-1::gfp</i> ] <i>V</i>                                                                                           | Derry et al., 2001        | WS4116       |
| <i>let-60(n1046) IV</i>                                                                                                                        | Beitel et al., 1990       | MT2124       |
| <i>let-60(ga89) IV</i>                                                                                                                         | Eisenmann and Kim, 1997   | SD551        |
| <i>let-60(ga89) IV</i> ; <i>bcls39</i> [ <i>Plim-7::ced-1::gfp</i> ] <i>V</i>                                                                  | Kohlbrener et al., 2023   | AH5681       |
| <i>R03D7.1(ok521) II</i>                                                                                                                       | CGC                       | RB755        |
| <i>mmcm-1(ok1637) III</i> ; <i>bcls39</i> [ <i>Plim-7::ced-1::gfp</i> ] <i>V</i>                                                               | This study                | AH5884       |
| <i>R03D7.1(ok521) II</i> ; <i>bcls39</i> [ <i>Plim-7::ced-1::gfp</i> ] <i>V</i>                                                                | This study                | AH5885       |
| <i>mmcm-1(ok1637) III</i> ; <i>let-60(n1046) IV</i>                                                                                            | This study                | AH6148       |
| <i>R03D7.1(ok521) II</i> ; <i>let-60(n1046) IV</i>                                                                                             | This study                | AH6147       |
| <i>mmcm-1(ok1637) III</i> ; <i>bcls39</i> [ <i>Plim-7::ced-1::gfp</i> ] <i>V</i> ; <i>zhEx671(mmcm-1 pcr)</i>                                  | This study                | AH5971       |
| <i>R03D7.1(ok521) II</i> ; <i>bcls39</i> [ <i>Plim-7::ced-1::gfp</i> ] <i>V</i> ; <i>zhEx672(metr-1 pcr)</i>                                   | This study                | AH5974       |
| <i>R03D7.1(ok521) II zhEx672(metr-1 pcr)</i> ; <i>let-60(ga89) IV</i> ; <i>bcls39</i> [ <i>Plim-7::CED-1::GFP</i> ] <i>V</i>                   | This study                | AH6111       |
| <i>R03D7.1(ok521) II</i> ; <i>zhEx672(metr-1 pcr)</i> ; <i>let-60(n1046) IV</i>                                                                | This study                | AH6289       |
| <i>itIs37</i> [ <i>Ppie-1::mCherry::H2B::pie-1 3'UTR + unc-119(+)</i> ]; <i>xnIs87</i> [ <i>syn-4p::GFP::syn-4::syn-4 3'UTR + unc-119(+)</i> ] | Kohlbrener et al., 2023   | AH3062       |
| <i>R03D7.1(ok521) II</i> ; <i>xnIs87</i> [ <i>syn-4p::GFP::syn-4::syn-4 3'UTR + unc-119(+)</i> ]                                               | This study                | AH6206       |

|                                                                                                                           |                          |         |
|---------------------------------------------------------------------------------------------------------------------------|--------------------------|---------|
| <i>let-60(ga89) IV; xnIs87[syn-4p::GFP::syn-4::syn-4 3'UTR + unc-119(+)]</i>                                              | Kohlbrener et al., 2023  | AH5173  |
| <i>unc-119(ed3) ruls32[histoneH2b::gfp] III</i>                                                                           | Rosu et al., 2013        | AZ212   |
| <i>R03D7.1(ok521) II; unc-119(ed3) ruls32[histoneH2b::gfp] III</i>                                                        | This study               | AH6149  |
| <i>unc-119(ed3) ruls32[histoneH2b::gfp] III; let-60(ga89) IV</i>                                                          | This study               | AH5161  |
| <i>mpk-1(ga111) unc-79(e1068) III; zhEx676 (mpk-1 PCR); bcls39[Plim-7::ced-1::gfp] V</i>                                  | Kohlbrener et al., 2023  | AH6089  |
| <i>arTi85[Plin-31::ERK-KTR(NLS3)-mClover-T2A-mCherry-H2B::unc-543`UTR, Prps-27::NeoR::unc-543`UTR]</i>                    | de la Cova et al., 2017  | GS8190  |
| <i>arTi101[Plin-31::ERK-KTR(NLS3, S43A, T55A, S62A)-mClover-T2A-mCherry-H2B::unc-543`UTR, Prps-27::NeoR::unc-543`UTR]</i> | de la Cova et al., 2017  | GS8255  |
| <i>idrls1ldrIs1 [pdhs-3::dhs-3::gfp + unc-76(+)]</i>                                                                      | Zhang et al., 2012       | LIU1    |
| <i>lin-1(st12212[lin-1::TY1::EGFP::3xFLAG]) IV</i>                                                                        | CGC                      | RW12212 |
| <i>lin-1(st12212[lin-1::TY1::EGFP::3xFLAG]) IV; let-60(n1046) IV</i>                                                      | This study               | AH6315  |
| <i>lin-39::ZF1::gfp(zh120) III</i>                                                                                        | Heinze et al., 2023      | AH4744  |
| <i>lin-39::ZF1::gfp(zh120) III; let-60(n1046) IV</i>                                                                      | This study               | AH6314  |
| <i>ced-3 (n717)</i>                                                                                                       | Shaham and Horvitz, 1996 | MT1522  |
| <i>ced-3(n717) IV; ced-1::gfp V</i>                                                                                       | Kohlbrener et al., 2023  | AH5646  |
| <i>cep-1(gk138) I; bcls39[Plim-7::ced-1::gfp] V</i>                                                                       | Kohlbrener et al., 2023  | AH5891  |
| <i>pch-2(tm1458) II; bcls39[Plim-7::ced-1::gfp] V</i>                                                                     | Kohlbrener et al., 2023  | AH6254  |
| <i>let-60(n1046) IV; saIs14[lin-48::gfp]</i>                                                                              | Schmid et al., 2015      | AH552   |
| <i>let-60(n2021) IV</i>                                                                                                   | Beitel et al., 1990      | MT4866  |
| <b>Oligonucleotides</b>                                                                                                   |                          |         |
| ACGCTTTCTGGTCAAACCTGG                                                                                                     | This study               | OAL12   |
| CGGTGAGATCTTCGTTGGTT                                                                                                      | This study               | OAL13   |
| TTGGGAAGACCTGGAAATGG                                                                                                      | This study               | OAL30   |
| CGGTCTTCCCAATTTCTTGA                                                                                                      | This study               | OAL09   |
| TTCCCAAATTTTCGTTGCTC                                                                                                      | This study               | OAL10   |
| CGACAAAGTGATTCTGGATGACAACCTTTGGTGAG                                                                                       | This study               | OAL109  |
| CGACAAAGTGATTCTGGATGACAACCTTTGGTGAA                                                                                       | This study               | OAL110  |
| TCATTCTCCGTCGTCTTC                                                                                                        | Kohlbrener et al., 2023  | OTS38   |
| GTTACTCATTCCGACTCACC                                                                                                      | This study               | OAL50   |
| GGATGAGTTGAATGGTGAGTGCTCTAAATCCAACCTC                                                                                     | This study               | OAL95   |
| GGATGAGTTGAATGGTGAGTGCTCTAAATCCAACCTT                                                                                     | This study               | OAL96   |
| TTCAAATCACGATGGAGCA                                                                                                       | Kohlbrener et al., 2023  | OTS25   |
| TACATTCACCTCTGCAAATGG                                                                                                     | Kohlbrener et al., 2023  | OTS26   |
| GCTGCTTGTTTAGATTTACG                                                                                                      | Kohlbrener et al., 2023  | OTS27   |
| CGTAGTTCAATTCAGGGGTG                                                                                                      | Kohlbrener et al., 2023  | OTS28   |
| GTCCCAGTCACCGTCCGATCAC                                                                                                    | Fergin et al., 2022      | OAF351  |
| GTCATCTGGAGTCCCAATAGCTC                                                                                                   | Fergin et al., 2022      | OAF352  |
| GCCAGCATTACTCTGTTTGTGTGG                                                                                                  | Heinze et al., 2023      | OSH53   |
| GTGCGTGAGGAAAACAAGTTAG                                                                                                    | Heinze et al., 2023      | OSH72   |
| CACGTCGACTTCAATTGTGT                                                                                                      | This study               | OAL40   |

Laranjeira et al. 2023

|                         |                         |           |
|-------------------------|-------------------------|-----------|
| TGCCAGGACCAAACGCATTG    | This study              | OAL41     |
| GCCCACCCCAACTCATTAGTAT  | This study              | OAL38     |
| GTAGTTTCTAGATTAGGGCG    | This study              | OAL39     |
| Software and algorithms |                         |           |
| Matlab                  | MathWorks               | R2020b    |
| Fiji                    | Schindelin et al., 2012 | -         |
| Prims 10                | GraphPad                | 10.0(131) |

1266
